# Supplementary material for: Alu insertion polymorphisms shared by Papio baboons and Theropithecus gelada reveal an intertwined common ancestry
Source: Mob DNA. 2019 Nov 26;10:46. doi: 10.1186/s13100-019-0187-y (PMC6880559; doi:10.1186/s13100-019-0187-y)
Supplement: Supplementary file 1 — Additional file 1. An Excel file containing different worksheets for the WGS sample list, Tables S1 – S4, Figure S1 and “Papio-Theropithecus”. (XLSX 173kb) [file 13100_2019_187_MOESM1_ESM.xlsx]

## Sheet: WGS data
	WGS data samples obtained from ncbi sra database
	WGS samples
	Species	Isolate	ID	Source	Sex	Platform	Runs	Bytes	Bases	ncbi sra link
	Macaca mulatta	17573	17573	Blood	Female	Illumina	22	56.21	102.29	https://www.ncbi.nlm.nih.gov/Traces/study/?acc=SAMN00766305
	Papio anubis	LIV5	LIV5	Blood	Female	Illumina	6	52.55	92.89	https://www.ncbi.nlm.nih.gov/Traces/study/?acc=SAMN02866411
	Papio anubis	L142	L142	Blood	Male	Illumina	6	41.98	77.35	https://www.ncbi.nlm.nih.gov/Traces/study/?acc=SAMN02866410
	Papio cynocephalus	16066	3130	Blood	Female	Illumina	7	56.25	92.69	https://www.ncbi.nlm.nih.gov/Traces/study/?acc=SAMN02866414
	Papio cynocephalus	16098	5026	Blood	Female	Illumina	6	41.7	76.68	https://www.ncbi.nlm.nih.gov/Traces/study/?acc=SAMN02866415
	Papio hamadryas	97074	97074	Blood	Not determined	Illumina	5	48.29	80.3	https://www.ncbi.nlm.nih.gov/Traces/study/?acc=SAMN03073709
	Papio hamadryas	97124	97124	Blood	Not determined	Illumina	4	49.33	77.16	https://www.ncbi.nlm.nih.gov/Traces/study/?acc=SAMN03073710
	Papio kindae	34449	BZ11022	Blood	Female	Illumina	5	84.53	131.23	https://www.ncbi.nlm.nih.gov/Traces/study/?acc=SAMN03072807
	Papio kindae	34474	BZ11050	Blood	Female	Illumina	4	76.87	117.47	https://www.ncbi.nlm.nih.gov/Traces/study/?acc=SAMN03072185
	Papio papio	28547	28547	Blood	Not determined	Illumina	5	61.5	100.44	https://www.ncbi.nlm.nih.gov/Traces/study/?acc=SAMN03073711
	Papio papio	30388	30388	Blood	Male	Illumina	5	60.74	98.85	https://www.ncbi.nlm.nih.gov/Traces/study/?acc=SAMN02866416
	Papio ursinus	28697	28697	Blood	Female	Illumina	5	44.67	79.01	https://www.ncbi.nlm.nih.gov/Traces/study/?acc=SAMN02866413
	Papio ursinus	28755	28755	Blood	Female	Illumina	8	48.58	83.38	https://www.ncbi.nlm.nih.gov/Traces/study/?acc=SAMN02866412
	Theropithecus gelada	891096	38168	Blood	Female	Illumina	3	72.59	183.32	https://www.ncbi.nlm.nih.gov/Traces/study/?acc=SAMN06167567

## Sheet: Table S1
		Table S1. P(T<=t) two-tail: P values following one-way ANOVA and Bonferroni post-hoc t-tests for shared in 2-10 of 12.
		Species comparison	2 of 12	3 of 12	4 of 12	5 of 12	6 of 12	7 of 12	8 of 12	9 of 12	10 of 12
		P. anubis / P. hamadryas	0.0140312	0.00950773	0.786389	0.224612	0.135841	0.198613	0.58196	0.173423	0.0111234
		P. anubis / P. papio	0.0769231	0.743883	0.38437	0.453901	0.42265	0.0959013	0.295804	0.337905	0.0496485
		P. anubis / P. cynocephalus	0.181874	0.00308585	0.558445	0.0571643	0.000935794	0.681019	0.650926	0.265718	0.0743549
		P. anubis / P. ursinus	0.551735	0.292059	0.709974	0.309908	0.283023	0.766048	0.977383	0.508883	0.25016
		P. anubis / P. kindae	0.0320263	0.028226	0.0228782	0.00583398	0.0116476	0.0188999	0.0238856	0.0119912	0.0368165
		P. hamadryas / P. Papio	0.0323228	0.0736002	0.353898	0.920305	0.532445	0.158765	0.258805	0.988538	0.330571
		P. hamadryas / P cynocephalus	0.0298575	0.0214628	0.0943456	0.0543733	0.007728	0.0603108	0.835423	0.918836	0.876793
		P. hamadryas / P. ursinus	0.149316	0.795153	0.591064	0.212345	0.200224	0.743944	0.887932	0.856582	0.783811
		P. hamadryas / P. kindae	0.0512769	0.0356545	0.0143425	0.00771014	0.0109302	0.0108958	0.0251894	0.00298843	0.00261196
		P. papio / P. cynocephalus	0.456964	0.0279339	0.174346	0.100288	0.0141412	0.0597199	0.270271	0.938928	0.38674
		P. papio / P ursinus	0.756793	0.333753	0.372445	0.246067	0.241593	0.329851	0.490412	0.871146	0.869811
		P. papio / P. kindae	0.0372791	0.0295611	0.0187407	0.013164	0.012393	0.0119168	0.0289424	0.0210379	0.0234999
		P. cynocephalus / P. ursinus	0.98459	0.744159	0.920204	0.960804	0.774859	0.632976	0.827987	0.835874	0.757407
		P. cynocephalus / P. kindae	0.0356863	0.0415162	0.0180341	0.017138	0.0254898	0.0168628	0.0314961	0.00956873	0.0273945
		P. ursinus / P. kindae	0.0400634	0.0506014	0.0538898	0.0734129	0.0758827	0.0424086	0.0519537	0.0890096	0.136039
		North / South Clades	0.2281	0.0555	0.0584	0.0071647	0.0048516	0.0644904	0.102588	0.341334	0.596167

## Sheet: Tables S2 and S3
	Table S2. Number of Alu insertion polymorphisms ascertained from T. gelada that are shared in a Papio individual when shared in any 2-11 of the 12 individuals, following a filtering step on the dataset reads to require a minimum of 30bp of 5' flanking sequence ahead of the head of the Alu dectection for the read to be retained.																			Table S3. P(T<=t) two-tail: P values following one-way ANOVA and Bonferroni post-hoc t-tests for shared in 2-7 of 12 from the data shown in Table S2.
			Northern clade						Southern clade											Species comparison	2 of 12	3 of 12	4 of 12	5 of 12	6 of 12	7 of 12
			P. anubis		P. hamadryas		P. papio		P. cynocephalus		P. ursinus		P. kindae		North	South				P. anubis / P. hamadryas	0.013369	0.140417	0.936978	0.805637	0.447545	0.575113
	A.	B.	LIV5	L142	97124	97074	28547	30388	16066	16098	28697	28755	34449	34474	clade	clade				P. anubis / P. papio	0.0395351	0.615544	0.788438	0.772238	0.817045	0.770297
	2	750	56	35	136	135	103	96	82	89	101	85	305	277	561	939				P. anubis / P. cynocephalus	0.0687596	0.0535462	0.161197	0.263919	0.0999863	0.468293
	3	580	100	70	123	119	84	109	146	149	159	112	305	264	605	1135				P. anubis / P. ursinus	0.0692981	0.211779	0.365296	0.350532	0.164373	0.482622
	4	630	190	123	162	157	128	162	230	229	259	177	373	330	922	1598				P. anubis / P. kindae	0.00504288	0.0158283	0.039234	0.0779316	0.0347927	0.121755
	5	605	240	116	188	203	180	219	270	277	299	229	426	378	1146	1879				P. hamadryas / P. Papio	0.00950773	0.192588	0.487588	0.865844	0.108247	0.276504
	6	697	294	193	283	300	248	266	392	390	428	343	540	505	1584	2598				P. hamadryas / P cynocephalus	0.00496281	0.00878289	0.0013239	0.0110724	0.00731769	0.0662009
	7	717	426	256	402	393	352	388	414	419	443	391	587	548	2217	2802				P. hamadryas / P. ursinus	0.0337789	0.601316	0.290414	0.195772	0.162349	0.536862
	8	899	601	366	601	609	525	558	575	626	644	536	779	772	3260	3932				P. hamadryas / P. kindae	0.00801864	0.0155023	0.0124716	0.014505	0.00701861	0.0135766
	9	1180	953	532	883	878	870	904	849	917	916	804	1065	1049	5020	5600				P. papio / P. cynocephalus	0.105573	0.0558793	0.0382034	0.0647884	0.00453567	0.124781
	10	2014	1799	1135	1658	1686	1645	1741	1653	1737	1749	1546	1906	1885	9664	10476				P. papio / P ursinus	0.534227	0.280487	0.24176	0.248716	0.0978123	0.27555
	11	4381	4208	2247	4147	4167	4217	4303	4067	4123	4226	3918	4277	4291	23289	24902				P. papio / P. kindae	0.00563076	0.0159226	0.0171652	0.0225344	0.00544881	0.0175801
	Total	12453																		P. cynocephalus / P. ursinus	0.480904	0.660995	0.805469	0.812414	0.908898	0.986465
																				P. cynocephalus / P. kindae	0.00489512	0.0217779	0.0296964	0.0338278	0.0173081	0.0165318
																				P. ursinus / P. kindae	0.00656672	0.0411213	0.10216	0.0829704	0.0965309	0.0436055
																				North / South Clades	0.200284	0.0213094	0.00478155	0.005692	0.00065283	0.0392528

## Sheet: Papio-Theropithecus
										Anubis
		Predicted Papio	Predicted insertion	P. anubis	P. anubis	Theropithecus	orientation	Present in		Locus		Predicted Papio	Predicted insertion	P. anubis	P. anubis	Theropithecus	orientation	Present in
		Species-specific	coordinate [Mmul8.0.1]	Olive	Olive	gelada	0 is forward	Panu_2.0		#		Species-specific	coordinate [Mmul8.0.1]	Olive	Olive	gelada	0 is forward	Panu_2.0
	1	P. anubis	Chr1:8806687	LIV5	L142	38168	1	yes		2	1	P. anubis	Chr1:135538510	LIV5	L142	38168	1	yes
	2	P. anubis	Chr1:135538510	LIV5	L142	38168	1	yes		10	2	P. anubis	Chr4:3838809	LIV5	L142	38168	1	has NPI
	3	P. anubis	Chr2:10688675	LIV5	L142	38168	0			11	3	P. anubis	Chr4:42813973	LIV5	L142	38168	1
	4	P. anubis	Chr2:121829225	LIV5	L142	38168	1	yes		23	4	P. anubis	Chr10:368096	LIV5	L142	38168	0	yes
	5	P. anubis	Chr2:160053552	LIV5	L142	38168	1	yes		24	5	P. anubis	Chr11:123413715	LIV5	L142	38168	1	yes
	6	P. anubis	Chr3:106817315	LIV5	L142	38168	0			26	6	P. anubis	Chr14:18332652	LIV5	L142	38168	0	yes
	7	P. anubis	Chr3:137940463	LIV5	L142	38168	1	yes		27	7	P. anubis	Chr14:101826506	LIV5	L142	38168	1	yes
	8	P. anubis	Chr3:159704165	LIV5	L142	38168	1			28	8	P. anubis	Chr14:121976117	LIV5	L142	38168	0
	9	P. anubis	Chr3:171109332	LIV5	L142	38168	1			29	9	P. anubis	Chr15:46734600	LIV5	L142	38168	0
	10	P. anubis	Chr4:3838809	LIV5	L142	38168	1	has NPI		30	10	P. anubis	Chr16:68749659	LIV5	L142	38168	1
	11	P. anubis	Chr4:42813973	LIV5	L142	38168	1			32	11	P. anubis	Chr17:81956676	LIV5	L142	38168	0
	12	P. anubis	Chr4:66041050	LIV5	L142	38168	0			33	12	P. anubis	Chr18:65893797	LIV5	L142	38168	0
	13	P. anubis	Chr4:151637889	LIV5	L142	38168	1
	14	P. anubis	Chr5:71386156	LIV5	L142	38168	1	yes
	15	P. anubis	Chr5:72946739	LIV5	L142	38168	1
	16	P. anubis	Chr5:129796706	LIV5	L142	38168	1
	17	P. anubis	Chr5:158053428	LIV5	L142	38168	1
	18	P. anubis	Chr5:158939114	LIV5	L142	38168	1
	19	P. anubis	Chr5:163794154	LIV5	L142	38168	1
	20	P. anubis	Chr6:121829604	LIV5	L142	38168	1
	21	P. anubis	Chr7:69352093	LIV5	L142	38168	1
	22	P. anubis	Chr8:67507593	LIV5	L142	38168	1
	23	P. anubis	Chr10:368096	LIV5	L142	38168	0	yes
	24	P. anubis	Chr11:123413715	LIV5	L142	38168	1	yes
	25	P. anubis	Chr12:2499389	LIV5	L142	38168	1
	26	P. anubis	Chr14:18332652	LIV5	L142	38168	0	yes
	27	P. anubis	Chr14:101826506	LIV5	L142	38168	1	yes
	28	P. anubis	Chr14:121976117	LIV5	L142	38168	0
	29	P. anubis	Chr15:46734600	LIV5	L142	38168	0
	30	P. anubis	Chr16:48075778	LIV5	L142	38168	0	yes
	31	P. anubis	Chr16:68749659	LIV5	L142	38168	1
	32	P. anubis	Chr17:81956676	LIV5	L142	38168	0
	33	P. anubis	Chr18:65893797	LIV5	L142	38168	0						not in previous dataset
	34	P. anubis	Chr20:26143631	LIV5	L142	38168	1	yes		Ham
		Predicted Papio	Predicted insertion	P. hamadryas		Theropithecus	orientation	Present in		Locus		Predicted Papio	Predicted insertion	P. hamadryas		Theropithecus	orientation	Present in
		Species-specific	coordinate [Mmul8.0.1]	Hamadryas		gelada	0 is forward	Panu_2.0		#		Species-specific	coordinate [Mmul8.0.1]	Hamadryas		gelada	0 is forward	Panu_2.0
	1	P. hamadryas	Chr1:17298665	97124	97074	38168	1			1	1	P. hamadryas	Chr1:17298665	97124	97074	38168	1
	2	P. hamadryas	Chr1:39348139	97124	97074	38168	1			n/a	2	P. hamadryas	Chr1:54142966	97124	97074	38168	0
	3	P. hamadryas	Chr1:62724928	97124	97074	38168	0			3	3	P. hamadryas	Chr1:62724928	97124	97074	38168	0
	4	P. hamadryas	Chr1:67290257	97124	97074	38168	0			5	4	P. hamadryas	Chr1:84690647	97124	97074	38168	1
	5	P. hamadryas	Chr1:84690647	97124	97074	38168	1			6	5	P. hamadryas	Chr1:89346965	97124	97074	38168	0
	6	P. hamadryas	Chr1:89346965	97124	97074	38168	0			7	6	P. hamadryas	Chr1:89787971	97124	97074	38168	1
	7	P. hamadryas	Chr1:89787971	97124	97074	38168	1			n/a	7	P. hamadryas	Chr1:110072588	97124	97074	38168	0
	8	P. hamadryas	Chr1:113895940	97124	97074	38168	0				8	P. hamadryas	Chr1:113895940	97124	97074	38168	0
	9	P. hamadryas	Chr1:117621239	97124	97074	38168	1				9	P. hamadryas	Chr1:117621239	97124	97074	38168	1
	10	P. hamadryas	Chr1:131805638	97124	97074	38168	1				10	P. hamadryas	Chr1:131805638	97124	97074	38168	1
	11	P. hamadryas	Chr1:161372329	97124	97074	38168	1				11	P. hamadryas	Chr1:193793174	97124	97074	38168	0
	12	P. hamadryas	Chr1:193793174	97124	97074	38168	0				12	P. hamadryas	Chr1:202476748	97124	97074	38168	0
	13	P. hamadryas	Chr1:202476748	97124	97074	38168	0				13	P. hamadryas	Chr2:116678503	97124	97074	38168	1
	14	P. hamadryas	Chr2:53566376	97124	97074	38168	0				14	P. hamadryas	Chr2:123043655	97124	97074	38168	0
	15	P. hamadryas	Chr2:116678503	97124	97074	38168	1				15	P. hamadryas	Chr2:123935865	97124	97074	38168	1
	16	P. hamadryas	Chr2:121815818	97124	97074	38168	1				16	P. hamadryas	Chr2:182711720	97124	97074	38168	1
	17	P. hamadryas	Chr2:123043655	97124	97074	38168	0				17	P. hamadryas	Chr2:192739273	97124	97074	38168	0
	18	P. hamadryas	Chr2:123935865	97124	97074	38168	1				18	P. hamadryas	Chr3:52301047	97124	97074	38168	0
	19	P. hamadryas	Chr2:168358090	97124	97074	38168	1				19	P. hamadryas	Chr3:56152417	97124	97074	38168	0
	20	P. hamadryas	Chr2:182711720	97124	97074	38168	1			25	20	P. hamadryas	Chr3:70531752	97124	97074	38168	1
	21	P. hamadryas	Chr2:192739273	97124	97074	38168	0				21	P. hamadryas	Chr3:168766188	97124	97074	38168	1
	22	P. hamadryas	Chr3:35755590	97124	97074	38168	1				22	P. hamadryas	Chr3:174579462	97124	97074	38168	0
	23	P. hamadryas	Chr3:52301047	97124	97074	38168	0				23	P. hamadryas	Chr4:10206485	97124	97074	38168	0
	24	P. hamadryas	Chr3:56152417	97124	97074	38168	0				24	P. hamadryas	Chr4:10788188	97124	97074	38168	0
	25	P. hamadryas	Chr3:70531752	97124	97074	38168	1				25	P. hamadryas	Chr4:168397332	97124	97074	38168	1
	26	P. hamadryas	Chr3:168766188	97124	97074	38168	1				26	P. hamadryas	Chr5:250981	97124	97074	38168	0
	27	P. hamadryas	Chr4:8757646	97124	97074	38168	1				27	P. hamadryas	Chr5:9187997	97124	97074	38168	1
	28	P. hamadryas	Chr4:10206485	97124	97074	38168	0				28	P. hamadryas	Chr5:9485641	97124	97074	38168	1	yes
	29	P. hamadryas	Chr4:10788188	97124	97074	38168	0				29	P. hamadryas	Chr5:58080971	97124	97074	38168	1	yes
	30	P. hamadryas	Chr4:168397332	97124	97074	38168	1				30	P. hamadryas	Chr5:59752670	97124	97074	38168	1
	31	P. hamadryas	Chr5:250981	97124	97074	38168	0				31	P. hamadryas	Chr5:78955176	97124	97074	38168	1
	32	P. hamadryas	Chr5:9187997	97124	97074	38168	1				32	P. hamadryas	Chr5:133732450	97124	97074	38168	0	yes
	33	P. hamadryas	Chr5:9485641	97124	97074	38168	1	yes			33	P. hamadryas	Chr6:9325614	97124	97074	38168	1
	34	P. hamadryas	Chr5:59752670	97124	97074	38168	1				34	P. hamadryas	Chr6:10095480	97124	97074	38168	0
	35	P. hamadryas	Chr5:78955176	97124	97074	38168	1				35	P. hamadryas	Chr6:34784751	97124	97074	38168	1
	36	P. hamadryas	Chr5:133732450	97124	97074	38168	0	yes			36	P. hamadryas	Chr6:70295758	97124	97074	38168	1
	37	P. hamadryas	Chr6:10095480	97124	97074	38168	0				37	P. hamadryas	Chr6:77237261	97124	97074	38168	1
	38	P. hamadryas	Chr6:34784751	97124	97074	38168	1				38	P. hamadryas	Chr6:158505495	97124	97074	38168	1	has NPI
	39	P. hamadryas	Chr6:70295758	97124	97074	38168	1				39	P. hamadryas	Chr7:6457885	97124	97074	38168	1
	40	P. hamadryas	Chr6:77237261	97124	97074	38168	1				40	P. hamadryas	Chr7:8476704	97124	97074	38168	1
	41	P. hamadryas	Chr6:111510375	97124	97074	38168	1				41	P. hamadryas	Chr7:55589485	97124	97074	38168	1	has NPI
	42	P. hamadryas	Chr6:158505495	97124	97074	38168	1	has NPI			42	P. hamadryas	Chr7:66978361	97124	97074	38168	1
	43	P. hamadryas	Chr7:6457885	97124	97074	38168	1				43	P. hamadryas	Chr7:71722063	97124	97074	38168	0
	44	P. hamadryas	Chr7:8476704	97124	97074	38168	1				44	P. hamadryas	Chr7:107357864	97124	97074	38168	1
	45	P. hamadryas	Chr7:55589485	97124	97074	38168	0	has NPI			45	P. hamadryas	Chr7:135821000	97124	97074	38168	0
	46	P. hamadryas	Chr7:71722063	97124	97074	38168	0				46	P. hamadryas	Chr8:4054177	97124	97074	38168	0	yes
	47	P. hamadryas	Chr7:85424990	97124	97074	38168	0			52	47	P. hamadryas	Chr8:48509846	97124	97074	38168	0
	48	P. hamadryas	Chr7:107357864	97124	97074	38168	1				48	P. hamadryas	Chr8:143149799	97124	97074	38168	0
	49	P. hamadryas	Chr7:135787924	97124	97074	38168	0				49	P. hamadryas	Chr10:681494	97124	97074	38168	1
	50	P. hamadryas	Chr7:135821000	97124	97074	38168	0				50	P. hamadryas	Chr10:28791532	97124	97074	38168	1	has NPI
	51	P. hamadryas	Chr8:4054177	97124	97074	38168	0	yes			51	P. hamadryas	Chr10:31600832	97124	97074	38168	0	yes
	52	P. hamadryas	Chr8:48509846	97124	97074	38168	0				52	P. hamadryas	Chr10:66953894	97124	97074	38168	1	yes
	53	P. hamadryas	Chr8:143149799	97124	97074	38168	0				53	P. hamadryas	Chr10:66963704	97124	97074	38168	1
	54	P. hamadryas	Chr10:28791532	97124	97074	38168	1	has NPI			54	P. hamadryas	Chr11:2950767	97124	97074	38168	1
	55	P. hamadryas	Chr10:31600832	97124	97074	38168	0	yes			55	P. hamadryas	Chr11:6484596	97124	97074	38168	0	yes
	56	P. hamadryas	Chr10:66953894	97124	97074	38168	1	yes		59	56	P. hamadryas	Chr11:10553179	97124	97074	38168	0
	57	P. hamadryas	Chr10:66963704	97124	97074	38168	1				57	P. hamadryas	Chr11:12239089	97124	97074	38168	1
	58	P. hamadryas	Chr11:6484596	97124	97074	38168	0	yes			58	P. hamadryas	Chr11:20988634	97124	97074	38168	1	yes
	59	P. hamadryas	Chr11:10553179	97124	97074	38168	0				59	P. hamadryas	Chr11:22306568	97124	97074	38168	1
	60	P. hamadryas	Chr11:12239089	97124	97074	38168	1				60	P. hamadryas	Chr11:22310095	97124	97074	38168	0
	61	P. hamadryas	Chr11:22306568	97124	97074	38168	1				61	P. hamadryas	Chr11:31946816	97124	97074	38168	1
	62	P. hamadryas	Chr11:22310095	97124	97074	38168	0				62	P. hamadryas	Chr11:31993846	97124	97074	38168	0
	63	P. hamadryas	Chr11:31946816	97124	97074	38168	1				63	P. hamadryas	Chr11:49554773	97124	97074	38168	1
	64	P. hamadryas	Chr11:31993846	97124	97074	38168	0				64	P. hamadryas	Chr11:83027643	97124	97074	38168	1
	65	P. hamadryas	Chr11:34047374	97124	97074	38168	0				65	P. hamadryas	Chr11:95208530	97124	97074	38168	1
	66	P. hamadryas	Chr11:49554773	97124	97074	38168	1				66	P. hamadryas	Chr11:95215427	97124	97074	38168	0
	67	P. hamadryas	Chr11:58631174	97124	97074	38168	1				67	P. hamadryas	Chr11:124996167	97124	97074	38168	1
	68	P. hamadryas	Chr11:83027643	97124	97074	38168	1				68	P. hamadryas	Chr11:130877421	97124	97074	38168	1
	69	P. hamadryas	Chr11:95208530	97124	97074	38168	1			73	69	P. hamadryas	Chr12:65966678	97124	97074	38168	0
	70	P. hamadryas	Chr11:95215427	97124	97074	38168	0				70	P. hamadryas	Chr13:3378106	97124	97074	38168	0
	71	P. hamadryas	Chr11:124996167	97124	97074	38168	1			76	71	P. hamadryas	Chr13:75971083	97124	97074	38168	1
	72	P. hamadryas	Chr11:130877421	97124	97074	38168	1				72	P. hamadryas	Chr13:90492681	97124	97074	38168	0
	73	P. hamadryas	Chr12:65966678	97124	97074	38168	0				73	P. hamadryas	Chr13:106216330	97124	97074	38168	1
	74	P. hamadryas	Chr12:100055884	97124	97074	38168	1				74	P. hamadryas	Chr14:61735982	97124	97074	38168	0
	75	P. hamadryas	Chr13:3378106	97124	97074	38168	0				75	P. hamadryas	Chr14:117340022	97124	97074	38168	1
	76	P. hamadryas	Chr13:75971083	97124	97074	38168	1				76	P. hamadryas	Chr15:1486759	97124	97074	38168	0
	77	P. hamadryas	Chr13:90492681	97124	97074	38168	0				77	P. hamadryas	Chr15:22965582	97124	97074	38168	0
	78	P. hamadryas	Chr13:106216330	97124	97074	38168	1				78	P. hamadryas	Chr16:52643032	97124	97074	38168	0
	79	P. hamadryas	Chr14:61735982	97124	97074	38168	0				79	P. hamadryas	Chr17:4049090	97124	97074	38168	1
	80	P. hamadryas	Chr14:117340022	97124	97074	38168	1				80	P. hamadryas	Chr17:81564364	97124	97074	38168	0
	81	P. hamadryas	Chr15:1486759	97124	97074	38168	0				81	P. hamadryas	Chr17:85824050	97124	97074	38168	1
	82	P. hamadryas	Chr15:22965582	97124	97074	38168	0				82	P. hamadryas	Chr18:37480092	97124	97074	38168	1
	83	P. hamadryas	Chr15:111269156	97124	97074	38168	1	yes			83	P. hamadryas	Chr19:4694608	97124	97074	38168	1
	84	P. hamadryas	Chr16:52643032	97124	97074	38168	0				84	P. hamadryas	Chr19:6770622	97124	97074	38168	0
	85	P. hamadryas	Chr17:289672	97124	97074	38168	1				85	P. hamadryas	Chr19:6781098	97124	97074	38168	1
	86	P. hamadryas	Chr17:4049090	97124	97074	38168	1				86	P. hamadryas	Chr19:19847944	97124	97074	38168	0
	87	P. hamadryas	Chr17:58999726	97124	97074	38168	0				87	P. hamadryas	Chr19:23460575	97124	97074	38168	0
	88	P. hamadryas	Chr17:81564364	97124	97074	38168	0				88	P. hamadryas	Chr19:31420753	97124	97074	38168	0
	89	P. hamadryas	Chr17:85824050	97124	97074	38168	1			98	89	P. hamadryas	Chr19:48872349	97124	97074	38168	1
	90	P. hamadryas	Chr18:20464946	97124	97074	38168	1			99	90	P. hamadryas	Chr19:51161472	97124	97074	38168	0
	91	P. hamadryas	Chr18:37480092	97124	97074	38168	1			101	91	P. hamadryas	Chr20:71586173	97124	97074	38168	0
	92	P. hamadryas	Chr19:4694608	97124	97074	38168	1
	93	P. hamadryas	Chr19:6770622	97124	97074	38168	0
	94	P. hamadryas	Chr19:6781098	97124	97074	38168	1
	95	P. hamadryas	Chr19:19847944	97124	97074	38168	0
	96	P. hamadryas	Chr19:23460575	97124	97074	38168	0
	97	P. hamadryas	Chr19:31420753	97124	97074	38168	0
	98	P. hamadryas	Chr19:48872349	97124	97074	38168	1
	99	P. hamadryas	Chr19:51161472	97124	97074	38168	0
	100	P. hamadryas	Chr20:3733248	97124	97074	38168	0
	101	P. hamadryas	Chr20:71586173	97124	97074	38168	0
		Predicted Papio	Predicted insertion	P. papio	P. papio	Theropithecus	orientation	Present in				Predicted Papio	Predicted insertion	P. papio	P. papio	Theropithecus	orientation	Present in
		Species-specific	coordinate [Mmul8.0.1]	Guinea	Guinea	gelada	0 is forward	Panu_2.0				Species-specific	coordinate [Mmul8.0.1]	Guinea	Guinea	gelada	0 is forward	Panu_2.0
	1	P. papio	Chr1:359301	28547	30388	38168	0	yes			1	P. papio	Chr1:359301	28547	30388	38168	0	yes
	2	P. papio	Chr1:15518966	28547	30388	38168	0				2	P. papio	Chr1:15518966	28547	30388	38168	0
	3	P. papio	Chr1:15580116	28547	30388	38168	1				3	P. papio	Chr1:15580116	28547	30388	38168	1
	4	P. papio	Chr1:31932701	28547	30388	38168	0				4	P. papio	Chr1:129257836	28547	30388	38168	0
	5	P. papio	Chr1:44566530	28547	30388	38168	0				5	P. papio	Chr1:182873113	28547	30388	38168	1
	6	P. papio	Chr1:129257836	28547	30388	38168	0				6	P. papio	Chr2:43746567	28547	30388	38168	0
	7	P. papio	Chr1:182873113	28547	30388	38168	1				7	P. papio	Chr2:94460972	28547	30388	38168	0
	8	P. papio	Chr2:187923391	28547	30388	38168	0				8	P. papio	Chr2:187923391	28547	30388	38168	0
	9	P. papio	Chr2:192163160	28547	30388	38168	1				9	P. papio	Chr2:192163160	28547	30388	38168	1
	10	P. papio	Chr4:20643850	28547	30388	38168	0				10	P. papio	Chr3:3975995	28547	30388	38168	1
	11	P. papio	Chr4:75783342	28547	30388	38168	1				11	P. papio	Chr3:41400220	28547	30388	38168	0
	12	P. papio	Chr4:94919314	28547	30388	38168	1				12	P. papio	Chr3:55012345	28547	30388	38168	0
	13	P. papio	Chr4:134882055	28547	30388	38168	1				13	P. papio	Chr4:94919314	28547	30388	38168	1
	14	P. papio	Chr5:21898844	28547	30388	38168	0				14	P. papio	Chr4:134882055	28547	30388	38168	1
	15	P. papio	Chr5:72149112	28547	30388	38168	0	yes			15	P. papio	Chr5:21898844	28547	30388	38168	0
	16	P. papio	Chr6:32935010	28547	30388	38168	1				16	P. papio	Chr5:72149112	28547	30388	38168	0	yes
	17	P. papio	Chr6:35447019	28547	30388	38168	1			17	17	P. papio	Chr6:35447019	28547	30388	38168	1
	18	P. papio	Chr6:177467906	28547	30388	38168	1				18	P. papio	Chr6:177467906	28547	30388	38168	1
	19	P. papio	Chr7:2914009	28547	30388	38168	0				19	P. papio	Chr7:2914009	28547	30388	38168	0
	20	P. papio	Chr7:7766951	28547	30388	38168	1				20	P. papio	Chr7:24599184	28547	30388	38168	1
	21	P. papio	Chr7:24599184	28547	30388	38168	1				21	P. papio	Chr7:55300512	28547	30388	38168	1
	22	P. papio	Chr7:55300512	28547	30388	38168	1				22	P. papio	Chr7:59644557	28547	30388	38168	1	no
	23	P. papio	Chr7:109436768	28547	30388	38168	0				23	P. papio	Chr7:109436768	28547	30388	38168	0
	24	P. papio	Chr8:12000279	28547	30388	38168	0				24	P. papio	Chr7:127923747	28547	30388	38168	1	no
	25	P. papio	Chr8:41063379	28547	30388	38168	0				25	P. papio	Chr8:12000279	28547	30388	38168	0
	26	P. papio	Chr8:50236041	28547	30388	38168	0				26	P. papio	Chr8:89339314	28547	30388	38168	1
	27	P. papio	Chr8:89339314	28547	30388	38168	1				27	P. papio	Chr8:125209270	28547	30388	38168	0
	28	P. papio	Chr8:125209270	28547	30388	38168	0				28	P. papio	Chr8:125563974	28547	30388	38168	0
	29	P. papio	Chr8:125563974	28547	30388	38168	0				29	P. papio	Chr9:62423677	28547	30388	38168	1
	30	P. papio	Chr9:53286555	28547	30388	38168	1				30	P. papio	Chr9:128717122	28547	30388	38168	0
	31	P. papio	Chr9:62423677	28547	30388	38168	1				31	P. papio	Chr10:12424082	28547	30388	38168	0	yes
	32	P. papio	Chr9:64053404	28547	30388	38168	0	yes			32	P. papio	Chr10:40727986	28547	30388	38168	1
	33	P. papio	Chr9:80768028	28547	30388	38168	1				33	P. papio	Chr10:80401040	28547	30388	38168	0
	34	P. papio	Chr9:128717122	28547	30388	38168	0				34	P. papio	Chr11:11443900	28547	30388	38168	0
	35	P. papio	Chr10:40727986	28547	30388	38168	1			38	35	P. papio	Chr11:56537958	28547	30388	38168	1
	36	P. papio	Chr10:80401040	28547	30388	38168	0				36	P. papio	Chr11:95911971	28547	30388	38168	1
	37	P. papio	Chr11:11443900	28547	30388	38168	0				37	P. papio	Chr11:116567480	28547	30388	38168	0
	38	P. papio	Chr11:56537958	28547	30388	38168	1				38	P. papio	Chr11:131203017	28547	30388	38168	1
	39	P. papio	Chr11:95911971	28547	30388	38168	1				39	P. papio	Chr12:26741671	28547	30388	38168	0	no
	40	P. papio	Chr11:116567480	28547	30388	38168	0				40	P. papio	Chr13:39770976	28547	30388	38168	1
	41	P. papio	Chr11:131203017	28547	30388	38168	1			43	41	P. papio	Chr13:101930134	28547	30388	38168	0
	42	P. papio	Chr13:39770976	28547	30388	38168	1				42	P. papio	Chr13:101997257	28547	30388	38168	0
	43	P. papio	Chr13:101930134	28547	30388	38168	0				43	P. papio	Chr13:103371856	28547	30388	38168	0
	44	P. papio	Chr13:101997257	28547	30388	38168	0				44	P. papio	Chr14:33330241	28547	30388	38168	0
	45	P. papio	Chr13:103371856	28547	30388	38168	0				45	P. papio	Chr14:57577207	28547	30388	38168	0
	46	P. papio	Chr14:590435	28547	30388	38168	1				46	P. papio	Chr15:6380842	28547	30388	38168	1	yes
	47	P. papio	Chr14:33330241	28547	30388	38168	0				47	P. papio	Chr16:3119722	28547	30388	38168	1
	48	P. papio	Chr14:40191827	28547	30388	38168	1				48	P. papio	Chr16:9143867	28547	30388	38168	0
	49	P. papio	Chr14:57577207	28547	30388	38168	0				49	P. papio	Chr16:10083009	28547	30388	38168	0	no
	50	P. papio	Chr15:6380842	28547	30388	38168	1	yes			50	P. papio	Chr16:18568231	28547	30388	38168	1
	51	P. papio	Chr15:77566530	28547	30388	38168	0				51	P. papio	Chr16:20024197	28547	30388	38168	1
	52	P. papio	Chr16:3119722	28547	30388	38168	1				52	P. papio	Chr16:70183545	28547	30388	38168	0	no
	53	P. papio	Chr16:3527135	28547	30388	38168	0	yes			53	P. papio	Chr17:4282471	28547	30388	38168	0	no
	54	P. papio	Chr16:9143867	28547	30388	38168	0				54	P. papio	Chr17:27069347	28547	30388	38168	0
	55	P. papio	Chr16:18568231	28547	30388	38168	1				55	P. papio	Chr17:44693872	28547	30388	38168	0
	56	P. papio	Chr16:20024197	28547	30388	38168	1				56	P. papio	Chr17:44705463	28547	30388	38168	0
	57	P. papio	Chr16:44956410	28547	30388	38168	0	yes			57	P. papio	Chr18:61069498	28547	30388	38168	0
	58	P. papio	Chr16:77193120	28547	30388	38168	1				58	P. papio	Chr19:35716519	28547	30388	38168	1	yes
	59	P. papio	Chr17:27069347	28547	30388	38168	0				59	P. papio	Chr19:35717736	28547	30388	38168	0
	60	P. papio	Chr17:44693872	28547	30388	38168	0				60	P. papio	Chr20:51336393	28547	30388	38168	1	yes
	61	P. papio	Chr17:44705463	28547	30388	38168	0				61	P. papio	Chr20:54648746	28547	30388	38168	1	no
	62	P. papio	Chr18:61069498	28547	30388	38168	0				62	P. papio	Chr20:59559395	28547	30388	38168	1
	63	P. papio	Chr19:35716519	28547	30388	38168	1	yes			63	P. papio	Chr20:65793318	28547	30388	38168	0
	64	P. papio	Chr19:35717736	28547	30388	38168	0
	65	P. papio	Chr20:102864	28547	30388	38168	1	yes
	66	P. papio	Chr20:51336393	28547	30388	38168	1	yes
	67	P. papio	Chr20:59559395	28547	30388	38168	1
	68	P. papio	Chr20:65793318	28547	30388	38168	0
		Predicted Papio	Predicted insertion	P. cynocephalus		Theropithecus	orientation	Present in				Predicted Papio	Predicted insertion	P. cynocephalus		Theropithecus	orientation	Present in
		Species-specific	coordinate [Mmul8.0.1]	Yellow	Yellow	gelada	0 is forward	Panu_2.0				Species-specific	coordinate [Mmul8.0.1]	Yellow	Yellow	gelada	0 is forward	Panu_2.0
	1	P. cynocephalus	Chr1:97424373	16066	16098	38168	0				1	P. cynocephalus	Chr1:97424373	16066	16098	38168	0
	2	P. cynocephalus	Chr3:44880749	16066	16098	38168	1	yes			2	P. cynocephalus	Chr1:136354423	16066	16098	38168	0	no
	3	P. cynocephalus	Chr3:49928270	16066	16098	38168	0				3	P. cynocephalus	Chr2:30362512	16066	16098	38168	1	no
	4	P. cynocephalus	Chr3:59354983	16066	16098	38168	1				4	P. cynocephalus	Chr2:56916651	16066	16098	38168	0	yes
	5	P. cynocephalus	Chr3:73356670	16066	16098	38168	1				5	P. cynocephalus	Chr3:44880749	16066	16098	38168	1	yes
	6	P. cynocephalus	Chr4:25189649	16066	16098	38168	1				6	P. cynocephalus	Chr3:49928270	16066	16098	38168	0
	7	P. cynocephalus	Chr4:32484068	16066	16098	38168	1				7	P. cynocephalus	Chr3:73356670	16066	16098	38168	1
	8	P. cynocephalus	Chr4:168348723	16066	16098	38168	0			6	8	P. cynocephalus	Chr4:25189649	16066	16098	38168	1
	9	P. cynocephalus	Chr5:39491870	16066	16098	38168	1				9	P. cynocephalus	Chr4:168348723	16066	16098	38168	0
	10	P. cynocephalus	Chr6:47995297	16066	16098	38168	1				10	P. cynocephalus	Chr5:39491870	16066	16098	38168	1
	11	P. cynocephalus	Chr6:71736949	16066	16098	38168	0				11	P. cynocephalus	Chr6:47995297	16066	16098	38168	1
	12	P. cynocephalus	Chr7:73051591	16066	16098	38168	0			11	12	P. cynocephalus	Chr6:71736949	16066	16098	38168	0
	13	P. cynocephalus	Chr7:146239974	16066	16098	38168	1				13	P. cynocephalus	Chr7:146239974	16066	16098	38168	1
	14	P. cynocephalus	Chr8:30235198	16066	16098	38168	1			14	14	P. cynocephalus	Chr8:30235198	16066	16098	38168	1
	15	P. cynocephalus	Chr8:80930760	16066	16098	38168	0				15	P. cynocephalus	Chr9:11070712	16066	16098	38168	1
	16	P. cynocephalus	Chr9:11070712	16066	16098	38168	1				16	P. cynocephalus	Chr10:59941162	16066	16098	38168	0	no
	17	P. cynocephalus	Chr11:7150777	16066	16098	38168	1	has NPI			17	P. cynocephalus	Chr11:7150777	16066	16098	38168	1	has NPI
	18	P. cynocephalus	Chr11:74475517	16066	16098	38168	1	yes			18	P. cynocephalus	Chr12:79211484	16066	16098	38168	1
	19	P. cynocephalus	Chr12:79211484	16066	16098	38168	1				19	P. cynocephalus	Chr12:115918695	16066	16098	38168	1	no
	20	P. cynocephalus	Chr12:121036607	16066	16098	38168	0				20	P. cynocephalus	Chr12:121036607	16066	16098	38168	0
	21	P. cynocephalus	Chr14:79785740	16066	16098	38168	0				21	P. cynocephalus	Chr13:31287591	16066	16098	38168	0	no
	22	P. cynocephalus	Chr15:7985660	16066	16098	38168	0				22	P. cynocephalus	Chr15:7985660	16066	16098	38168	0
	23	P. cynocephalus	Chr15:81073928	16066	16098	38168	1				23	P. cynocephalus	Chr15:81073928	16066	16098	38168	0
	24	P. cynocephalus	Chr18:27172176	16066	16098	38168	0				24	P. cynocephalus	Chr16:68007649	16066	16098	38168	1	no
	25	P. cynocephalus	Chr19:12370434	16066	16098	38168	1	has NPI			25	P. cynocephalus	Chr18:27172176	16066	16098	38168	0
	26	P. cynocephalus	Chr20:27590704	16066	16098	38168	0
		Predicted Papio	Predicted insertion	P. ursinus		Theropithecus	orientation	Present in				Predicted Papio	Predicted insertion	P. ursinus		Theropithecus	orientation	Present in
		Species-specific	coordinate [Mmul8.0.1]	Chacma	Chacma	gelada	0 is forward	Panu_2.0				Species-specific	coordinate [Mmul8.0.1]	Chacma	Chacma	gelada	0 is forward	Panu_2.0
	1	P. ursinus	Chr1:8126471	28697	28755	38168	0	yes			1	P. ursinus	Chr1:8126471	28697	28755	38168	0	yes
	2	P. ursinus	Chr1:18651287	28697	28755	38168	1				2	P. ursinus	Chr1:31095559	28697	28755	38168	1
	3	P. ursinus	Chr1:31095559	28697	28755	38168	1				3	P. ursinus	Chr1:136368875	28697	28755	38168	0
	4	P. ursinus	Chr1:61903949	28697	28755	38168	0				4	P. ursinus	Chr1:141231482	28697	28755	38168	0
	5	P. ursinus	Chr1:136368875	28697	28755	38168	0				5	P. ursinus	Chr2:19525943	28697	28755	38168	1
	6	P. ursinus	Chr1:141231482	28697	28755	38168	0				6	P. ursinus	Chr2:51491455	28697	28755	38168	1
	7	P. ursinus	Chr1:212528473	28697	28755	38168	0				7	P. ursinus	Chr2:75201422	28697	28755	38168	0
	8	P. ursinus	Chr2:19525943	28697	28755	38168	1				8	P. ursinus	Chr2:141867672	28697	28755	38168	1
	9	P. ursinus	Chr2:51491455	28697	28755	38168	1				9	P. ursinus	Chr2:179113850	28697	28755	38168	1	yes
	10	P. ursinus	Chr2:54936995	28697	28755	38168	0			15	10	P. ursinus	Chr3:130922256	28697	28755	38168	0
	11	P. ursinus	Chr2:75201422	28697	28755	38168	0				11	P. ursinus	Chr4:111386954	28697	28755	38168	1
	12	P. ursinus	Chr2:141867672	28697	28755	38168	1				12	P. ursinus	Chr4:129668552	28697	28755	38168	1
	13	P. ursinus	Chr2:179113850	28697	28755	38168	1	yes			13	P. ursinus	Chr4:163483369	28697	28755	38168	0	no
	14	P. ursinus	Chr3:46335129	28697	28755	38168	0				14	P. ursinus	Chr5:2741360	28697	28755	38168	0	no
	15	P. ursinus	Chr3:130922256	28697	28755	38168	0				15	P. ursinus	Chr5:128474353	28697	28755	38168	0	no
	16	P. ursinus	Chr3:134718249	28697	28755	38168	1				16	P. ursinus	Chr5:145562250	28697	28755	38168	0	has NPI
	17	P. ursinus	Chr4:111386954	28697	28755	38168	1				17	P. ursinus	Chr7:6043817	28697	28755	38168	0
	18	P. ursinus	Chr4:129668552	28697	28755	38168	1				18	P. ursinus	Chr7:15345734	28697	28755	38168	1
	19	P. ursinus	Chr5:25099586	28697	28755	38168	1				19	P. ursinus	Chr7:17180621	28697	28755	38168	1
	20	P. ursinus	Chr5:83246212	28697	28755	38168	0				20	P. ursinus	Chr7:131972272	28697	28755	38168	0
	21	P. ursinus	Chr5:145562250	28697	28755	38168	0	has NPI			21	P. ursinus	Chr8:32282162	28697	28755	38168	1
	22	P. ursinus	Chr6:171071697	28697	28755	38168	1	yes (Sp)			22	P. ursinus	Chr9:73057837	28697	28755	38168	0
	23	P. ursinus	Chr7:6043817	28697	28755	38168	0			33	23	P. ursinus	Chr10:2459762	28697	28755	38168	1
	24	P. ursinus	Chr7:15345734	28697	28755	38168	1				24	P. ursinus	Chr10:19952570	28697	28755	38168	1
	25	P. ursinus	Chr7:17180621	28697	28755	38168	1				25	P. ursinus	Chr11:50491623	28697	28755	38168	0
	26	P. ursinus	Chr7:131972272	28697	28755	38168	0				26	P. ursinus	Chr11:51878076	28697	28755	38168	1	no
	27	P. ursinus	Chr8:32282162	28697	28755	38168	1				27	P. ursinus	Chr11:123371103	28697	28755	38168	1
	28	P. ursinus	Chr8:94995124	28697	28755	38168	0				28	P. ursinus	Chr12:51962831	28697	28755	38168	0	no
	29	P. ursinus	Chr8:96340375	28697	28755	38168	0				29	P. ursinus	Chr12:59955323	28697	28755	38168	1
	30	P. ursinus	Chr9:38649130	28697	28755	38168	0	yes			30	P. ursinus	Chr13:89274978	28697	28755	38168	0
	31	P. ursinus	Chr9:73057837	28697	28755	38168	0				31	P. ursinus	Chr13:89996139	28697	28755	38168	1	yes
	32	P. ursinus	Chr9:129088928	28697	28755	38168	0			43	32	P. ursinus	Chr13:105026542	28697	28755	38168	0
	33	P. ursinus	Chr10:2459762	28697	28755	38168	1				33	P. ursinus	Chr14:44083571	28697	28755	38168	0
	34	P. ursinus	Chr10:19952570	28697	28755	38168	1				34	P. ursinus	Chr14:111578573	28697	28755	38168	1
	35	P. ursinus	Chr11:2960465	28697	28755	38168	0				35	P. ursinus	Chr15:108990570	28697	28755	38168	1
	36	P. ursinus	Chr11:50491623	28697	28755	38168	0				36	P. ursinus	Chr16:15753478	28697	28755	38168	0
	37	P. ursinus	Chr11:108448376	28697	28755	38168	0				37	P. ursinus	Chr16:46188318	28697	28755	38168	1
	38	P. ursinus	Chr11:123371103	28697	28755	38168	1				38	P. ursinus	Chr19:7708032	28697	28755	38168	1
	39	P. ursinus	Chr12:59955323	28697	28755	38168	1				39	P. ursinus	Chr19:21427425	28697	28755	38168	0
	40	P. ursinus	Chr13:27452672	28697	28755	38168	0				40	P. ursinus	Chr20:3699291	28697	28755	38168	0
	41	P. ursinus	Chr13:89274978	28697	28755	38168	0				41	P. ursinus	Chr20:57083916	28697	28755	38168	1
	42	P. ursinus	Chr13:89996139	28697	28755	38168	1	yes			42	P. ursinus	Chr20:66919789	28697	28755	38168	1
	43	P. ursinus	Chr13:105026542	28697	28755	38168	0
	44	P. ursinus	Chr14:44083571	28697	28755	38168	0
	45	P. ursinus	Chr14:71527592	28697	28755	38168	0
	46	P. ursinus	Chr14:111578573	28697	28755	38168	1
	47	P. ursinus	Chr15:48493179	28697	28755	38168	0
	48	P. ursinus	Chr15:108990570	28697	28755	38168	1
	49	P. ursinus	Chr16:15753478	28697	28755	38168	0
	50	P. ursinus	Chr16:46188318	28697	28755	38168	1
	51	P. ursinus	Chr17:87253739	28697	28755	38168	1
	52	P. ursinus	Chr19:7708032	28697	28755	38168	1
	53	P. ursinus	Chr19:21427425	28697	28755	38168	0
	54	P. ursinus	Chr19:44584712	28697	28755	38168	0	yes
	55	P. ursinus	Chr20:3699291	28697	28755	38168	0
	56	P. ursinus	Chr20:57083916	28697	28755	38168	1
	57	P. ursinus	Chr20:66919789	28697	28755	38168	1
		Predicted Papio	Predicted insertion	P. kindae		Theropithecus	orientation	Present in				Predicted Papio	Predicted insertion	P. kindae		Theropithecus	orientation	Present in
		Species-specific	coordinate [Mmul8.0.1]	Kinda	Kinda	gelada	0 is forward	Panu_2.0				Species-specific	coordinate [Mmul8.0.1]	Kinda	Kinda	gelada	0 is forward	Panu_2.0
	1	P. kindae	Chr1:11854228	34449	34474	38168	1				1	P. kindae	Chr1:11854228	34449	34474	38168	1
	2	P. kindae	Chr1:14454858	34449	34474	38168	1				2	P. kindae	Chr1:14454858	34449	34474	38168	1
	3	P. kindae	Chr1:14683912	34449	34474	38168	1	has NPI			3	P. kindae	Chr1:14683912	34449	34474	38168	1	has NPI
	4	P. kindae	Chr1:43719172	34449	34474	38168	1				4	P. kindae	Chr1:38519179	34449	34474	38168	1	no
	5	P. kindae	Chr1:50438483	34449	34474	38168	0				5	P. kindae	Chr1:38747530	34449	34474	38168	1	no
	6	P. kindae	Chr1:52658820	34449	34474	38168	1				6	P. kindae	Chr1:43719172	34449	34474	38168	1
	7	P. kindae	Chr1:55089830	34449	34474	38168	0	yes			7	P. kindae	Chr1:50438483	34449	34474	38168	0
	8	P. kindae	Chr1:61414221	34449	34474	38168	0				8	P. kindae	Chr1:55089830	34449	34474	38168	0	yes
	9	P. kindae	Chr1:69887241	34449	34474	38168	0			9	9	P. kindae	Chr1:69887241	34449	34474	38168	0
	10	P. kindae	Chr1:104590267	34449	34474	38168	0				10	P. kindae	Chr1:112923999	34449	34474	38168	1
	11	P. kindae	Chr1:112923999	34449	34474	38168	1				11	P. kindae	Chr1:125678829	34449	34474	38168	1	yes
	12	P. kindae	Chr1:125753120	34449	34474	38168	0	yes			12	P. kindae	Chr1:125753120	34449	34474	38168	0	yes
	13	P. kindae	Chr1:142017607	34449	34474	38168	0				13	P. kindae	Chr1:126299623	34449	34474	38168	1	yes
	14	P. kindae	Chr1:164293464	34449	34474	38168	0				14	P. kindae	Chr1:130240783	34449	34474	38168	1	no
	15	P. kindae	Chr1:164293736	34449	34474	38168	0				15	P. kindae	Chr1:142017607	34449	34474	38168	0
	16	P. kindae	Chr1:177675231	34449	34474	38168	1	has NPI			16	P. kindae	Chr1:164293464	34449	34474	38168	0
	17	P. kindae	Chr1:179336270	34449	34474	38168	0				17	P. kindae	Chr1:164293736	34449	34474	38168	0
	18	P. kindae	Chr1:199161789	34449	34474	38168	1				18	P. kindae	Chr1:166198763	34449	34474	38168	0	no
	19	P. kindae	Chr1:209146575	34449	34474	38168	0				19	P. kindae	Chr1:177675231	34449	34474	38168	1	has NPI
	20	P. kindae	Chr2:670367	34449	34474	38168	1				20	P. kindae	Chr1:209146575	34449	34474	38168	0
	21	P. kindae	Chr2:12886463	34449	34474	38168	1	yes			21	P. kindae	Chr2:670367	34449	34474	38168	1
	22	P. kindae	Chr2:51459078	34449	34474	38168	0				22	P. kindae	Chr2:12886463	34449	34474	38168	1	yes
	23	P. kindae	Chr2:80133484	34449	34474	38168	0				23	P. kindae	Chr2:49794294	34449	34474	38168	1	no
	24	P. kindae	Chr2:83735000	34449	34474	38168	1				24	P. kindae	Chr2:51459078	34449	34474	38168	0
	25	P. kindae	Chr2:94234650	34449	34474	38168	1				25	P. kindae	Chr2:56922267	34449	34474	38168	1	no
	26	P. kindae	Chr2:101318423	34449	34474	38168	0				26	P. kindae	Chr2:83735000	34449	34474	38168	1
	27	P. kindae	Chr2:105637867	34449	34474	38168	0				27	P. kindae	Chr2:101318423	34449	34474	38168	0
	28	P. kindae	Chr2:118272144	34449	34474	38168	0				28	P. kindae	Chr2:156681747	34449	34474	38168	1
	29	P. kindae	Chr2:140830728	34449	34474	38168	0				29	P. kindae	Chr2:183197965	34449	34474	38168	1
	30	P. kindae	Chr2:156681747	34449	34474	38168	1				30	P. kindae	Chr2:203340903	34449	34474	38168	1
	31	P. kindae	Chr2:171760100	34449	34474	38168	0				31	P. kindae	Chr3:17877394	34449	34474	38168	1	yes
	32	P. kindae	Chr2:183197965	34449	34474	38168	1				32	P. kindae	Chr3:21169574	34449	34474	38168	1	no
	33	P. kindae	Chr2:203340903	34449	34474	38168	1				33	P. kindae	Chr3:34574881	34449	34474	38168	0
	34	P. kindae	Chr3:21818287	34449	34474	38168	0				34	P. kindae	Chr3:39819382	34449	34474	38168	1
	35	P. kindae	Chr3:34574881	34449	34474	38168	0				35	P. kindae	Chr3:42948219	34449	34474	38168	0	no
	36	P. kindae	Chr3:39819382	34449	34474	38168	1				36	P. kindae	Chr3:47998820	34449	34474	38168	0	no
	37	P. kindae	Chr3:40942151	34449	34474	38168	1				37	P. kindae	Chr3:53871583	34449	34474	38168	0
	38	P. kindae	Chr3:53871583	34449	34474	38168	0				38	P. kindae	Chr3:72506817	34449	34474	38168	1
	39	P. kindae	Chr3:72506817	34449	34474	38168	1				39	P. kindae	Chr3:76247014	34449	34474	38168	0	no
	40	P. kindae	Chr3:77011105	34449	34474	38168	1				40	P. kindae	Chr3:84672149	34449	34474	38168	1
	41	P. kindae	Chr3:84672149	34449	34474	38168	1				41	P. kindae	Chr3:129316526	34449	34474	38168	1
	42	P. kindae	Chr3:111513103	34449	34474	38168	0				42	P. kindae	Chr3:136126940	34449	34474	38168	0	no
	43	P. kindae	Chr3:129316526	34449	34474	38168	1				43	P. kindae	Chr3:164715905	34449	34474	38168	1
	44	P. kindae	Chr3:152633341	34449	34474	38168	1				44	P. kindae	Chr3:170737743	34449	34474	38168	1	yes
	45	P. kindae	Chr3:164715905	34449	34474	38168	1				45	P. kindae	Chr3:175805818	34449	34474	38168	0	yes
	46	P. kindae	Chr3:170737743	34449	34474	38168	1	yes			46	P. kindae	Chr3:176986876	34449	34474	38168	1
	47	P. kindae	Chr3:175805818	34449	34474	38168	0	yes			47	P. kindae	Chr3:182957564	34449	34474	38168	1	no
	48	P. kindae	Chr3:176986876	34449	34474	38168	1				48	P. kindae	Chr4:4239851	34449	34474	38168	0	no
	49	P. kindae	Chr4:24943146	34449	34474	38168	1				49	P. kindae	Chr4:25015167	34449	34474	38168	0	yes
	50	P. kindae	Chr4:31044103	34449	34474	38168	1	yes			50	P. kindae	Chr4:31044103	34449	34474	38168	1	yes
	51	P. kindae	Chr4:31053723	34449	34474	38168	0				51	P. kindae	Chr4:31053723	34449	34474	38168	0
	52	P. kindae	Chr4:31171546	34449	34474	38168	0	yes			52	P. kindae	Chr4:31171546	34449	34474	38168	0	yes
	53	P. kindae	Chr4:34515683	34449	34474	38168	1			53	53	P. kindae	Chr4:34515683	34449	34474	38168	1
	54	P. kindae	Chr4:39562641	34449	34474	38168	0				54	P. kindae	Chr4:58888423	34449	34474	38168	1
	55	P. kindae	Chr4:58888423	34449	34474	38168	1				55	P. kindae	Chr4:64186335	34449	34474	38168	1	no
	56	P. kindae	Chr4:71564091	34449	34474	38168	1				56	P. kindae	Chr4:71564091	34449	34474	38168	1
	57	P. kindae	Chr4:97170561	34449	34474	38168	0				57	P. kindae	Chr4:117850688	34449	34474	38168	1
	58	P. kindae	Chr4:117850688	34449	34474	38168	1				58	P. kindae	Chr4:131929172	34449	34474	38168	0	no
	59	P. kindae	Chr4:140127439	34449	34474	38168	0	yes			59	P. kindae	Chr4:140127439	34449	34474	38168	0	yes
	60	P. kindae	Chr4:146216818	34449	34474	38168	1				60	P. kindae	Chr4:147266514	34449	34474	38168	0
	61	P. kindae	Chr4:147266514	34449	34474	38168	0				61	P. kindae	Chr4:153514466	34449	34474	38168	1
	62	P. kindae	Chr4:153514466	34449	34474	38168	1				62	P. kindae	Chr4:164658129	34449	34474	38168	1
	63	P. kindae	Chr4:164658129	34449	34474	38168	1				63	P. kindae	Chr5:2408002	34449	34474	38168	0
	64	P. kindae	Chr5:2408002	34449	34474	38168	0				64	P. kindae	Chr5:6991064	34449	34474	38168	0
	65	P. kindae	Chr5:6991064	34449	34474	38168	0				65	P. kindae	Chr5:11506492	34449	34474	38168	0	yes
	66	P. kindae	Chr5:11506492	34449	34474	38168	0	yes			66	P. kindae	Chr5:55607839	34449	34474	38168	0
	67	P. kindae	Chr5:55607839	34449	34474	38168	0				67	P. kindae	Chr5:69225307	34449	34474	38168	0	yes
	68	P. kindae	Chr5:69225307	34449	34474	38168	0	yes			68	P. kindae	Chr5:74775283	34449	34474	38168	0	yes
	69	P. kindae	Chr5:74775283	34449	34474	38168	0	yes		70	69	P. kindae	Chr5:77595235	34449	34474	38168	0
	70	P. kindae	Chr5:77595235	34449	34474	38168	0				70	P. kindae	Chr5:81203758	34449	34474	38168	1
	71	P. kindae	Chr5:80401681	34449	34474	38168	0				71	P. kindae	Chr5:85331685	34449	34474	38168	0
	72	P. kindae	Chr5:81203758	34449	34474	38168	1				72	P. kindae	Chr5:93383564	34449	34474	38168	0
	73	P. kindae	Chr5:85331685	34449	34474	38168	0				73	P. kindae	Chr5:102081075	34449	34474	38168	0	no
	74	P. kindae	Chr5:93383564	34449	34474	38168	0				74	P. kindae	Chr5:158703252	34449	34474	38168	1
	75	P. kindae	Chr5:119774789	34449	34474	38168	0				75	P. kindae	Chr5:164080510	34449	34474	38168	0
	76	P. kindae	Chr5:139264061	34449	34474	38168	0				76	P. kindae	Chr5:175853789	34449	34474	38168	0	no
	77	P. kindae	Chr5:157687508	34449	34474	38168	1				77	P. kindae	Chr5:186894463	34449	34474	38168	0
	78	P. kindae	Chr5:158703252	34449	34474	38168	1				78	P. kindae	Chr6:21387296	34449	34474	38168	0	no
	79	P. kindae	Chr5:164080510	34449	34474	38168	0				79	P. kindae	Chr6:63467164	34449	34474	38168	0
	80	P. kindae	Chr5:169497887	34449	34474	38168	1				80	P. kindae	Chr6:115155804	34449	34474	38168	1
	81	P. kindae	Chr5:186894463	34449	34474	38168	0				81	P. kindae	Chr6:138501440	34449	34474	38168	1	yes
	82	P. kindae	Chr6:24418525	34449	34474	38168	1				82	P. kindae	Chr6:159049123	34449	34474	38168	1
	83	P. kindae	Chr6:41302072	34449	34474	38168	1				83	P. kindae	Chr6:166815691	34449	34474	38168	1
	84	P. kindae	Chr6:63467164	34449	34474	38168	0				84	P. kindae	Chr6:176457376	34449	34474	38168	0
	85	P. kindae	Chr6:91247961	34449	34474	38168	1				85	P. kindae	Chr7:16735132	34449	34474	38168	1	no
	86	P. kindae	Chr6:108495544	34449	34474	38168	1				86	P. kindae	Chr7:21168064	34449	34474	38168	1	no
	87	P. kindae	Chr6:115155804	34449	34474	38168	1				87	P. kindae	Chr7:43902867	34449	34474	38168	1
	88	P. kindae	Chr6:138501440	34449	34474	38168	1	yes			88	P. kindae	Chr8:39690221	34449	34474	38168	1
	89	P. kindae	Chr6:159049123	34449	34474	38168	1				89	P. kindae	Chr8:72292374	34449	34474	38168	1
	90	P. kindae	Chr6:166815691	34449	34474	38168	1				90	P. kindae	Chr8:92973914	34449	34474	38168	0	no
	91	P. kindae	Chr6:176457376	34449	34474	38168	0				91	P. kindae	Chr8:121477397	34449	34474	38168	0	yes
	92	P. kindae	Chr7:26987335	34449	34474	38168	1				92	P. kindae	Chr8:136064643	34449	34474	38168	0
	93	P. kindae	Chr7:43902867	34449	34474	38168	1			109	93	P. kindae	Chr8:143835717	34449	34474	38168	0
	94	P. kindae	Chr7:87568809	34449	34474	38168	1				94	P. kindae	Chr9:30457199	34449	34474	38168	0	yes
	95	P. kindae	Chr7:107103120	34449	34474	38168	1				95	P. kindae	Chr9:40073553	34449	34474	38168	1
	96	P. kindae	Chr7:164299158	34449	34474	38168	1				96	P. kindae	Chr9:62299697	34449	34474	38168	0
	97	P. kindae	Chr7:164316128	34449	34474	38168	0				97	P. kindae	Chr9:65060617	34449	34474	38168	1
	98	P. kindae	Chr7:165412897	34449	34474	38168	1				98	P. kindae	Chr9:76977948	34449	34474	38168	0
	99	P. kindae	Chr8:8519819	34449	34474	38168	0				99	P. kindae	Chr9:87131139	34449	34474	38168	1
	100	P. kindae	Chr8:30492398	34449	34474	38168	1			122	100	P. kindae	Chr9:114750927	34449	34474	38168	0
	101	P. kindae	Chr8:39690221	34449	34474	38168	1				101	P. kindae	Chr9:117893135	34449	34474	38168	0
	102	P. kindae	Chr8:44598855	34449	34474	38168	1	yes			102	P. kindae	Chr9:124947872	34449	34474	38168	0
	103	P. kindae	Chr8:72292374	34449	34474	38168	1				103	P. kindae	Chr10:29480113	34449	34474	38168	1
	104	P. kindae	Chr8:75422097	34449	34474	38168	1				104	P. kindae	Chr10:29490970	34449	34474	38168	0
	105	P. kindae	Chr8:77805030	34449	34474	38168	1				105	P. kindae	Chr10:37448114	34449	34474	38168	0	no
	106	P. kindae	Chr8:121477397	34449	34474	38168	0	yes			106	P. kindae	Chr10:59860457	34449	34474	38168	0
	107	P. kindae	Chr8:129367355	34449	34474	38168	1				107	P. kindae	Chr10:59870424	34449	34474	38168	1
	108	P. kindae	Chr8:136064643	34449	34474	38168	0				108	P. kindae	Chr10:63641541	34449	34474	38168	1	no
	109	P. kindae	Chr8:143835717	34449	34474	38168	0				109	P. kindae	Chr10:79479093	34449	34474	38168	1	no
	110	P. kindae	Chr9:13709715	34449	34474	38168	1				110	P. kindae	Chr10:83200003	34449	34474	38168	0	yes
	111	P. kindae	Chr9:30457199	34449	34474	38168	0	yes			111	P. kindae	Chr10:88359218	34449	34474	38168	0	no
	112	P. kindae	Chr9:40073553	34449	34474	38168	1				112	P. kindae	Chr10:88487783	34449	34474	38168	0
	113	P. kindae	Chr9:40937191	34449	34474	38168	1				113	P. kindae	Chr10:90313061	34449	34474	38168	0	no
	114	P. kindae	Chr9:49956937	34449	34474	38168	1				114	P. kindae	Chr11:10908651	34449	34474	38168	1
	115	P. kindae	Chr9:59088433	34449	34474	38168	1				115	P. kindae	Chr11:12272349	34449	34474	38168	1	yes
	116	P. kindae	Chr9:62299697	34449	34474	38168	0				116	P. kindae	Chr11:47545976	34449	34474	38168	1	no
	117	P. kindae	Chr9:65060617	34449	34474	38168	1				117	P. kindae	Chr11:68396908	34449	34474	38168	1	no
	118	P. kindae	Chr9:76977948	34449	34474	38168	0				118	P. kindae	Chr11:80536915	34449	34474	38168	0	yes
	119	P. kindae	Chr9:81212721	34449	34474	38168	0				119	P. kindae	Chr11:99257230	34449	34474	38168	1
	120	P. kindae	Chr9:85544984	34449	34474	38168	1				120	P. kindae	Chr11:99299059	34449	34474	38168	1	no
	121	P. kindae	Chr9:87131139	34449	34474	38168	1				121	P. kindae	Chr11:121992127	34449	34474	38168	1	yes
	122	P. kindae	Chr9:114750927	34449	34474	38168	0				122	P. kindae	Chr11:123403099	34449	34474	38168	0
	123	P. kindae	Chr9:117893135	34449	34474	38168	0				123	P. kindae	Chr12:37817378	34449	34474	38168	1
	124	P. kindae	Chr9:124947872	34449	34474	38168	0			145	124	P. kindae	Chr12:57734910	34449	34474	38168	0
	125	P. kindae	Chr10:437633	34449	34474	38168	1				125	P. kindae	Chr12:62250590	34449	34474	38168	1
	126	P. kindae	Chr10:29480113	34449	34474	38168	1				126	P. kindae	Chr12:105183284	34449	34474	38168	0	yes
	127	P. kindae	Chr10:29490970	34449	34474	38168	0				127	P. kindae	Chr12:115767050	34449	34474	38168	0
	128	P. kindae	Chr10:36807034	34449	34474	38168	1				128	P. kindae	Chr13:29136496	34449	34474	38168	1
	129	P. kindae	Chr10:59860457	34449	34474	38168	0				129	P. kindae	Chr13:36447227	34449	34474	38168	0
	130	P. kindae	Chr10:59870424	34449	34474	38168	1				130	P. kindae	Chr13:42752311	34449	34474	38168	1
	131	P. kindae	Chr10:83200003	34449	34474	38168	0	yes			131	P. kindae	Chr13:62543664	34449	34474	38168	1
	132	P. kindae	Chr10:88487783	34449	34474	38168	0				132	P. kindae	Chr13:63045911	34449	34474	38168	1	yes
	133	P. kindae	Chr11:971335	34449	34474	38168	0				133	P. kindae	Chr13:71077233	34449	34474	38168	1
	134	P. kindae	Chr11:10908651	34449	34474	38168	1				134	P. kindae	Chr13:74846937	34449	34474	38168	1
	135	P. kindae	Chr11:59465063	34449	34474	38168	1				135	P. kindae	Chr14:39349971	34449	34474	38168	0	yes
	136	P. kindae	Chr11:62133443	34449	34474	38168	1			166	136	P. kindae	Chr14:48313997	34449	34474	38168	1
	137	P. kindae	Chr11:77506146	34449	34474	38168	0				137	P. kindae	Chr14:64129677	34449	34474	38168	0
	138	P. kindae	Chr11:80536915	34449	34474	38168	0	yes			138	P. kindae	Chr14:65447944	34449	34474	38168	0	no
	139	P. kindae	Chr11:99257230	34449	34474	38168	1				139	P. kindae	Chr14:100219462	34449	34474	38168	0
	140	P. kindae	Chr11:118272357	34449	34474	38168	0				140	P. kindae	Chr14:104219900	34449	34474	38168	0	yes
	141	P. kindae	Chr11:123403099	34449	34474	38168	0				141	P. kindae	Chr15:6517393	34449	34474	38168	1	yes
	142	P. kindae	Chr12:31681148	34449	34474	38168	0				142	P. kindae	Chr15:10523467	34449	34474	38168	1
	143	P. kindae	Chr12:37817378	34449	34474	38168	1			180	143	P. kindae	Chr15:31982164	34449	34474	38168	0
	144	P. kindae	Chr12:44214429	34449	34474	38168	1				144	P. kindae	Chr15:32770130	34449	34474	38168	0	yes
	145	P. kindae	Chr12:57734910	34449	34474	38168	0				145	P. kindae	Chr15:72423719	34449	34474	38168	1
	146	P. kindae	Chr12:61101720	34449	34474	38168	0				146	P. kindae	Chr15:109111151	34449	34474	38168	1
	147	P. kindae	Chr12:62250590	34449	34474	38168	1				147	P. kindae	Chr16:4612228	34449	34474	38168	0	yes
	148	P. kindae	Chr12:79806312	34449	34474	38168	0				148	P. kindae	Chr16:12802958	34449	34474	38168	0
	149	P. kindae	Chr12:102309316	34449	34474	38168	1				149	P. kindae	Chr16:44054949	34449	34474	38168	1	yes
	150	P. kindae	Chr12:115767050	34449	34474	38168	0				150	P. kindae	Chr16:49287645	34449	34474	38168	0
	151	P. kindae	Chr13:823323	34449	34474	38168	1				151	P. kindae	Chr16:55274085	34449	34474	38168	0
	152	P. kindae	Chr13:2046057	34449	34474	38168	0				152	P. kindae	Chr16:58649925	34449	34474	38168	1	no
	153	P. kindae	Chr13:2686241	34449	34474	38168	1				153	P. kindae	Chr16:68461006	34449	34474	38168	1
	154	P. kindae	Chr13:4522965	34449	34474	38168	0			199	154	P. kindae	Chr16:70388780	34449	34474	38168	0
	155	P. kindae	Chr13:29136496	34449	34474	38168	1				155	P. kindae	Chr16:74165580	34449	34474	38168	0
	156	P. kindae	Chr13:36447227	34449	34474	38168	0				156	P. kindae	Chr17:129022	34449	34474	38168	0	yes
	157	P. kindae	Chr13:42752311	34449	34474	38168	1				157	P. kindae	Chr17:7796353	34449	34474	38168	0
	158	P. kindae	Chr13:62543664	34449	34474	38168	1				158	P. kindae	Chr17:8942720	34449	34474	38168	0
	159	P. kindae	Chr13:65805540	34449	34474	38168	0				159	P. kindae	Chr17:28054195	34449	34474	38168	1
	160	P. kindae	Chr13:69282722	34449	34474	38168	0				160	P. kindae	Chr17:48053364	34449	34474	38168	1
	161	P. kindae	Chr13:71077233	34449	34474	38168	1				161	P. kindae	Chr17:77333135	34449	34474	38168	1	yes
	162	P. kindae	Chr13:74846937	34449	34474	38168	1				162	P. kindae	Chr18:21758839	34449	34474	38168	1	no
	163	P. kindae	Chr13:82259520	34449	34474	38168	1				163	P. kindae	Chr18:35849937	34449	34474	38168	1	no
	164	P. kindae	Chr14:6922746	34449	34474	38168	1				164	P. kindae	Chr18:50075831	34449	34474	38168	1
	165	P. kindae	Chr14:22048786	34449	34474	38168	1				165	P. kindae	Chr18:52534626	34449	34474	38168	1	no
	166	P. kindae	Chr14:48313997	34449	34474	38168	1				166	P. kindae	Chr18:64755022	34449	34474	38168	1	yes
	167	P. kindae	Chr14:64129677	34449	34474	38168	0				167	P. kindae	Chr19:96055	34449	34474	38168	0
	168	P. kindae	Chr14:72858811	34449	34474	38168	0			213	168	P. kindae	Chr19:2954909	34449	34474	38168	1
	169	P. kindae	Chr14:100219462	34449	34474	38168	0				169	P. kindae	Chr19:3913661	34449	34474	38168	0
	170	P. kindae	Chr14:103082755	34449	34474	38168	0				170	P. kindae	Chr19:6497403	34449	34474	38168	1
	171	P. kindae	Chr14:104219900	34449	34474	38168	0	yes			171	P. kindae	Chr19:21707154	34449	34474	38168	0	yes
	172	P. kindae	Chr14:105819537	34449	34474	38168	1				172	P. kindae	Chr19:22366882	34449	34474	38168	1
	173	P. kindae	Chr14:111874751	34449	34474	38168	0				173	P. kindae	Chr19:25402937	34449	34474	38168	0
	174	P. kindae	Chr14:122794728	34449	34474	38168	0				174	P. kindae	Chr19:32207768	34449	34474	38168	1	has NPI
	175	P. kindae	Chr14:125510504	34449	34474	38168	0				175	P. kindae	Chr19:53452441	34449	34474	38168	1
	176	P. kindae	Chr15:6517393	34449	34474	38168	1	yes			176	P. kindae	Chr20:3715426	34449	34474	38168	1	has NPI
	177	P. kindae	Chr15:10523467	34449	34474	38168	1				177	P. kindae	Chr20:18524179	34449	34474	38168	1
	178	P. kindae	Chr15:11546831	34449	34474	38168	0				178	P. kindae	Chr20:23596849	34449	34474	38168	1
	179	P. kindae	Chr15:29914552	34449	34474	38168	0				179	P. kindae	Chr20:24021565	34449	34474	38168	1
	180	P. kindae	Chr15:31982164	34449	34474	38168	0				180	P. kindae	Chr20:25237568	34449	34474	38168	1
	181	P. kindae	Chr15:32770130	34449	34474	38168	0	yes			181	P. kindae	Chr20:28655223	34449	34474	38168	1	yes
	182	P. kindae	Chr15:36001889	34449	34474	38168	1				182	P. kindae	Chr20:30372157	34449	34474	38168	0
	183	P. kindae	Chr15:72423719	34449	34474	38168	1				183	P. kindae	Chr20:52372477	34449	34474	38168	1
	184	P. kindae	Chr15:86044188	34449	34474	38168	1				184	P. kindae	Chr20:56824585	34449	34474	38168	0
	185	P. kindae	Chr15:97315211	34449	34474	38168	0				185	P. kindae	Chr20:71202567	34449	34474	38168	0	no
	186	P. kindae	Chr15:109111151	34449	34474	38168	1			236	186	P. kindae	Chr20:71475255	34449	34474	38168	0
	187	P. kindae	Chr16:7757830	34449	34474	38168	1				187	P. kindae	Chr20:74781428	34449	34474	38168	0	yes
	188	P. kindae	Chr16:12802958	34449	34474	38168	0
	189	P. kindae	Chr16:21104079	34449	34474	38168	1
	190	P. kindae	Chr16:31373711	34449	34474	38168	1
	191	P. kindae	Chr16:44054949	34449	34474	38168	1	yes
	192	P. kindae	Chr16:49287645	34449	34474	38168	0
	193	P. kindae	Chr16:53383985	34449	34474	38168	1
	194	P. kindae	Chr16:55274085	34449	34474	38168	0
	195	P. kindae	Chr16:62765287	34449	34474	38168	0
	196	P. kindae	Chr16:65998290	34449	34474	38168	0
	197	P. kindae	Chr16:67346766	34449	34474	38168	0
	198	P. kindae	Chr16:68461006	34449	34474	38168	1
	199	P. kindae	Chr16:70388780	34449	34474	38168	0
	200	P. kindae	Chr16:74165580	34449	34474	38168	0
	201	P. kindae	Chr17:129022	34449	34474	38168	0	yes
	202	P. kindae	Chr17:7796353	34449	34474	38168	0
	203	P. kindae	Chr17:8942720	34449	34474	38168	0
	204	P. kindae	Chr17:28054195	34449	34474	38168	1
	205	P. kindae	Chr17:48053364	34449	34474	38168	1
	206	P. kindae	Chr17:66935514	34449	34474	38168	0
	207	P. kindae	Chr17:77333135	34449	34474	38168	1	yes
	208	P. kindae	Chr17:85953471	34449	34474	38168	0
	209	P. kindae	Chr18:19154361	34449	34474	38168	1
	210	P. kindae	Chr18:35574029	34449	34474	38168	0
	211	P. kindae	Chr18:50075831	34449	34474	38168	1
	212	P. kindae	Chr19:96055	34449	34474	38168	0
	213	P. kindae	Chr19:2954909	34449	34474	38168	1
	214	P. kindae	Chr19:3913661	34449	34474	38168	0
	215	P. kindae	Chr19:6497403	34449	34474	38168	1
	216	P. kindae	Chr19:8218543	34449	34474	38168	0
	217	P. kindae	Chr19:21060382	34449	34474	38168	0	yes
	218	P. kindae	Chr19:21707154	34449	34474	38168	0	yes
	219	P. kindae	Chr19:22366882	34449	34474	38168	1
	220	P. kindae	Chr19:25109564	34449	34474	38168	0
	221	P. kindae	Chr19:25402937	34449	34474	38168	0
	222	P. kindae	Chr19:28736420	34449	34474	38168	1
	223	P. kindae	Chr19:30894412	34449	34474	38168	1
	224	P. kindae	Chr19:32207768	34449	34474	38168	1	has NPI
	225	P. kindae	Chr19:38017909	34449	34474	38168	0	yes
	226	P. kindae	Chr19:53452441	34449	34474	38168	1
	227	P. kindae	Chr20:3715426	34449	34474	38168	1	has NPI
	228	P. kindae	Chr20:17950692	34449	34474	38168	1
	229	P. kindae	Chr20:18524179	34449	34474	38168	1
	230	P. kindae	Chr20:23596849	34449	34474	38168	1
	231	P. kindae	Chr20:24021565	34449	34474	38168	1
	232	P. kindae	Chr20:25237568	34449	34474	38168	1
	233	P. kindae	Chr20:30372157	34449	34474	38168	0
	234	P. kindae	Chr20:52372477	34449	34474	38168	1
	235	P. kindae	Chr20:56824585	34449	34474	38168	0
	236	P. kindae	Chr20:71475255	34449	34474	38168	0

## Sheet: Table S4
			A	B	C	D	E	F	G (D- F)
		Papio	species-specific	shared in	post-filter	# retained	"new"	Shared in	High	Z	One-tailed
		Species	Jordan et al 2018	T. gelada	number	from B.	calls	Panu_2.0	Confidence	score	P-value
		P. anubis	4645	34	12	12	0	5	7	-1.02144	0.1536
		P. hamadryas	8060	101	91	82	7	9	73	0.609571	0.2711
		P. papio	10873	68	63	50	13	5	45	-0.0823744	0.4673
		P. cynocephalus	2794	26	25	18	7	2	16	-0.799032	0.2121
		P. ursinus	9545	57	42	37	5	4	33	-0.378922	0.3527
		P. kindae	12891	236	187	139	48	23	116	1.6722	0.0472*
