# Supplementary material for: Alu insertion polymorphisms shared by Papio baboons and Theropithecus gelada reveal an intertwined common ancestry
Source: Mob DNA. 2019 Nov 26;10:46. doi: 10.1186/s13100-019-0187-y (PMC6880559; doi:10.1186/s13100-019-0187-y)
Supplement: Supplementary file 2 — Additional file 2. An Excel file with worksheets for DNA samples, oligonucleotide PCR primers, genomic coordinates, genotype data for the PCR experiments, allele frequency and RepeatMasker output. (XLSX 89kb) [file 13100_2019_187_MOESM2_ESM.xlsx]

## Sheet: DNA panel and PCR plate
	#	Species	Common Name	Origin	ID	Animal
	1	TLE	negative control			ID
	2	Homo sapiens	Human	ATCC	HeLa CCL-2
	3	Papio anubis	Reference Olive Baboon	Jeff Rogers	27861	27861
	4	Papio anubis	Olive baboon	Jeff Rogers	L142	L142
	5	Papio anubis	Olive baboon	Jeff Rogers	LIV5	LIV5
	6	Papio hamadryas	Ethiopian-wild hamadryas baboon	Jeff Rogers	97124	97124
	7	Papio papio	Guinea baboon	Jeff Rogers	28547	28547
	8	Papio papio	Guinea baboon	Jeff Rogers	30388	30388
	9	Papio cynocephalus	Yellow baboon	Jeff Rogers	16066	3130
	10	Papio cynocephalus	Yellow baboon	Jeff Rogers	16098	5026
	11	Papio ursinus	Chacma baboon	Jeff Rogers	28697	28697
	12	Papio ursinus	Chacma baboon	Jeff Rogers	28755	28755
	13	Papio kindae	Kinda baboon	Jeff Rogers	34474	BZ11050
	14	Papio kindae	Kinda baboon	Jeff Rogers	34472	BZ11047
	15	Theropithecus gelada	Gelada monkey	SDFZ	KB10538	KB10538
	16	Macaca mulatta	Rhesus Macaque	Coriell	NG07109	NG07109
		1	2
	A	TLE	HeLa
	B	27861: Ref Olive	L142 P. anubis
	C	LIV5 P. anubis	97124 P. hamadryas
	D	28547 P. papio	30388 P. papio
	E	16066 P. cynocephalus	16098 P. cynocephalus
	F	28697 P. ursinus	28755 P. ursinus
	G	34474 P. kindae	34472 P. kindae
	H	KB 10538 T. gelada	NG07109 Rhesus

## Sheet: Genotypes
Species	Common Name	Origin	ID	Sample	Gelada-3	Gelada-3	Gelada-4	Gelada-4	Gelada-5	Gelada-5	Gelada-7	Gelada-7	Gelada-9	Gelada-9	Gelada-10	Gelada-10	Gelada-11	Gelada-11	Gelada-12	Gelada-12	Gelada-14	Gelada-14	Gelada-16	Gelada-16	Gelada-17	Gelada-17	Gelada-21	Gelada-21	Gelada-22	Gelada-22	Gelada-23	Gelada-23	Gelada-24	Gelada-24	Gelada-25	Gelada-25	Gelada-26	Gelada-26	Gelada-28	Gelada-28	Gelada-29	Gelada-29	Gelada-30	Gelada-30	Gelada-31	Gelada-31	Gelada-32	Gelada-32	Gelada-33
Homo sapiens	Human	ATCC	HeLa CCL-2		0	0	0	0	-9	-9	-9	-9	-9	-9	0	0	0	0	0	0	0	0	-9	-9	0	0	0	0	0	0	0	0	0	0	-9	-9	-9	-9	0	0	-9	-9	0	0	-9	-9	-9	-9	0
Papio anubis	Reference Olive Baboon	Jeff Rogers	27861	27861	0	0	0	0	0	0	0	0	0	0	1	1	0	0	0	0	0	0	0	0	0	0	1	1	1	1	0	0	1	1	0	0	0	0	1	0	0	0	0	0	1	1	0	0	0
Papio anubis	Olive baboon	Jeff Rogers	L142	L142	0	0	0	0	-9	-9	0	0	0	0	1	0	1	0	0	0	0	0	0	0	0	0	1	1	1	1	0	0	1	0	0	0	1	0	0	0	0	0	0	0	1	1	0	0	0
Papio anubis	Olive baboon	Jeff Rogers	LIV5	LIV5	0	0	0	0	0	0	0	0	0	0	1	1	0	0	0	0	0	0	0	0	0	0	1	1	1	1	0	0	1	1	0	0	0	0	0	0	0	0	0	0	1	1	0	0	0
Papio hamadryas	Ethiopian-wild hamadryas baboon	Jeff Rogers	97124	97124	0	0	1	1	0	0	0	0	0	0	0	0	1	1	1	0	1	1	0	0	1	1	1	1	1	1	0	0	0	0	0	0	0	0	0	0	1	1	0	0	1	1	0	0	0
Papio papio	Guinea baboon	Jeff Rogers	28547	28547	0	0	0	0	0	0	0	0	0	0	1	1	1	0	0	0	0	0	0	0	0	0	1	1	1	1	0	0	0	0	0	0	0	0	1	1	0	0	0	0	1	1	0	0	0
Papio papio	Guinea baboon	Jeff Rogers	30388	30388	0	0	0	0	0	0	0	0	0	0	1	1	0	0	0	0	0	0	0	0	0	0	1	1	1	1	0	0	0	0	0	0	0	0	1	1	0	0	0	0	1	1	0	0	0
Papio cynocephalus	Yellow baboon	Jeff Rogers	16066	3130	0	0	0	0	-9	-9	0	0	0	0	0	0	1	0	0	0	0	0	0	0	1	0	1	1	1	1	1	1	1	0	0	0	0	0	0	0	0	0	0	0	1	1	0	0	0
Papio cynocephalus	Yellow baboon	Jeff Rogers	16098	5026	1	1	0	0	-9	-9	0	0	0	0	0	0	0	0	0	0	0	0	0	0	0	0	1	1	1	1	1	1	0	0	0	0	1	0	0	0	0	0	0	0	1	1	0	0	0
Papio ursinus	Chacma baboon	Jeff Rogers	28697	28697	1	0	0	0	1	1	0	0	0	0	0	0	1	0	0	0	0	0	0	0	0	0	0	0	1	1	0	0	0	0	0	0	0	0	0	0	0	0	0	0	1	1	0	0	0
Papio ursinus	Chacma baboon	Jeff Rogers	28755	28755	0	0	0	0	1	1	0	0	0	0	0	0	0	0	0	0	0	0	0	0	0	0	0	0	1	1	0	0	0	0	0	0	0	0	0	0	0	0	0	0	1	1	0	0	0
Papio kindae	Kinda baboon	Jeff Rogers	34474	BZ11050	1	1	0	0	0	0	0	0	0	0	0	0	1	0	1	0	0	0	0	0	0	0	1	1	1	1	0	0	0	0	0	0	1	1	0	0	0	0	0	0	1	1	1	1	0
Papio kindae	Kinda baboon	Jeff Rogers	34472	BZ11047	1	1	0	0	-9	-9	0	0	0	0	0	0	0	0	0	0	0	0	0	0	0	0	1	1	1	1	0	0	0	0	0	0	1	0	0	0	0	0	0	0	1	1	0	0	0
Theropithecus gelada	Gelada monkey	SDFZ	KB10538	KB10538	1	1	0	0	1	1	0	0	1	1	1	1	1	0	1	0	1	1	0	0	1	1	1	1	1	1	1	1	1	1	1	1	1	1	1	1	1	1	0	0	1	1	1	1	0
Macaca mulatta	Rhesus Macaque	Coriell	NG07109	NG07109	0	0	0	0	0	0	0	0	0	0	0	0	0	0	0	0	0	0	-9	-9	0	0	0	0	0	0	0	0	0	0	0	0	0	0	0	0	0	0	0	0	0	0	0	0	0
[truncated: 300 more columns]

## Sheet: PCR primers & locations
	Ascertained		Genotype	Alu								hg19 PCR	Panu_2.0		Papio Alu	perc		Derived		Polymorphic among Papio
	from	#	Label	Locus ID	Forward Primer Name	Forward Primer Sequence 5' to 3'	Reverse Primer Name	Reverse Primer Sequence 5' to 3'	Filled (bp)	Empty (bp)	Panu_2.0 Coordinates	Coordinates	Alu	#	Subfamily	div.	Cluster	from	Notes	and present in a gelada
1	T. gelada: 38168	1	Gelada-3	Gelada-3	gelada3_chr1:107004596-F	AAAGAGTAGTTGGCCCCTTGA	gelada3_chr1:107004822-R	CCGCAAGACAAAAGGAGAAC	527*	227	chr1:107004596-107004822	chr1:106695801-106696028	no	1	incomplete	n/a	n/a	n/a	poly Papio, KB, absent others	yes
2	T. gelada: 38168	2	Gelada-4	Gelada-4	gelada4_chr1:131055659-F	AACTTCCTTGAGGCCTCTCC	gelada4_chr1:131055862-R	CCCTGGTCCCCTTCATATCT	504*	204	chr1:131055659+131055862	chr1:157135929-157136133	no	2	incomplete	n/a	n/a	n/a	poly Papio, absent others	no
3	T. gelada: 38168	3	Gelada-5	Gelada-5	gelada5_chr1:132329331-F	CATTTTTGCTTAATACTCCTTGATGA	gelada5_chr1:132329563-Ra	TGCCATCTAAtCTGTTTCTGACA	533*	233	chr1:132329331-132329563	chr1:158445519-158445742	no	3	incomplete	n/a	n/a	n/a	poly Papio, KB, absent others	yes
4	T. gelada: 38168	4	Gelada-7	Gelada-7	gelada7_chr2:10763215-F	AAGCCTTAAAGCACAACATCG	gelada7_chr2:10763444-R	TATTGCTGCCAGTGGGCTTA	530*	230	chr2:10763215+10763444	chr3:86784339-86784564	no	4	incomplete	n/a	n/a	n/a	absent all thus far	no
5	T. gelada: 38168	5	Gelada-9	Gelada-9	gelada9_chr2:140997955-F	TGATTCCTCACAAACCAGCTT	gelada9_chr2:140998155-R	TGAAAAGGTGTTACATATTATCTTGGA	501*	201	chr2:140997955+140998155	chr3:144785781-144785981	no	5	incomplete	n/a	n/a	n/a	only in KB, absent in Papio and others	no
6	T. gelada: 38168	6	Gelada-10	Gelada-10	gelada10_chr2:174759686-F	CTCTGGCCCCCTAAGTTTTG	gelada10_chr2:174760226-R	ACTTTGGGTTGCATGCTCTC	541	221	chr2:174759686-174760226	chr3:34582683-34582903	yes	6	AluMacYa3	2.1	1	AluMacYa3	poly Papio, KB, absent others	yes
7	T. gelada: 38168	7	Gelada-11	Gelada-11	gelada11_chr3:27504326-F	CTGAGAATTTTTACCTAAACGAAAGA	gelada11_chr3:27504625-R	TGTAGCTTTCTAGAACTTTGTGCAT	600*	300	chr3:27504326+27504625	chr21:20600136-20600431	no	7	incomplete	n/a	n/a	n/a	poly Papio, KB, absent others	yes
8	T. gelada: 38168	8	Gelada-12	Gelada-12	gelada12_chr3:30193614-F	CAAAGATGTTGCAGACCAGTG	gelada12_chr3:30193781-R	TGGTCAAGAAAGATGCCAGA	468*	168	chr3:30193614+30193781	chr21:17892368-17892535	no	8	incomplete	n/a	n/a	n/a	poly Papio, KB, absent others	yes
9	T. gelada: 38168	9	Gelada-14	Gelada-14	gelada14_chr3:58222672-F	AAGGAGAGGTGGGTGTAGCTT	gelada14_chr3:58222869-R	AGCACAGCTTTGCAACTGAC	498*	198	chr3:58222672-58222869	chr7:53163890-53164088	no	9	incomplete	n/a	n/a	n/a	poly Papio, KB, absent others	yes
10	T. gelada: 38168	10	Gelada-16	Gelada-16	gelada16_chr3:63935451-F	CCACAATGCGTAAAATGTGC	gelada16_chr3:63935670-R	GAACAGGGCAAAACCTCGTA	520*	220	chr3:63935451+63935670	chr7:47456170-47456399	no	10	incomplete	n/a	n/a	n/a	absent all thus far	no
11	T. gelada: 38168	11	Gelada-17	Gelada-17	gelada17_chr3:119189256-F	CTGGAGATAGCAGGCAAAGG	gelada17_chr3:119189503-R	TGTGGTTTCCTTGTACAGTATTGC	547 *	247	chr3:119189256+119189503	chr7:82435439-82435686	no	11	incomplete	n/a	n/a	n/a	poly Papio; KB; absent others	yes
12	T. gelada: 38168	12	Gelada-21	Gelada-21	gelada21_chr3:170899134-F	GGCTTTGCTTGTTCTGGACT	gelada21_chr3:170899663-R	CTTCCCTCCTGAAGCTCTGA	529	228	chr3:170899134-170899663	chr7:148949991-148950197	yes	12	subfamily77	0.3	8	AluYRa4	poly Papio; KB; absent others	yes
13	T. gelada: 38168	13	Gelada-22	Gelada-22	gelada22_chr4:24408223-F	CCATTTCTGTGCCCTAAAGC	gelada22_chr4:24408787-R	AGCTACATGGGACACCCACT	564	263	chr4:24408223+24408787	chr6:24476810-24477054	yes	13	AluMacYa3	4.2	1 central	AluMacYa3	Fixed in all except Mangaby and Rhesus	no
14	T. gelada: 38168	14	Gelada-23	Gelada-23	gelada23_chr4:48491501-F	GGCATGCCATAACCTTGAAA	gelada23_chr4:48491739-R	GAATTGGTTTCGGGGATAAAA	538 *	238	chr4:48491501+48491739	chr6:49241436-49241675	no	14	incomplete	n/a	n/a	n/a	poly Papio, KB, T, L; absent M, M, R	yes
15	T. gelada: 38168	15	Gelada-24	Gelada-24	gelada24_chr4:57687064-F	TGGGAGTGTAAGCTCAACCA	gelada24_chr4:57687445-R	TTTTCTTTTAGGGCACATTTGAA	500 *	200 *	chr4:57687064+57687445	chr6:62518068-62518267	yes	15	N's in Panu_2.0	n/a	n/a	n/a	poly Papio, KB, T, L; absent M, M, R	yes
16	T. gelada: 38168	16	Gelada-25	Gelada-25	gelada25_chr4:61986337-F	TCAAGAAGTTTGCCAATATGC	gelada25_chr4:61986537-R	TCATTGAATATTTCAAAAGTGAGAA	501*	201	chr4:61986337+61986537	chr6:66769227-66769428	no	16	incomplete	n/a	n/a	n/a	KB, L, absent in Papio and others	no
17	T. gelada: 38168	17	Gelada-26	Gelada-26	gelada26_chr4:62044686-F	AAAATCTGCCATATGAAATAAGAACA	gelada26_chr4:62044966-R	TTTCATAAGCCAATAAACACCTTT	581*	281	chr4:62044686-62044966	chr6:66857877-66858155	no	17	incomplete	n/a	n/a	n/a	poly Papio, KB, TD, L; absent Mandril, R	yes
18	T. gelada: 38168	18	Gelada-28	Gelada-28	gelada28_chr5:17262437-F	GAAAGTCTTTGATGTCCATTGC	gelada28_chr5:17262644-R	CACTCCATTCTGGGACTTGC	508*	208	chr5:17262437+17262644	chr4:22479789-22479995	no	18	incomplete	n/a	n/a	n/a	poly Papio, KB, absent others	yes
19	T. gelada: 38168	19	Gelada-29	Gelada-29	gelada29_chr5:30755061-F	GGATGAGGACCTCTCACTATTTC	gelada29_chr5:30755291-R	AGTCCAGGCCCATTTCTTTT	530 *	230	chr5:30755061+30755291	chr4:35940126-35940357	no	19	incomplete	n/a	n/a	n/a	poly Papio; KB; absent others	yes
20	T. gelada: 38168	20	Gelada-30	Gelada-30	gelada30_chr5:66801860-F	TGTCTGTTGGTTCTGGTCCTT	gelada30_chr5:66802033-R	CAAAACCTCCTTTGGGCTAA	474*	174	chr5:66801860+66802033	chr4:62515327-62515502	no	20	incomplete	n/a	n/a	n/a	absent all thus far	no
21	T. gelada: 38168	21	Gelada-31	Gelada-31	gelada31_chr5:68352802-F	TTAACATGCCAACGGTCAGA	gelada31_chr5:68353339-R	CCTTTTAACAGGGCATTCTCA	537	240	chr5:68352802+68353339	chr4:61010410-61010619	yes	21	subfamily64	3.2	1	AluMacYa3	fixed Papio, KB; absent T, L, M, M, R	no
22	T. gelada: 38168	22	Gelada-32	Gelada-32	gelada32_chr5:71507242-F	CCCCCTCCCAAATGAATTAC	gelada32_chr5:71507477-R	CATGGCCAAAAGGGTACTTG	535 *	235	chr5:71507242+71507477	chr4:57889876-57890112	no	22	incomplete	n/a	n/a	n/a	poly Papio; KB; absent others	yes
23	T. gelada: 38168	23	Gelada-33	Gelada-33	gelada33_chr5:82642697-F	GCTCACATGCCCTATTTACAA	gelada33_chr5:82642934-R	GCTCTCAGCATGGAGAACCT	526*	226	chr5:110955165+110955390	chr4:121211089-121211412	no	23	incomplete	n/a	n/a	n/a	absent all thus far	no
24	T. gelada: 38168	24	Gelada-34	Gelada-34	gelada34_chr5:110955165-F	AACCAATCTCTTTTCTCTCCCTTT	gelada34_chr5:110955390-R	TTGAATGGAAATACAATAAGTTGAAAA	525 *	225	chr5:110955165+110955390	chr4:121211089-121211412	no	24	incomplete	n/a	n/a	n/a	poly Papio; KB; absent others	yes
25	T. gelada: 38168	25	Gelada-35	Gelada-35	gelada35_chr5:149471248-F	CCCTAATGCACTTGGAAATCA	gelada35_chr5:149471430-R	TTGCCTCTTCTGCTTCAACA	482 *	182	chr5:149471248+149471430	chr4:160935645-160935827	no	25	incomplete	n/a	n/a	n/a	poly Papio; KB; absent others	yes
26	T. gelada: 38168	26	Gelada-36	Gelada-36	gelada36_chr5:173544778-F	ACATGTGGTGGTGGTACACG	gelada36_chr5:173544999-R	GGGAAGAAGAGGCAGAGGAG	521 *	221	chr5:173544778+173544999	chr4:185344383-185344601	no	26	incomplete	n/a	n/a	n/a	poly Papio; KB; absent others	yes
27	T. gelada: 38168	27	Gelada-37	Gelada-37	gelada37_chr6:74523744-F	GTGGTTGCTAAGTCCCTCGT	gelada37_chr6:74523985-R	TTGTGGCAAATGTTGTCTGA	541 *	241	chr6:74523744+74523985	chr5:79794178-79794400	no	27	incomplete	n/a	n/a	n/a	poly Papio; KB; absent others	yes
28	T. gelada: 38168	28	Gelada-38	Gelada-38	gelada38_chr6:87445262-F	TTCCCTTTGTGGCTTTGAAC	gelada38_chr6:87445510-R	TGCAGCTCTGACAAAAGTGG	549*	249	chr6:87445262+87445510	chr5:92764604-92764850	no	28	incomplete	n/a	n/a	n/a	absent all thus far	no
29	T. gelada: 38168	29	Gelada-39	Gelada-39	gelada39_chr6:114905897-F	TCCTCTCCAAATAACTTATGCAG	gelada39_chr6:114906281-R	TGTCAGTATCTGGGTCTGGAA	685*	385	chr6:114905897+114906281	chr5:120337973-120338363	no	29	incomplete	n/a	n/a	n/a	absent all thus far	no
30	T. gelada: 38168	30	Gelada-41	Gelada-41	gelada41_chr7:13541390-F	CCACCTAGCTTGTTTTGATGGT	gelada41_chr7:13541619-R	TGAGGAGTGGACACAAAAGAGA	529 *	229	chr7:13541390+13541619	chr15:39318941-39319169	no	30	incomplete	n/a	n/a	n/a	poly Papio, KB, T, L; absent M, M, R	yes
31	T. gelada: 38168	31	Gelada-42	Gelada-42	gelada42_chr7:56486341-Fa	CAGGCAGAAAAACTTCATGACa	gelada42_chr7:56486574-R	AACATTTGCCTTGCCTGTAAGT	534*	234	chr7:56486341-56486574	chr15:82302426-82302658	no	31	incomplete	n/a	n/a	n/a	absent in Papio, KB	no
32	T. gelada: 38168	32	Gelada-43	Gelada-43	gelada43_chr7:78126939-F	TCAGAATTGGCATAGATTCTGGT	gelada43_chr7:78127494-R	TCAGCCATTCTGTGATGTATTG	548*	248	chr7:78126939+78127494	chr14:21966675-21966918	no	32	incomplete	n/a	n/a	n/a	fixed Papio, KB; absent T, L, M, M, R	no
33	T. gelada: 38168	33	Gelada-44	Gelada-44	gelada44_chr7:145536553-F	AGGCCCCAAATAAGTACTTCCA	gelada44_chr7:145536747-R	TACAATCTCAAGGTGTGTGCAG	494 *	194	chr7:145536553+145536747	chr14:89897033-89897226	no	33	incomplete	n/a	n/a	n/a	poly Papio; KB; absent others	yes
34	T. gelada: 38168	34	Gelada-48	Gelada-48	gelada48_chr8:10821220-F	TCCTATTTCCTGCAAGTGCATA	gelada48_chr8:10821430-R	ACATGCTGAAGATGAAGCTCTG	510 *	210	chr8:10821220+10821430	chr8:12844054-12844263	no	34	incomplete	n/a	n/a	n/a	poly Papio, KB, T, L; M absent M, R	yes
35	T. gelada: 38168	35	Gelada-49	Gelada-49	gelada49_chr8:23654405-F	TCCGAAGAAAATGAGAGAAAGG	gelada49_chr8:23654595-R	GTCAAACCCCTTCCTTAAATCC	490 *	190	chr8:23654405+23654595	chr8:25479122-25479316	no	35	incomplete	n/a	n/a	n/a	poly Papio; KB; T; absent L, M, M, R	yes
36	T. gelada: 38168	36	Gelada-50	Gelada-50	gelada50_chr8:49047757-F	TTCTCCCATCTCTGTCATTGTG	gelada50_chr8:49047951-R	CTTTCTTGGGaGATAATTGGTT	495*	195	chr8:49047757-49047951	chr8:53926247-53926441	no	36	incomplete	n/a	n/a	n/a	poly Papio; KB; absent others	yes
37	T. gelada: 38168	37	Gelada-51	Gelada-51	gelada51_chr9:440030-F	ACCTGGTGAGTAGGCAAACAGT	gelada51_chr9:440231-R	TTTCCAGAACAGAAACCTCTGA	502*	202	chr9:440030+440231	chr10:560952-561015	no	37	incomplete	n/a	n/a	n/a	absent all thus far	no
38	T. gelada: 38168	38	Gelada-52	Gelada-52	gelada52_chr9:14326574-F	CCTTGGGTGAATCTCTCTCTTG	gelada52_chr9:14326816-R	CTTCCCAGAGTAAAAGCACTGG	543*	243	chr9:14326574-14326816	chr10:14179664-14179912	no	38	incomplete	n/a	n/a	n/a	absent all thus far	no
39	T. gelada: 38168	39	Gelada-54	Gelada-54	gelada54_chr9:46165406-F	AAAGACAAGGGGAAAAGAATCA	gelada54_chr9:46165632-R	TCACTTCCACAAGCATTGTACC	526 *	226	chr9:46165406+46165632	chr10:85641064-85641290	no	39	incomplete	n/a	n/a	n/a	poly Papio; KB; absent others	yes
40	T. gelada: 38168	40	Gelada-55	Gelada-55	gelada55_chr9:55492928-F	TGGCCTATAGAGAGATGCTTCA	gelada55_chr9:55493443-R	GATTGAACCATAAAAGGCATGT	515	219	chr9:55492928+55493443	chr10:76004782-76004988	yes	40	AluMacYa3	2.1	1 central	AluMacYa3	Fixed in all except Rhesus	no
41	T. gelada: 38168	41	Gelada-56	Gelada-56	gelada56_chr9:82396559-F	TGAGAATGTACAAGCTCCTATGACA	gelada56_chr9:82396789-R	AGAAAATGTTTGCGTAGCTGAAG	531*	231	chr9:82396559+82396789	chr10:92148380-92148610	no	41	incomplete	n/a	n/a	n/a	absent all thus far	no
42	T. gelada: 38168	42	Gelada-57	Gelada-57	gelada57_chr9:113455544-F	TTCAAAGTTTGCTAAAACACATCC	gelada57_chr9:113455756-R	TTGATGTTAATAAGTATAGAGCCACCA	512 *	212	chr9:113455544+113455756	chr10:123635813-123636020	no	42	incomplete	n/a	n/a	n/a	poly Papio, KB, T, L; absent M, M, R	yes
43	T. gelada: 38168	43	Gelada-58	Gelada-58	gelada58_chr10:30626612-F	CAAAGGCTCAAATGAGAAGGTT	gelada58_chr10:30627160-R	GGCATTGCTTTCTTGATTGACT	548	250	chr10:30626612+30627160	chr20:32192883-32193114	yes	43	subfamily64	2.8	1	AluMacYa3	poly Papio; KB; absent others	yes
44	T. gelada: 38168	44	Gelada-60	Gelada-60	gelada60_chr11:10292466-F	CTAACCAAAACCCATGAACACA	gelada60_chr11:10292682-R	AACATTGTTTAGAAGAGCAAAGGT	516 *	216	chr11:10292466+10292682	chr12:10761502-10761718	no	44	incomplete	n/a	n/a	n/a	poly Papio; KB, M; absent TD, L, M, R	yes
45	T. gelada: 38168	45	Gelada-61	Gelada-61	gelada61_chr11:56094650-F	GGAAAATTGTAAAAATTGCTTGG	gelada61_chr11:56094825-R	AATCGCATTAAATTTCACTGTCC	476*	176	chr11:56094650-56094825	chr12:60867269-60867446	no	45	incomplete	n/a	n/a	n/a	absent all thus far	no
46	T. gelada: 38168	46	Gelada-62	Gelada-62	gelada62_chr11:61792034-F	AATTCTTTGGTTCGCATTTCC	gelada62_chr11:61792283-R	TTGCCTTAGGGATAATATGCAA	550*	250	chr11:61792034+61792283	chr12:66768553-66768801	no	46	incomplete	n/a	n/a	n/a	absent all thus far	no
47	T. gelada: 38168	47	Gelada-63	Gelada-63	gelada63_chr11:103473622-F	TCTTCTGAGAGTGGTGGTGTGT	gelada63_chr11:103473808-R	CTGCTGTCATCACTTTCTGGTT	487*	187	chr11:103473622+103473808	chr12:104637325-104637511	no	47	incomplete	n/a	n/a	n/a	poly Papio, KB, T; absent L, M, M, R	yes
48	T. gelada: 38168	48	Gelada-64	Gelada-64	gelada64_chr11:103502270-Fa	GTCTCgGGAGTCTGGGATTTTG	gelada64_chr11:103502777-Ra	GATCAACCACCCTCACCATcAG	507	210	chr11:103502270-103502777	chr12:104668084-104668610	yes	48	subfamily55	3.9	1	AluMacYa3	poly Papio; KB; absent others	yes
49	T. gelada: 38168	49	Gelada-66	Gelada-66	gelada66_chr12:2733153-F	TTGTGGTAAGCTATACTGGTTGC	gelada66_chr12:2733372-R	TGCATTTGCTAGATTCCACAGT	519 *	219	chr12:2733153+2733372	chr2:141199022-141199241	no	49	incomplete	n/a	n/a	n/a	poly Papio; KB; absent others	yes
50	T. gelada: 38168	50	Gelada-69	Gelada-69	gelada69_chr13:87029451-F	TTCCCAGGAATGACTCTGGTAT	gelada69_chr13:87029684-R	AGTCTGGGGACTGTATGCATCT	534*	234	chr13:87029451-87029684	chr2:89939791-89939881	no	50	incomplete	n/a	n/a	n/a	absent all thus far	no
51	T. gelada: 38168	51	Gelada-70	Gelada-70	gelada70_chr13:104847862-F	TCTGCTGGCATGCATATAAATC	gelada70_chr13:104848107-R	CCCCAGGTAAGGAAGAACATTAG	546*	246	chr13:104847862-104848107	multiple chains	no	51	incomplete	n/a	n/a	n/a	absent all thus far	no
52	T. gelada: 38168	52	Gelada-71	Gelada-71	gelada71_chr14:107953391-F	AATCCATCCTTCTCTTCCCTCT	gelada71_chr14:107953625-R	TCAACCAGCTAAAAGCACAGAA	534 *	234	chr14:107953391+107953625	chr11:118472950-118473185	no	52	incomplete	n/a	n/a	n/a	poly Papio; KB; absent others	yes
53	T. gelada: 38168	53	Gelada-72	Gelada-72	gelada72_chr15:62499937-F	CTCAAGGAGTAGGGCTGAAGAA	gelada72_chr15:62500472-Ra	TGAGCAAAGGTTACAGAAAACa	535	251	chr15:62499937-62500472	chr9:12452329-12452562	yes	53	AluMacYb2	1.5	n/a	n/a	poly Papio; KB; absent others	yes
54	T. gelada: 38168	54	Gelada-73	Gelada-73	gelada73_chr15:87638551-F	TTCTTCTGCTCATACAACATTCA	gelada73_chr15:87638785-R	GGGTCCAATCAATGTACATCCT	535*	235	chr15:87638551+87638785	chr9:83571586-83571820	no	54	incomplete	n/a	n/a	n/a	absent all thus far	no
55	T. gelada: 38168	55	Gelada-74	Gelada-74	gelada74_chr15:90736946-F	GGAATGACCCGGTTTAAAGTAG	gelada74_chr15:90737114-R	ATTTGGCCTATGCCTATTTTGC	469*	169	chr15:90736946+90737114	chr9:86709913-86710371	no	55	incomplete	n/a	n/a	n/a	absent all thus far	no
56	T. gelada: 38168	56	Gelada-75	Gelada-75	gelada75_chr15:91254145-F	TAGTCCCTCCAGTCTTCTCAGG	gelada75_chr15:91254391-R	GCTCCAAACACATAGTGGATCA	547*	247	chr15:91254145+91254391	chr9:87231950-87232195	no	56	incomplete	n/a	n/a	n/a	absent all thus far	no
57	T. gelada: 38168	57	Gelada-76	Gelada-76	gelada76_chr15:106607732-F	ATCTGTTGCTTAAAGGAATTGG	gelada76_chr15:106607936-R	TTTTATGGAGTTGATATGCCATT	505*	205	chr15:106607732+106607936	chr9:39087991-39088202	no	57	incomplete	n/a	n/a	n/a	poly Papio, KB, absent others	yes
58	T. gelada: 38168	58	Gelada-77	Gelada-77	gelada77_chr16:43747605-F	TAGTCAGCCCGGTCCTAATTC	gelada77_chr16:43748160-R	CTCTTCCCCAGAACATCTTAGC	556	241	chr16:43747605+43748160	chr17:35454125-35454361	yes	58	AluMacYa3	4.2	1 central	AluMacYa3	Fixed in all except Rhesus	no
59	T. gelada: 38168	59	Gelada-78	Gelada-78	gelada78_chr16:60837018-F	TGTAGAACACAAGATTTATGTGTATGG	gelada78_chr16:60837240-R	GTCACAGTTTTAAGTGGCCTGA	523*	223	chr16:60837018+60837240	chr17:67393605-67393825	no	59	incomplete	n/a	n/a	n/a	poly Papio; KB; absent others	yes
60	T. gelada: 38168	60	Gelada-79	Gelada-79	gelada79_chr17:689513-F	CAGTTCTGCCATAATTGAGAAGG	gelada79_chr17:689743-R	ACAGACACATGATCAGGACAGC	531*	231	chr17:689513-689743	chr13:21018453-21018683	no	60	incomplete	n/a	n/a	n/a	poly Papio; KB; absent others	yes
61	T. gelada: 38168	61	Gelada-80	Gelada-80	gelada80_chr17:7550812-F	TATTTTCAAGGGATCTGGGATG	gelada80_chr17:7551032-R	AAGGGGAAGGTAGGATACTTGC	521*	221	chr17:7550812-7551032	chr13:28878197-28878410	no	61	incomplete	n/a	n/a	n/a	poly Papio; KB; absent others	yes
62	T. gelada: 38168	62	Gelada-81	Gelada-81	gelada81_chr17:42787210-F	TGGCTTGTAATCTAGAAACATTAGC	gelada81_chr17:42787430-R	AGCTAGCTCCCTCTGCAGTCTA	532*	232	chr17:62686600+62686831	chr13:85815734-85815971	no	62	incomplete	n/a	n/a	n/a	poly Papio; KB; absent others	yes
63	T. gelada: 38168	63	Gelada-82	Gelada-82	gelada82_chr17:62686600-F	CCTCTGGCTTCAAATACTTCGT	gelada82_chr17:62686600-R	CAGTCGATAGATATCCAGGAATGA	531*	231	chr17:75803257+75803487	chr13:99123187-99123416	no	63	incomplete	n/a	n/a	n/a	poly Papio, -9 in KB	no
64	T. gelada: 38168	64	Gelada-83	Gelada-83	gelada83_chr17:75803257-F	TGAAGCAGATGCAATCTTTAGG	gelada83_chr17:75803487-R	ATAGCCTCCCTGCTTCTTCCT	520*	220	chr17:87534113+87534332	chr13:111159241-111159460	no	64	incomplete	n/a	n/a	n/a	poly Papio, KB, T, L; absent M, M, R	yes
65	T. gelada: 38168	65	Gelada-84	Gelada-84	gelada84_chr17:87534113-F	GGAGACCACCAATTACTTCACC	gelada84_chr17:87534332-R	AATTTGTGTGTGTTGCGTTTTC	519 *	219	chr17:87534113+87534332	chr13:111159241-111159460	no	65	incomplete	n/a	n/a	n/a	poly Papio; KB; absent others	yes
66	T. gelada: 38168	66	Gelada-85	Gelada-85	gelada85_chr18:11202906-Fa	TGATGGAGTAGCAGCTTTCTCg	gelada85_chr18:11203109-Ra	AGGGTTTTGATCTCTTTGACCt	503 *	203	chr18:11202906-11203109	chr18:2033608-2033811	no	66	incomplete	n/a	n/a	n/a	poly Papio, KB, T, L; absent M, M, R	yes
67	T. gelada: 38168	67	Gelada-86	Gelada-86	gelada86_chr18:22979758-Fa	ATGTTTGGTATGCATGTGGgTG	gelada86_chr18:22979946-Ra	TCTTCAGAgGGAGGACTTcTCA	488*	188	chr18:22979758-22979946	chr18:28566148-28566336	no	67	incomplete	n/a	n/a	n/a	poly Papio, KB, T, L; absent M, M, R	yes
68	T. gelada: 38168	68	Gelada-87	Gelada-87	gelada87_chr18:71501978-F	TTAACAGACGGAGATCCAGACC	gelada87_chr18:71502506-R	AGGACACCAGGTGAGGTTTATG	528	231	chr18:71501978+71502506	chr18:77329187-77329399	yes	68	subfamily70	3.2	AluY	AluY	poly Papio; KB; absent others	yes
69	T. gelada: 38168	69	Gelada-88	Gelada-88	gelada88_chr19:5648639-F	AGGAGTTGAGGGAAAGGGTATC	gelada88_chr19:5648882-R	CTCGTATCCTCCCCACCTCT	544*	244	chr19:5648639+5648882	chr19:5867960-5868207	no	69	incomplete	n/a	n/a	n/a	poly Papio; KB, T; absent others	yes
70	T. gelada: 38168	70	Gelada-90	Gelada-90	gelada90_chr19:19324068-Fa	CACATATgGGTGGAGCAGAGAG	gelada90_chr19:19324596-R	CCCTGGAGCATAGATCAAATTC	528	230	chr19:19324068-19324596	chr16:35095850-35096064	yes	70	AluMacYa3	0.7	1 central	AluMacYa3	poly Papio; KB, M; absent TD, L, M, R	yes
71	T. gelada: 38168	71	Gelada-96	Gelada-96	gelada96_chr20:3026104-F	TAGAAAAGGCGCTCTCTCAAAG	gelada96_chr20:3026659-R	CTAGTCCCAGTGGCTATGGAAG	555	255	chr20:3026104-3026659	deleted	yes	71	subfamily33	0.3	1	AluMacYa3	fixed Papio / T /L; absent M, M ,R	no
72	T. gelada: 38168	72	Gelada-97	Gelada-97	gelada97_chr1:30701070-F	AGTGGAACTTGGGATTCAGTGT	gelada97_chr1:30701279-R	GAACTTTGGGTAAATGCAAAAA	509 *	209	chr1:30701070+30701279	chr1:28794136-28794346	no	72	incomplete	n/a	n/a	n/a	poly Papio; KB; absent others	yes
73	T. gelada: 38168	73	Gelada-98	Gelada-98	gelada98_chr1:64319740-F	CCACCTGCTGACTTTCTAGGAT	gelada98_chr1:64319965-Ra	TCATACCCTCCAGCTAGAtGAC	525 *	225	chr1:64319740-64319965	deleted	no	73	incomplete	n/a	n/a	n/a	poly Papio; KB; L; absent TD, M, M, R	yes
74	T. gelada: 38168	74	Gelada-99	Gelada-99	gelada99_chr1:100399774-F	AATCCTGCCAGAAGAAAATACAA	gelada99_chr1:100400010-R	TGAAATGAAAACATGGTGGATG	537*	237	chr1:100399774+100400010	chr1:99790469-99790705	no	74	incomplete	n/a	n/a	n/a	absent all thus far	no
75	T. gelada: 38168	75	Gelada-100	Gelada-100	gelada100_chr1:127123670-F	TTCCTTGGTCACTCTTACAGCA	gelada100_chr1:127123910-R	GTGTCAACCACAACTCACCTGT	541*	241	chr1:127123670+127123910	chr1:153278336-153278576	no	75	incomplete	n/a	n/a	n/a	poly Papio, KB, M, M, absent T, L, R	yes
76	T. gelada: 38168	76	Gelada-101	Gelada-101	gelada101_chr1:134714374-F	GTGTGCCTTTGAGGTTTCTCTT	gelada101_chr1:134714920-R	TGACTCTTTTGAGCCTGTTTCA	547	227	chr1:134714374+134714920	chr1:160747517-160747731	yes	76	subfamily48	3.2	6	AluMacYa3	poly Papio, absent others	no
77	T. gelada: 38168	77	Gelada-102	Gelada-102	gelada102_chr1:134793314-Fa	ACGAAAAAGGAACGAAAgGGTT	gelada102_chr1:134793559-R	ACTAGATGGCAGGGCACTTAGA	546*	246	chr1:134793314-134793559	chr1:160837010-160837270	no	77	incomplete	n/a	n/a	n/a	poly Papio, absent others	no
78	T. gelada: 38168	78	Gelada-104	Gelada-104	gelada104_chr1:197837437-F	TTAGTGTAGTCACAGCCCGTGT	gelada104_chr1:197837635-R	GATGCAGAGCCATAAAAGATGG	499*	199	chr1:197837437-197837635	chr1:175188090-175188288	no	78	incomplete	n/a	n/a	n/a	poly Papio, absent others	no
79	T. gelada: 38168	79	Gelada-106	Gelada-106	gelada106_chr3:3689040-F	ACCTATGGAACTCCGCAAATAA	gelada106_chr3:3689275-R	CATACCTTGAGGCATTGTTGAC	536*	236	chr3:3689040+3689275	deleted	no	79	incomplete	n/a	n/a	n/a	poly Papio, KB, T, absent others	yes
80	T. gelada: 38168	80	Gelada-107	Gelada-107	gelada107_chr5:11493377-F	TGCATTTCTTCTCCAATGATTTC	gelada107_chr5:11493626-R	TCCCTTAAATCATGTGCTTTTACA	550	250	chr5:11493377+11493626	chr4:16739509-16739753	no	80	incomplete	n/a	n/a	n/a	poly Papio, KB, absent others	yes
81	T. gelada: 38168	81	Gelada-108	Gelada-108	gelada108_chr5:22468799-F	AAAAGGAACCACAAATGGACAC	gelada108_chr5:22469031-R	TCATCTTTTACGCTTGACAAGAAA	532 *	232	chr5:22468799+22469031	chr4:27707173-27707405	no	81	incomplete	n/a	n/a	n/a	poly Papio; KB; absent others	yes
82	T. gelada: 38168	82	Gelada-109	Gelada-109	gelada109_chr5:78536066-F	TCCACCTCCATGAATTTATCCT	gelada109_chr5:78536309-R	TAAACTGGGGTGTGTGTGGTAG	544*	244	chr5:78536066+78536309	chr4:87935212-87935463	no	82	incomplete	n/a	n/a	n/a	absent all thus far	no
83	T. gelada: 38168	83	Gelada-111	Gelada-111	gelada111_chr7:41530000-F	TTGAGGTGAAATGTATGCTAGAGG	gelada111_chr7:41530219-R	CCCTAATTCTAAATGGGGCATA	519 *	219	chr7:41530000+41530219	chr15:67448588-67448804	no	83	incomplete	n/a	n/a	n/a	poly Papio; KB; absent others	yes
84	T. gelada: 38168	84	Gelada-114	Gelada-114	gelada114_chr7:101996500-F	ATCCTGGAGTAATTTGGCCTCT	gelada114_chr7:101996748-R	AATTTTATGGCATCCCAGCAT	548 *	248	chr7:101996500+101996748	chr14:45837036-45837284	no	84	incomplete	n/a	n/a	n/a	poly Papio; KB; absent others	yes
85	T. gelada: 38168	85	Gelada-115	Gelada-115	gelada115_chr8:47091488-F	GGTAACATTCACATAGCCACGA	gelada115_chr8:47091733-R	TGACATCATAATGGCCAATGAC	546*	246	chr8:47091488-47091733	chr8:51982497-51982728	no	85	incomplete	n/a	n/a	n/a	absent in Papio, KB	no
86	T. gelada: 38168	86	Gelada-116	Gelada-116	gelada116_chr8:119368195-F	ACTTACAAAACCTGACATTCAAAA	gelada116_chr8:119368701-R	ACTCAAATGCCTTTATGGGTTT	507	203	chr8:119368195+119368701	chr8:125359350-125359552	yes	86	subfamily58	2.1	1	AluMacYa3	poly Papio; KB; absent others	yes
87	T. gelada: 38168	87	Gelada-117	Gelada-117	gelada117_chr8:120961447-Fa	TAGAGGCTTTCCCTCTcCACTG	gelada117_chr8:120961651-R	AGAATCTAAGGAAACCCCAAGC	504 *	204	chr8:120961447-120961651	chr8:126945785-126945989	no	87	incomplete	n/a	n/a	n/a	poly Papio; KB; absent others	yes
88	T. gelada: 38168	88	Gelada-119	Gelada-119	gelada119_chr10:38205297-F	CCAAACTCAGCACAAATAACCA	gelada119_chr10:38205533-R	CAGGAGACTTGGACATTTAGCA	536 *	236	chr10:38205297+38205533	chr20:5405784-5406024	no	88	incomplete	n/a	n/a	n/a	poly Papio; KB; absent others	yes
89	T. gelada: 38168	89	Gelada-121	Gelada-121	gelada121_chr11:20899496-F	AGGCGCCTTTAACAAGTCTCTT	gelada121_chr11:20899734-R	GACACTGGTTTTTGCATCTCAG	539*	239	chr11:20899496+20899734	chr12:21556796-21557034	no	89	incomplete	n/a	n/a	n/a	poly Papio; KB; absent others	yes
90	T. gelada: 38168	90	Gelada-122	Gelada-122	gelada122_chr11:88945022-F	TATTTGGACTGTTTCCCTTTCC	gelada122_chr11:88945257-R	TGGATCTGGAGATTTCTGGAAG	535 *	235	chr11:88945022+88945257	chr12:89971795-89972030	yes	90	not found in Panu_2.0	n/a	n/a	n/a	poly Papio, KB, T, L; absent M, M, R	yes
91	T. gelada: 38168	91	Gelada-124	Gelada-124	gelada124_chr17:12435391-F	ATCCTGATATTCAAGGGAGTGC	gelada124_chr17:12435598-R	GTAAAAAGAATGGCAAAGCACA	507 *	207	chr17:12435391+12435598	chr13:34091713-34091920	no	91	incomplete	n/a	n/a	n/a	poly Papio, KB, T, L; absent M, M, R	yes
92	T. gelada: 38168	92	Gelada-125	Gelada-125	gelada125_chr18:58017047-F	AAAAATGCACCCACTATGAAGC	gelada125_chr18:58017236 -R	GCCACACATTTCATTTGTGAAT	490*	190	chr18:58017047+58017236	chr18:63377178-63377367	no	92	incomplete	n/a	n/a	n/a	absent all thus far	no
93	T. gelada: 38168	93	Gelada-126	Gelada-126	gelada126_chr18:70523250-F	GCAAACGGAAAAATTACATTCTG	gelada126_chr18:70523455-R	TCTGGCTCTAAAATCCAAGATTATG	506*	206	chr18:70523250-70523455	chr18:76297013-76297216	no	93	incomplete	n/a	n/a	n/a	poly Papio, KB, absent M, M, R	yes
94	T. gelada: 38168	94	Gelada-127	Gelada-127	gelada127_chr19:4213212-Fa	AGATCCTGCTGTCCcTTTTCAG	gelada127_chr19:4213743-R	TGCAAACAAACTTCAGAAATGG	532	203	chr19:4213212-4213743	chr19:4413709-4413933	yes	94	AluMacYa3	2.5	1 central	AluMacYa3	fixed Papio, KB, absent others	no
95	T. gelada: 38168	95	Gelada-130	Gelada-130	gelada130_chr19:31593506-F	TCCTTTCTTCTTCAGCTCTGCT	gelada130_chr19:31593724-R	AACAGACTACTGGGCTCTCTGC	518 *	218	chr19:31593506+31593724	chr19:37710575-37710794	no	95	incomplete	n/a	n/a	n/a	poly Papio; KB; absent others	yes
96	T. gelada: 38168	96	Gelada-131	Gelada-131	gelada131_chr20:16974786-F	CTACACTGCTGTGAAGGCTCAA	gelada131_chr20:16974991-R	CAGCATTTTCTTTTTCCACTCC	506*	206	chr20:16974786+16974991	chr16:18794245-18794450	no	96	incomplete	n/a	n/a	n/a	absent all thus far	no
1	P. anubis WGS	97	Anu-17	AnuGel_17	AnuGel_17F_chr5_158052928	CCTATTTCATCGTCCTGAGTAGC	AnuGel_17R_chr5_158052928	ACTATCTGCAACACATCCACC	687*	387	chr5:147574864+147575250	chr4:158988623-158989006	no	97	incomplete	n/a	n/a	n/a
2	P. anubis WGS	98	Anu-12	AnuGel_12	AnuGel_12F_chr4_66040550	TTTCCCACTGTAGCTAGCAC	AnuGel_12R_chr4_66040550	TGCCACTATCTTTTGCTGAGC	609*	309	chr4:63767608+63767916	chr6:68641696-68642005	no	98	incomplete	n/a	n/a	n/a
3	P. anubis WGS	99	Anu-20	AnuGel_20	AnuGel_20F_chr6_121829104	GAAGAAGGTGCCTGTTTCCC	AnuGel_20R_chr6_121829104	TAGTCACGAGCCACCATGTC	544*	244	chr6:118238779+118239022	chr5:123771486-123771727	no	99	incomplete	n/a	n/a	n/a
4	P. anubis WGS	100	Anu-28	AnuGel_28	AnuGel_28F_chr14_121975617	GCTGGTTCTCATCTTCTGCC	AnuGel_28R_chr14_121975617	CTGTGGGCCAACTCTGTTTG	516*	216	chr14:118144847+118145062	chr11:129065935-129066149	no	100	incomplete	n/a	n/a	n/a
5	P. anubis WGS	101	Anu-6	AnuGel_6	AnuGel_6F_chr3_106816815	CTTCACTCCCTGTCCCACCC	AnuGel_6R_chr3_106816815	CCATACACTGCTTTTCTCTTCTG	550*	250	chr3:114695395+114695644	chr7:86941256-86941504	no	101	incomplete	n/a	n/a	n/a
6	P. hamadryas WGS	102	Ham-73	HamGel_73	HamGel_73F_chr12_65966178	TCCAAATGAATTCAGGCTCCAG	HamGel_73R_chr12_65966178	AGGGCAGATTGACATTCCAG	785*	485	chr12:40789881+40790365	chr2:179740918-179741401	no	102	incomplete	n/a	n/a	n/a
7	P. hamadryas WGS	103	Ham-59	HamGel_59	HamGel_59F_chr11_10552679	TTAGGACCTGCTCTCCCCTC	HamGel_59R_chr11_10552679	CCACCTCCgAGATTCAAGTG	698*	398	chr11:10108169+10108566	chr12:10352829-10353202	no	103	incomplete	n/a	n/a	n/a
8	P. hamadryas WGS	104	Ham-76	HamGel_76	HamGel_76F_chr13_75970583	GCCATATTAGCAGCCAATTCTC	HamGel_76R_chr13_75970583	ACAACAGTTCTCTCTACCACAG	680*	380	chr13:73817322+73817701	chr2:75160079-75160455	no	104	incomplete	n/a	n/a	n/a
9	P. hamadryas WGS	105	Ham-99	HamGel_99	HamGel_99F_chr19_51160972	CAGAAGTGTATGGCCTGGAG	HamGel_99R_chr19_51160972	TGGCCAGGATGATCTTGATC	524*	224	chr19:50877638-50877861	chr19:58702710-58702933	no	105	incomplete	n/a	n/a	n/a
10	P. hamadryas WGS	106	Ham-52	HamGel_52	HamGel_52F_chr8_48509346	ACTAGCAGCCTTCTCCCATC	HamGel_52R_chr8_48509346	CATGCCTCGGTTGAAGTGAG	663*	363	chr8:49047599-49047961	chr8:53926089-53926451	no	106	incomplete	n/a	n/a	n/a
11	P. hamadryas WGS	107	Ham-25	HamGel_25	HamGel_25F_chr3_70531252	ATGCCACTTGTGTCCAGAGC	HamGel_25R_chr3_70531252	TCTGGACAGTGAATGATAGAACC	499*	199	chr3:72943906+72944104	chr7:38245717-38245915	no	107	incomplete	n/a	n/a	n/a
12	P. hamadryas WGS	108	Ham-98	HamGel_98	HamGel_98F_chr19_48871849	TCACAGCAGCCTCAATCTCC	HamGel_98R_chr19_48871849	CCAAAGTGCTGGCCATTTAAC	560*	260	chr19:46520679+46520938	chr19:54044766-54045020	no	108	incomplete	n/a	n/a	n/a
13	P. hamadryas WGS	109	Ham-101	HamGel_101	HamGel_101F_chr20_71585673	CGGAATGTGAACCTACCAGC	HamGel_101R_chr20_71585673	CCAGGTTTTGTGGGCTCAAG	698*	398	chr20:68545223+68545620	chr16:86866323-86866732	no	109	incomplete	n/a	n/a	n/a
14	P. hamadryas WGS	110	Ham-1	HamGel_1	HamGel_1F_chr1_17298165	TGCGTATCATCGGCTAGCAG	HamGel_1R_chr1_17298165	GCAAACTGAAGGTAAGAAGGAAG	550*	250	chr1:20833085+20833334	chr1:18861058-18861307	no	110	incomplete	n/a	n/a	n/a
15	P. papio WGS	111	Papio-38	PapioGel_38	PapioGel_38F_chr11_56537458	GGTGAGGATGGGAGGGAAG	PapioGel_38R_chr11_56537458	AGCAACTCACCTAACCTCCC	599*	299	chr11:53315416+53315714	chr12:58125698-58125993	no	111	incomplete	n/a	n/a	n/a
16	P. papio WGS	112	Papio-43	PapioGel_43	PapioGel_43F_chr13_101929634	TCTGGATTTTGGAGAGCACTAAC	PapioGel_43R_chr13_101929634	ACAGGCAGTACTTCAATGGC	537*	237	chr13:97932254+97932490	chr2:107406287-107406523	no	112	incomplete	n/a	n/a	n/a
17	P. papio WGS	113	Papio-48	PapioGel_48	PapioGel_48F_chr14_40191327	GCCCATGAGTCAAATCTGGTC	PapioGel_48R_chr14_40191327	TGGCTGAAATGGCTGATGTTAC	684*	384	chr14:39067057+39067440	chr11:25803754-25804139	no	113	incomplete	n/a	n/a	n/a
18	P. papio WGS	114	Papio-33	PapioGel_33	PapioGel_33F_chr9_80767528	TGTACCTTTCCCCATCCCTC	PapioGel_33R_chr9_80767528	ACTATGGGGTATGAATCCAAAGG	682*	382	chr9:77732859+77733240	chr10:53802970-53803352	no	114	incomplete	n/a	n/a	n/a
19	P. papio WGS	115	Papio-17	PapioGel_17	PapioGel_17F_chr6_35446519	GATTACAGAACTGCGCCACC	PapioGel_17R_chr6_35446519	GTGTTCTATGGGGAGCATGC	700*	400	chr6:34509358+34509757	chr5:35096858-35097258	no	115	incomplete	n/a	n/a	n/a
20	P. cynocephalus WGS	116	Yel-14	YelGel_14	YelGel_14F_chr8_30234698	CTCTTACGGTCTGGAAGGGG	YelGel_14R_chr8_30234698	AACAAAACCCCAAGCAGACC	594*	294	chr8:28246374+28246667	deleted	no	116	incomplete	n/a	n/a	n/a
21	P. cynocephalus WGS	117	Yel-26	YelGel_26	YelGel_26F_chr20_27590204	CTATTGTGGGGAGGGGTTGG	YelGel_26R_chr20_27590204	CTCTGCCCTCTCCCACAC	592*	292	chr20:26553953+26554244	deleted	no	117	incomplete	n/a	n/a	n/a
22	P. cynocephalus WGS	118	Yel-4	YelGel_4	YelGel_4F_chr3_59354483	CAGGCAATTTTGGAGTCAGAC	YelGel_4R_chr3_59354483	ACGTGTAAAGGGAGAGAAAGAG	548*	248	chr3:61897190+61897437	chr7:49437688-49437935	no	118	incomplete	n/a	n/a	n/a
23	P. cynocephalus WGS	119	Yel-6	YelGel_6	YelGel_6F_chr4_25189149	TAGCAAGCACGACCTACCC	YelGel_6R_chr4_25189149	GCTGGTGTCTTAATTGCAAATGG	600*	300	chr4:24579763+24580062	chr6:24653573-24653872	no	119	incomplete	n/a	n/a	n/a
24	P. cynocephalus WGS	120	Yel-9	YelGel_9	YelGel_9F_chr5_39491370	ATCATCCTTCACTCCTTTCCC	YelGel_9R_chr5_39491370	AATGAGCCCAGATTGTGCC	600*	300	chr5:34498407+34498706	chr4:39802922-39803179	no	120	incomplete	n/a	n/a	n/a
25	P. cynocephalus WGS	121	Yel-11	YelGel_11	YelGel_11F_chr6_71736449	AAGATCTCTGACTTAGCTCAGTG	YelGel_11R_chr6_71736449	AGACTGGATCACTTTGTCCTC	600*	300	chr6:69144688+69144987	chr5:74324266-74324564	no	121	incomplete	n/a	n/a	n/a		yes
26	P. ursinus WGS	122	Cha-10	ChacmaGel_10	ChacmaGel_10F_chr2_54936495	CTGACTGTTCACATTTGGCAC	ChacmaGel_10R_chr2_54936495	GGGAACAGAGAGAGACCCTG	690*	390	chr2:48875647+48876036	chr3:11430683-11431095	no	122	incomplete	n/a	n/a	n/a
27	P. ursinus WGS	123	Cha-47	ChacmaGel_47	ChacmaGel_47F_chr15_48492679	TTCTCTaTCAGTGGAAATGGAGG	ChacmaGel_47R_chr15_48492679	GATCATGCCACCACACTCAG	577*	277	chr15:40248534+40248810	chr9:35764067-35764351	no	123	incomplete	n/a	n/a	n/a
28	P. ursinus WGS	124	Cha-33	ChacmaGel_33	ChacmaGel_33F_chr10_2459262	TCCCTGTACTGACCTTCTGC	ChacmaGel_33R_chr10_2459262	CATGGGTCATTGTGTCCTAGG	598*	298	chr10:2393256+2393553	chr20:60491000-60491297	no	124	incomplete	n/a	n/a	n/a
29	P. ursinus WGS	125	Cha-14	ChacmaGel_14	ChacmaGel_14F_chr3_46334629	GACATGAGCAAAAGACAGGAAC	ChacmaGel_14R_chr3_46334629	CCAGGATCGCACTGTTGTAC	620*	320	chr3:48670926-48671245	chr7:69315332-69315672	no	125	incomplete	n/a	n/a	n/a
30	P. ursinus WGS	126	Cha-7	ChacmaGel_7	ChacmaGel_7F_chr1_212527973	CATTAAAACTGTGCAGCCTTAGG	ChacmaGel_7R_chr1_212527973	AACAGAGCGAGACCTGGTC	550*	250	chr1:212872628-212872877	chr1:236368638-236368878	no	126	incomplete	n/a	n/a	n/a
31	P. ursinus WGS	127	Cha-15	ChacmaGel_15	ChacmaGel_15F_chr3_130921756	CTGGCTGGCTCTGTTTAAGC	ChacmaGel_15R_chr3_130921756	AAAGGGGCTAAAGGGACAGG	680*	380	chr3:127744877+127745256	chr7:105234294-105234666	no	127	incomplete	n/a	n/a	n/a
32	P. ursinus WGS	128	Cha-43	ChacmaGel_43	ChacmaGel_43F_chr13_105026042	CACCACAGATAATGACTTGGGG	ChacmaGel_43R_chr13_105026042	TGTTGTTGGGTAGAATGTTCCAC	752*	452	chr13:100660075+100660526	chr2:110059934-110060383	no	128	incomplete	n/a	n/a	n/a
33	P. kindae WGS	129	Kinda-49	KindaGel_49	KindaGel_49F_chr4_24942646	CCACCCTTCTCAGACAAATCC	KindaGel_49R_chr4_24942646	ATCATTGCTTCCAGGGGTTG	594*	294	chr4:24336750+24337043	chr6:24399953-24400247	no	129	incomplete	n/a	n/a	n/a
34	P. kindae WGS	130	Kinda-196	KindaGel_196	KindaGel_196F_chr16_65997790	TCTCCCACATGTCCTTCTGC	KindaGel_196R_chr16_65997790	AACCTCCCAAGTTGCTGG	693*	393	chr16:63867621+63868013	chr17:70476494-70476827	no	130	incomplete	n/a	n/a	n/a
35	P. kindae WGS	131	Kinda-122	KindaGel_122	KindaGel_122F_chr9_114750427	GGACACTTCTCCAATGTCACC	KindaGel_122R_chr9_114750427	AGAGAGGGTGATAGCTGAAGG	811*	511	chr9:110411173+110411683	chr10:120573628-120574078	no	131	incomplete	n/a	n/a	n/a
36	P. kindae WGS	132	Kinda-145	KindaGel_145	KindaGel_145F_chr12_57734410	TGGGTATGACtTCCTCCAGG	KindaGel_145R_chr12_57734410	GCAATTTCCGCCTCCTGG	695*	395	chr12:32652420+32652814	chr2:171558484-171558880	no	132	incomplete	n/a	n/a	n/a
37	P. kindae WGS	133	Kinda-222	KindaGel_222	KindaGel_222F_chr19_28735920	AAACATACAAGAGGCCAGGC	KindaGel_222R_chr19_28735920	ATCTGCTGACCTCGTGATCC	791*	491	chr19:27518057+27518547	chr19:33402840-33403258	no	133	incomplete	n/a	n/a	n/a
38	P. kindae WGS	134	Kinda-9	KindaGel_9	KindaGel_9F_chr1_69886741	CAAGGCAATGTGGTGAGTCC	KindaGel_9R_chr1_69886741	GCCTCAACCTCCTCAGTAAC	669*	369	chr1:72167703+72168071	chr1:70594467-70594835	no	134	incomplete	n/a	n/a	n/a
39	P. kindae WGS	135	Kinda-184	KindaGel_184	KindaGel_184F_chr15_86043688	ATGGCACTGCTGAGTTAACC	KindaGel_184R_chr15_86043688	AGGAGGAGTTGGCATCTATTATC	548*	248	chr15:76649074+76649321	chr9:72466964-72467208	no	135	incomplete	n/a	n/a	n/a
40	P. kindae WGS	136	Kinda-109	KindaGel_109	KindaGel_109F_chr8_143835217	TGCTTGGCCTGTGGTAGAC	KindaGel_109R_chr8_143835217	ATTGACCACCAGCCAACTTC	799*	499	chr8:139132461+139132959	chr8:145785378-145785878	no	136	incomplete	n/a	n/a	n/a
41	P. kindae WGS	137	Kinda-92	KindaGel_92	KindaGel_92F_chr7_26986835	AGGTCATAGCCAAACCTACG	KindaGel_92R_chr7_26986835	TTTTGCGTATGGTCCTGTGC	544*	244	chr7:24898517+24898760	chr15:50932129-50932363	no	137	incomplete	n/a	n/a	n/a
42	P. kindae WGS	138	Kinda-236	KindaGel_236	KindaGel_236F_chr20_71474755	CTGAGAGGTGGGGCTGAC	KindaGel_236R_chr20_71474755	TTACACAAGAGCCCAGCAC	741*	441	chr20:68437044+68437484	chr16:86751724-86751841	no	138	incomplete	n/a	n/a	n/a
43	P. kindae WGS	139	Kinda-135	KindaGel_135	KindaGel_135F_chr11_59464563	AACCTCAAATTCCCACTTTTAGC	KindaGel_135R_chr11_59464563	TTGTGTTCAGTTGGTGCTTG	857*	557	chr11:56128517+56129073	chr12:60904277-60904839	no	139	incomplete	n/a	n/a	n/a
44	P. kindae WGS	140	Kinda-44	KindaGel_44	KindaGel_44F_chr3_152632841	ACCATAACCACCTAAGCAGTAG	KindaGel_44R_chr3_152632841	TGAGACTGCATGCAAGAATGAG	857*	557	chr3:148387711+148388267	chr7:126075280-126075819	no	140	incomplete	n/a	n/a	n/a
45	P. kindae WGS	141	Kinda-53	KindaGel_53	KindaGel_53F_chr4_34515183	ATAGAATTGAAATGCATCCACCC	KindaGel_53R_chr4_34515183	GCTTCAAGATCCCTGCAGAG	518*	218	chr4:32909016+32909233	chr6:33618361-33618573	no	141	incomplete	n/a	n/a	n/a
46	P. kindae WGS	142	Kinda-27	KindaGel_27	KindaGel_27F_chr2_105637367	ACCTAGACAGTGTGGCCTAC	KindaGel_27R_chr2_105637367	CAGAGCTTGCTTGGGATGAC	887*	587	chr2:98251587+98252173	chr3:37210037-37210623	no	142	incomplete	n/a	n/a	n/a
47	P. kindae WGS	143	Kinda-180	KindaGel_180	KindaGel_180F_chr15_31981664	TGTTCCCAAGCATAAGAAGGC	KindaGel_180R_chr15_31981664	GGAGAATAACGTAAACTCCGGG	542*	242	chr15:27215978+27216219	chr9:110332844-110333089	no	143	incomplete	n/a	n/a	n/a
48	P. kindae WGS	144	Kinda-213	KindaGel_213	KindaGel_213F_chr19_2954409	GATGATGGCTACACGAACGG	KindaGel_213R_chr19_2954409	TGTGCGACAGTGTGAGAC	824*	524	chr19:2805676+2806199	chr19:3016686-3017179	no	144	incomplete	n/a	n/a	n/a
49	P. kindae WGS	145	Kinda-166	KindaGel_166	KindaGel_166F_chr14_48313497	TGAGAGCATGTTTTGTTTGTTCG	KindaGel_166R_chr14_48313497	GACACTCCTAGCCTTCCCAC	759*	459	chr14:46914402+46914860	chr11:18099981-18100445	no	145	incomplete	n/a	n/a	n/a
50	P. kindae WGS	146	Kinda-70	KindaGel_70	KindaGel_70F_chr5_77594735	ACTAAACTAGAACTGACACCCC	KindaGel_70R_chr5_77594735	ATTTGCTAGTCGACATGGCC	567*	267	chr5:71507224+71507490	chr4:57889863-57890130	no	146	incomplete	n/a	n/a	n/a
51	P. kindae WGS	147	Kinda-199	KindaGel_199	KindaGel_199F_chr16_70388280	AGAAGGTCTGAGTGCTGTGG	KindaGel_199R_chr16_70388280	GAGTGCTGCCGGAGTTTG	529*	229	chr16:68041519+68041747	chr17:74628066-74628304	no	147	incomplete	n/a	n/a	n/a
52	P. kindae WGS	148	Kinda-173	KindaGel_173	KindaGel_173F_chr14_111874251	CTGTGCCTCCCAGTTTCAAG	KindaGel_173R_chr14_111874251	GTGTGCCGCGCTTACTAAG	883*	583	chr14:108349620+108350202	chr11:118890234-118890616	no	148	incomplete	n/a	n/a	n/a
1	Panu_2.0	149	27129	27129	bab_27129_C6-1384_ECB_F	CACATGCTTTCAATTGCATCTT	bab_27129_C6-1384_ECB_R	TGCACTCAGTGTTCATTTCCA	595	284	chr6:13847677+13848271	chr5:13831302+13831585	yes	149	AluMacYa3	2.1	1 central	AluMacYa3	poly Papio; KB; absent others	yes
2	Panu_2.0	150	27203	27203	bab_27203_C6-1671_ECB_F	CTGTTCCAAGGATTCTCGAAG	bab_27203_C6-1671_ECB_R	TTGAAGCCAAGATACTCTGATTG	898	554	chr6:16717916+16718813	chr5:16704659+16705212	yes	150	AluMacYa3	2.8	1 central	AluMacYa3	poly Papio; KB, M; absent TD, L, M, R	yes
3	Panu_2.0	151	27444	27444	bab_27444_C6-2522_ECB_F	GATCCTTGTTGGTAGTTAGAGATTCTG	bab_27444_C6-2522_ECB_R	GGCACTTGGTGTATGTCAGG	953	640	chr6:25228687+25229639	chr5:25410216+25410855	yes	151	subfamily0	3.2	1 central	AluMacYa3	poly Papio, TD, L; absent KB, M, M, R	no
4	Panu_2.0	152	TF69371	69371	69371_c15-9379_TCF_F	AGCCTTGTTGTACTCATGGATT	69371_c15-9379_TCF_R	GTCCACAGAGGTGAGGCTTG	821	495	chr15:93795770+93796590	chr9:89973404+89973898	yes	152	subfamily18	2.1	9	AluYRa4	poly Papio; KB; absent others	yes
5	Panu_2.0	153	TF69382	69382	69382_c15-9389_TCF_F	AGCAGCTGGCTCAGTGATTT	69382_c15-9389_TCF_R	AGCAGGACTAAGCCCCAACT	674	359	chr15:93896603+93897276	chr9:90084329+90084687	yes	153	AluMacYa3	2.5	1 central	AluMacYa3	poly Papio, KB, T, L; absent M, M, R	yes
6	Panu_2.0	154	AP216	AP_216	Bab_216_C1-3140_AP_F	TATGCATGTCAGGGCCTCTT	Bab_216_C1-3140_AP_R	TCAGGGAAACCAAAAGCTGA	896	584	chr1:3140956+3141851	chr4:930218-930801	yes	154	AluMacYa3	3.5	1 central	AluMacYa3	poly Papio, KB, absent Mandrill and Rhesus	yes
7	Panu_2.0	155	AP148	AP_148	Bab_148_C1-1905_AP_F	CACCTAGGCATCCACCAAAT	Bab_148_C1-1905_AP_R	TGTTCACCTGTACCCCTGTG	1071	760	chr1:1905480+1906550	chr4:2135349-2136108	yes	155	subfamily101	0.7	2	AluYRa1	poly Papio; TD; absent KB, L, M, M, R	no
8	Panu_2.0	156	TB 48	TB_48	Bab_48_chr2_1541_TB_F	TGACACCTAGATTTCAGCCTTG	Bab_48_chr2_1541_TB_R	CTATAGGGCCAGTTGGATGC	783	457	chr2:154137832+154138614	chr3:131368323-131368691	yes	156	AluMacYa3	3.2	1 central	AluMacYa3	poly Papio, TD, L; absent KB, M, M, R	no
9	Panu_2.0	157	TB 79	TB_79	Bab_79_chr2_1670_TB_F	TGTAGACCAGGAATGGAATAATTT	Bab_79_chr2_1670_TB_R	CCTAGACATCCACAGAGATTAGCC	717	387	chr2:167022392+167023098	chr3:26737513-26737899	yes	157	AluMacYa3	3.9	1 central	AluMacYa3	poly Papio, TD, L; absent KB, M, M, R	no
10	Panu_2.0	158	TB 3005	TB_3005	Bab_3005_chr6_8055_TB_F	GGGCAATGAACTTTCAGCTT	Bab_3005_chr6_8055_TB_R	GGGTGTTTGTGTGCATGTGT	859	536	chr6:80551989+80552847	chr5:85836871-85837406	yes	158	subfamily47	1.8	1	AluMacYa3	poly Papio, KB, T, L; absent M, M, R	yes
11	Panu_2.0	159	TB 3030	TB_3030	Bab_3030_chr6_9563_TB_F	CCAGTGGCAACTTTGTCAAG	Bab_3030_chr6_9563_TB_R	CCCTAGTATTCTCCAGTGACAACA	648	329	chr6:95633087+95633731	chr5:101254820-101255148	yes	159	AluMacYa3	3.5	1 central	AluMacYa3	poly Papio; KB; absent others	yes
12	Panu_2.0	160	TB 3042	TB_3042	Bab_3042_chr6_9985_TB_F	CATTTCAATGGAGACCTGAAA	Bab_3042_chr6_9985_TB_R	TTTCCAGAGAGCAAACTCCAA	783	453	chr6:99857988+99858766	chr5:105529433-105529885	yes	160	AluMacYa3	1.4	1 central	AluMacYa3	poly Papio, TD, L; absent KB, M, M, R	no
13	Panu_2.0	161	bsft-1	Sft-1	baboonsf_1F_12_14203085	TTgTGcAAGTCTTAGCAATGG	baboonsf_1R_12_14203085	CTAAAACAGACCCCAcGTGTC	582	256	chr12:14203085-14204085	chr2:152816863-152817535	yes	161	subfamily2	0.7	1	AluMacYa3	poly Papio; KB; absent others	yes
14	Panu_2.0	162	1--5	bsf1-5	BaboonOrder1_5F_1_24863297	CCCTCTCTGATCCCGTTTCC	BaboonOrder1_5R_1_24863297	GTGGCTCAGGGGtATGGTC	550	226	chr1:24863297-24864297	chr1:22981153-22981840	yes	162	subfamily6	1.1	1	AluMacYa3	poly Papio, KB, T, L; absent M, M, R	yes
15	Panu_2.0	163	1--49	bsf1-49	BaboonOrder1_49F_13_57771434	CCTTTGATGTTTGCTGTCCC	BaboonOrder1_49R_13_57771434	GGCCCTTTaGTTGGTTCAGG	798	504	chr13:57771434-57772434	chr2:59032313-59032994	yes	163	subfamily27	0.7	1	AluMacYa3	poly Papio, KB, T, L; absent M, M, R	yes
16	Panu_2.0	164	1--54	bsf1-54	BaboonOrder1_54F_2_179322999	CACAaGGCTTTATCAGTGATGC	BaboonOrder1_54R_2_179322999	AATAACCCTGtTGCaTCCATTTC	488	204	chr2:179322999-179323999	chr3:188981129-188981811	yes	164	subfamily28	1.8	1	AluMacYa3	poly Papio, KB, T, L; absent M, M, R	yes
17	Panu_2.0	165	2--9	bsf2-9	baboonsfOrder2_9F_1_17127418	CCAGACATCTTTCAaTGCATGC	baboonsfOrder2_9R_1_17127418	AAGACAGGCCAGGCGAGG	726	432	chr1:17127418-17128418	chr1:15017650-15018320	yes	165	subfamily36	1.4	1	AluMacYa3	poly Papio; KB; absent others	yes
18	Panu_2.0	166	2--10	bsf2-10	baboonsfOrder2_10F_14_23985560	TGTGCCATCTCAGTTTTGGC	baboonsfOrder2_10R_14_23985560	CTTgCTAGCTgTCTCTTTCCAG	589	296	chr14:23985560-23986560	chr11:41112281-41112981	yes	166	subfamily36	0.7	1	AluMacYa3	poly Papio; KB; L; absent TD, M, M, R	yes
19	Panu_2.0	167	2--33	bsf2-33	baboonsfOrder2_33F_5_123838728	TGTTGTCCCTAGCCAATACTTG	baboonsfOrder2_33R_5_123838728	AAAGCAGAGCCTTGTCCTC	673	377	chr5:123838728-123839728	chr4:134464655-134465355	yes	167	subfamily46	0.3	1	AluMacYa3	poly Papio, TD, L; absent KB, M, M, R	yes
20	Panu_2.0	168	2--56	bsf2-56	baboonsfOrder2_56F_15_33213398	CCTCATCAGCCATTTTCTTGTTC	baboonsfOrder2_56R_15_33213398	AGCATGTCATAGTgGAATGGAG	594	297	chr15:33213398-33214398	chr9:104316768-104317487	yes	168	AluMacYa3	2.1	1	AluMacYa3	poly Papio, TD; absent KB, L, M, M, R	no
21	Panu_2.0	169	3--33	bsf3-33	Baboonsf3_33F_9_90530374	TGAGCAGACAGTGACACCTG	Baboonsf3_33R_9_90530374	AGAACTGaCCTTGCAATTCTTG	662	363	chr9:90530374-90531374	chr10:100531995-100532693	yes	169	subfamily77	0.7	8	AluYRa4	poly Papio, TD, L; absent KB, M, M, R	no
22	Panu_2.0	170	3--52	bsf3-52	Baboonsf3_52F_6_50330043	TGTGTTCCAGAGGATAATGTGC	Baboonsf3_52R_6_50330043	TCTAaGATTGTGTGTGGGAGG	593	297	chr6:50330043-50331043	chr5:53557451-53558133	yes	170	subfamily87	0.4	4	AluYRa1	poly Papio, KB, T, L; absent M, M, R	yes
23	Panu_2.0	171	3--93	bsf3-93	Baboonsf3_93F_13_80390503	TCATCCTTTCAGCTTTGGTGC	Baboonsf3_93R_13_80390503	TGAGGTGAGGGTTAGCTGTG	530	250	chr13:80390503-80391503	chr2:81740629-81741314	yes	171	subfamily106	0.7	5	AluYRb	poly Papio, TD, L; absent KB, M, M, R	no
24	Panu_2.0	172	3--127	bsf3-127	Baboonsf3_127F_19_34138282	GCcCTGATTAGtGATGAGTTGG	Baboonsf3_127R_19_34138282	CTACCCTGcAGCTCCTCTC	595	293	chr19:34138282-34139282	chr19:40302275-40302991	yes	172	subfamily124	1.4	1	AluMacYa3	poly Papio, TD, L; absent KB, M, M, R	no

## Sheet: Allele frequency
	Species	Common Name	Origin	ID	Sample	Gelada-3	Gelada-3	Gelada-5	Gelada-5	Gelada-10	Gelada-10	Gelada-11	Gelada-11	Gelada-12	Gelada-12	Gelada-14	Gelada-14	Gelada-17	Gelada-17	Gelada-21	Gelada-21	Gelada-23	Gelada-23	Gelada-24	Gelada-24	Gelada-26	Gelada-26	Gelada-28	Gelada-28	Gelada-29	Gelada-29	Gelada-32	Gelada-32	Gelada-34	Gelada-34	Gelada-35	Gelada-35	Gelada-36	Gelada-36	Gelada-37	Gelada-37	Gelada-41	Gelada-41	Gelada-44	Gelada-44	Gelada-48	Gelada-48	Gelada-49	Gelada-49
	Theropithecus gelada	Gelada monkey	SDFZ	KB10538	KB10538	1	1	1	1	1	1	1	0	1	0	1	1	1	1	1	1	1	1	1	1	1	1	1	1	1	1	1	1	1	1	1	1	1	1	1	1	1	1	1	1	1	1	1	1
	Papio anubis	Reference Olive Baboon	Jeff Rogers	27861	27861	0	0	0	0	1	1	0	0	0	0	0	0	0	0	1	1	0	0	1	1	0	0	1	0	0	0	0	0	0	0	0	0	0	0	0	0	0	0	0	0	0	0	0	0
	Papio anubis	Olive baboon	Jeff Rogers	L142	L142	0	0	-9	-9	1	0	1	0	0	0	0	0	0	0	1	1	0	0	1	0	1	0	0	0	0	0	0	0	0	0	0	0	0	0	0	0	0	0	0	0	0	0	1	0
	Papio anubis	Olive baboon	Jeff Rogers	LIV5	LIV5	0	0	0	0	1	1	0	0	0	0	0	0	0	0	1	1	0	0	1	1	0	0	0	0	0	0	0	0	0	0	0	0	0	0	-9	-9	0	0	0	0	0	0	0	0
	Papio hamadryas	Ethiopian-wild hamadryas baboon	Jeff Rogers	97124	97124	0	0	0	0	0	0	1	1	1	0	1	1	1	1	1	1	0	0	0	0	0	0	0	0	1	1	0	0	0	0	0	0	0	0	1	1	0	0	0	0	0	0	0	0
	Papio papio	Guinea baboon	Jeff Rogers	28547	28547	0	0	0	0	1	1	1	0	0	0	0	0	0	0	1	1	0	0	0	0	0	0	1	1	0	0	0	0	0	0	1	1	1	1	0	0	0	0	0	0	0	0	0	0
	Papio papio	Guinea baboon	Jeff Rogers	30388	30388	0	0	0	0	1	1	0	0	0	0	0	0	0	0	1	1	0	0	0	0	0	0	1	1	0	0	0	0	0	0	1	1	1	1	0	0	0	0	0	0	0	0	0	0
	Papio cynocephalus	Yellow baboon	Jeff Rogers	16066	3130	0	0	-9	-9	0	0	1	0	0	0	0	0	1	0	1	1	1	1	1	0	0	0	0	0	0	0	0	0	1	1	0	0	0	0	0	0	0	0	1	1	1	0	1	0
	Papio cynocephalus	Yellow baboon	Jeff Rogers	16098	5026	1	1	-9	-9	0	0	0	0	0	0	0	0	0	0	1	1	1	1	0	0	1	0	0	0	0	0	0	0	1	1	0	0	0	0	0	0	0	0	1	1	1	1	1	0
	Papio ursinus	Chacma baboon	Jeff Rogers	28697	28697	1	0	1	1	0	0	1	0	0	0	0	0	0	0	0	0	0	0	0	0	0	0	0	0	0	0	0	0	1	1	0	0	0	0	0	0	1	1	0	0	0	0	0	0
	Papio ursinus	Chacma baboon	Jeff Rogers	28755	28755	0	0	1	1	0	0	0	0	0	0	0	0	0	0	0	0	0	0	0	0	0	0	0	0	0	0	0	0	1	1	0	0	0	0	0	0	1	1	0	0	0	0	0	0
	Papio kindae	Kinda baboon	Jeff Rogers	34474	BZ11050	1	1	0	0	0	0	1	0	1	0	0	0	0	0	1	1	0	0	0	0	1	1	0	0	0	0	1	1	0	0	0	0	0	0	0	0	0	0	0	0	0	0	1	0
	Papio kindae	Kinda baboon	Jeff Rogers	34472	BZ11047	1	1	-9	-9	0	0	0	0	0	0	0	0	0	0	1	1	0	0	0	0	1	0	0	0	0	0	0	0	0	0	0	0	0	0	0	0	0	0	0	0	0	0	0	0
	Macaca mulatta	Rhesus Macaque	Coriell	NG07109	NG07109	0	0	0	0	0	0	0	0	0	0	0	0	0	0	0	0	0	0	0	0	0	0	0	0	0	0	0	0	0	0	0	0	0	0	0	0	0	0	0	0	0	0	0	0
		Sample ID	KB10538	L142	LIV5	97124	28547	30388	16066	16098	28697	28755	34474	NG07109
		Common Name	gelada	Olive	Olive	Hamadryas	Guinea	Guinea	Yellow	Yellow	Chacma	Chacma	Kinda	rhesus
		Allele frequency	0.95	0.181034	0.186441	0.25	0.175	0.166667	0.220339	0.194915	0.175	0.15	0.241667	0
				0.181175
[truncated: 82 more columns]

## Sheet: RM-output
Locus	SW	perc	perc	perc	query	position	in	query	sense	matching	position	in	repeat			Papio Alu	perc	Steely, et al 2018	Derived
#	score	div.	del.	ins.	sequence	begin	end	(left)	strand	repeat	begin	end	(left)		#	Subfamily	div.	Cluster	from
6	2452	2.11	0	0	Gelada-10_chr2:174759687-174760226	170	454	-86	C	AluMacYa3	0	285	1		6	AluMacYa3	2.1	1	AluMacYa3
12	2524	0.3	0	0	Gelada-21_chr3:170899135-170899663	105	387	-142	+	subfamily77	1	283	0		12	subfamily77	0.3	8	AluYRa4
43	2317	2.8	0	1.8	Gelada-58_chr10:30626613-30627160	150	437	-111	+	subfamily64	1	283	0		43	subfamily64	2.8	1	AluMacYa3
48	2386	3.9	0	0	Gelada-64_chr11:103502271-103502777	96	377	-130	+	subfamily55	2	283	0		48	subfamily55	3.9	1	AluMacYa3
53	2342	1.5	0	1.1	Gelada-72_chr15:62499938-62500472	128	401	-134	+	AluMacYb2	2	272	0		53	AluMacYb2	1.5	n/a	n/a
68	2293	3.2	0	0.7	Gelada-87_chr18:71501979-71502506	106	389	-139	+	subfamily70	1	282	0		68	subfamily70	3.2	AluY	AluY
70	2490	0.7	0	0.7	Gelada-90_chr19:19324069-19324596	99	385	-143	+	AluMacYa3	1	285	0		70	AluMacYa3	0.7	1 central	AluMacYa3
86	2422	2.13	0	0	Gelada-116_chr8:119368196-119368701	100	381	-125	C	subfamily58	0	282	1		86	subfamily58	2.1	1	AluMacYa3
149	2354	2.1	0.3	0	27129_chr6:13847678-13848271	231	514	-80	+	AluMacYa3	1	285	0		149	AluMacYa3	2.1	1 central	AluMacYa3
150	2356	2.8	0.3	0	27203_chr6:16717917-16718813	250	533	-364	+	AluMacYa3	1	285	0		150	AluMacYa3	2.8	1 central	AluMacYa3
152	2461	2.1	0	0	69371_chr15:93795771-93796590	37	318	-502	+	subfamily18	1	282	0		152	subfamily18	2.1	9	AluYRa4
153	2455	2.5	0	0	69382_chr15:93896604-93897276	285	569	-104	+	AluMacYa3	1	285	0		153	AluMacYa3	2.5	1 central	AluMacYa3
154	2378	3.5	0.3	0.3	AP_216_chr1:3140957-3141851	445	729	-166	+	AluMacYa3	1	285	0		154	AluMacYa3	3.5	1 central	AluMacYa3
158	2358	1.8	0	0.3	TB_3005_chr6:80551990-80552847	222	504	-354	+	subfamily47	2	283	0		158	subfamily47	1.8	1	AluMacYa3
159	2341	3.5	0.3	0	TB_3030_chr6:95633088-95633731	101	384	-260	+	AluMacYa3	1	285	0		159	AluMacYa3	3.5	1 central	AluMacYa3
161	2510	0.7	0	0	Sft-1_chr12:14203086-14204085	544	826	-174	C	subfamily2	0	283	1		161	subfamily2	0.7	1	AluMacYa3
162	2482	1.1	0	0	bsf1-5_chr1:24863298-24864297	543	825	-175	C	subfamily6	0	283	1		162	subfamily6	1.1	1	AluMacYa3
163	2456	0.7	0	1.8	bsf1-49_chr13:57771435-57772434	539	825	-175	C	subfamily27	0	283	2		163	subfamily27	0.7	1	AluMacYa3
164	2459	1.8	0	0	bsf1-54_chr2:179323000-179323999	544	826	-174	C	subfamily28	0	283	1		164	subfamily28	1.8	1	AluMacYa3
165	2487	1.4	0	0.3	bsf2-9_chr1:17127419-17128418	538	822	-178	C	subfamily36	0	284	1		165	subfamily36	1.4	1	AluMacYa3
166	2534	0.7	0	0	bsf2-10_chr14:23985561-23986560	523	806	-194	C	subfamily36	0	284	1		166	subfamily36	0.7	1	AluMacYa3
167	2516	0.3	0	0	bsf2-33_chr5:123838729-123839728	541	822	-178	C	subfamily46	0	282	1		167	subfamily46	0.3	1	AluMacYa3
170	2497	0.4	0	0	bsf3-52_chr6:50330044-50331043	501	781	-219	+	subfamily87	1	281	0		170	subfamily87	0.4	4	AluYRa1
