# Supplementary material for: Alu insertion polymorphisms shared by Papio baboons and Theropithecus gelada reveal an intertwined common ancestry
Source: Mob DNA. 2019 Nov 26;10:46. doi: 10.1186/s13100-019-0187-y (PMC6880559; doi:10.1186/s13100-019-0187-y)
Supplement: Supplementary file 3 — Additional file 3. An Excel file summarizing the PCR validation of computational predictions. (XLSX 45.6kb) [file 13100_2019_187_MOESM3_ESM.xlsx]

## Sheet: Sheet1
																																WGS data samples obtained from ncbi sra database
																													12 Papio WGS			WGS samples
		Alu			Predicted insertion	Ascertained from WGS: T. gelada: 38168					orientation		PCR genotype data for these 96 loci using first column only; presence or absence																possible shared IDs			Species	Isolate	Source	Sex	Platform	Runs	Bytes	Bases	ncbi sra link
	#	Locus ID	[Panu_2.0] coordinates	In silico in [Mmul8.0.1]	coordinate [Mmul8.0.1]	Predicted shared in these ID #'s					0 is forward		38168	27861	L142	LIV5	97124	28547	30388	16066	16098	28697	28755	34474	34472	KB10538		1	16066	P. cynocephalus		Macaca mulatta	17573	Blood	Female	Illumina	22	56.21	102.29	https://www.ncbi.nlm.nih.gov/Traces/study/?acc=SAMN00766305
	1	Gelada-3	chr1:107004596-107004822	chr1:106998559+106998785	106998634	16098	28697	34449	34474	38168	0			0	0	0	0	0	0	0	1	1	0	1	1	1		2	16098	P. cynocephalus		Papio anubis	LIV5	Blood	Female	Illumina	6	52.55	92.89	https://www.ncbi.nlm.nih.gov/Traces/study/?acc=SAMN02866411
	2	Gelada-4	chr1:131055659+131055862	chr1:131805565+131805768	131805638	97124	97074			38168	1			0	0	0	1	0	0	0	0	0	0	0	0	0		3	28697	P. ursinus		Papio anubis	L142	Blood	Male	Illumina	6	41.98	77.35	https://www.ncbi.nlm.nih.gov/Traces/study/?acc=SAMN02866410
	3	Gelada-5	chr1:132329331-132329563	chr1:133168216+133168448	133168295	28697	28755	97074		38168	1			0	-9	0	0	0	0	-9	-9	1	1	0	-9	1		4	28755	P. ursinus		Papio cynocephalus	16066	Blood	Female	Illumina	7	56.25	92.69	https://www.ncbi.nlm.nih.gov/Traces/study/?acc=SAMN02866414
	4	Gelada-7	chr2:10763215+10763444	chr2:11536518+11536747	11536588	16066	28547	34449	34474	38168	1			0	0	0	0	0	0	0	0	0	0	0	0	0		5	28547	P. papio		Papio cynocephalus	16098	Blood	Female	Illumina	6	41.7	76.68	https://www.ncbi.nlm.nih.gov/Traces/study/?acc=SAMN02866415
	5	Gelada-9	chr2:140997955+140998155	chr2:156681652+156681852	156681747	34449	34474			38168	1			0	0	0	0	0	0	0	0	0	0	0	0	1		6	30388	P. papio		Papio hamadryas	97074	Blood	Not determined	Illumina	5	48.29	80.3	https://www.ncbi.nlm.nih.gov/Traces/study/?acc=SAMN03073709
	6	Gelada-10	chr2:174759686-174760226	chr2:195006770+195006990	195006855	28547	30388	LIV5	L142	38168	0			1	1	1	0	1	1	0	0	0	0	0	0	1		7	LIV5	P. anubis		Papio hamadryas	97124	Blood	Not determined	Illumina	4	49.33	77.16	https://www.ncbi.nlm.nih.gov/Traces/study/?acc=SAMN03073710
	7	Gelada-11	chr3:27504326+27504625	chr3:28268751+28269050	28268916	L142	34449			38168	0			0	1	0	1	1	0	1	0	1	0	1	0	1		8	L142	P. anubis		Papio kindae	34449	Blood	Female	Illumina	5	84.53	131.23	https://www.ncbi.nlm.nih.gov/Traces/study/?acc=SAMN03072807
	8	Gelada-12	chr3:30193614+30193781	chr3:31090396+31090563	31090466	97124	97074	34449	34474	38168	0			0	0	0	1	0	0	0	0	0	0	1	0	1		9	97124	P. hamadryas		Papio kindae	34474	Blood	Female	Illumina	4	76.87	117.47	https://www.ncbi.nlm.nih.gov/Traces/study/?acc=SAMN03072185
	9	Gelada-14	chr3:58222672-58222869	chr3:52300937+52301134	52301047	97124	97074			38168	0			0	0	0	1	0	0	0	0	0	0	0	0	1		10	97074	P. hamadryas; do not have DNA		Papio papio	28547	Blood	Not determined	Illumina	5	61.5	100.44	https://www.ncbi.nlm.nih.gov/Traces/study/?acc=SAMN03073711
	10	Gelada-16	chr3:63935451+63935670	chr3:61486404+61486623	61486515	LIV5	L142	34449		38168	0			0	0	0	0	0	0	0	0	0	0	0	0	0		11	34449	P. kindae; do not have DNA		Papio papio	30388	Blood	Male	Illumina	5	60.74	98.85	https://www.ncbi.nlm.nih.gov/Traces/study/?acc=SAMN02866416
	11	Gelada-17	chr3:119189256+119189503	chr3:111380842+111381089	111380937	16066	97124	97074		38168	0			0	0	0	1	0	0	1	0	0	0	0	0	1		12	34474	P. kindae		Papio ursinus	28697	Blood	Female	Illumina	5	44.67	79.01	https://www.ncbi.nlm.nih.gov/Traces/study/?acc=SAMN02866413
	12	Gelada-21	chr3:170899134-170899663	chr3:175805714+175805919	175805818	34449	34474			38168	0			1	1	1	1	1	1	1	1	0	0	1	1	1			38168	T. gelada; sample name for 891096		Papio ursinus	28755	Blood	Female	Illumina	8	48.58	83.38	https://www.ncbi.nlm.nih.gov/Traces/study/?acc=SAMN02866412
	13	Gelada-22	chr4:24408223+24408787	chr4:25015048+25015290	25015167	LIV5	34449	34474		38168	0			1	1	1	1	1	1	1	1	1	1	1	1	1						Theropithecus gelada	891096	Blood	Female	Illumina	3	72.59	183.32	https://www.ncbi.nlm.nih.gov/Traces/study/?acc=SAMN06167567
	14	Gelada-23	chr4:48491501+48491739	chr4:50305554+50305792	50305689	16066	16098	28697		38168	1			0	0	0	0	0	0	1	1	0	0	0	0	1
	15	Gelada-24	chr4:57687064+57687445	chr4:59673529+59673726	59673598	16066	LIV5	L142	34449	38168	1			1	1	1	0	0	0	1	0	0	0	0	0	1
	16	Gelada-25	chr4:61986337+61986537	chr4:64126618+64126818	64126727	16098	28697			38168	1			0	0	0	0	0	0	0	0	0	0	0	0	1
	17	Gelada-26	chr4:62044686-62044966	chr4:64186171+64186451	64186335	16098	28697	34449	34474	38168	1			0	1	0	0	0	0	0	1	0	0	1	1	1
	18	Gelada-28	chr5:17262437+17262644	chr5:21898716+21898923	21898844	28547	30388			38168	0			1	0	0	0	1	1	0	0	0	0	0	0	1
	19	Gelada-29	chr5:30755061+30755291	chr5:35575366+35575596	35575457	97124	97074	34449		38168	0			0	0	0	1	0	0	0	0	0	0	0	0	1
	20	Gelada-30	chr5:66801860+66802033	chr5:72946643+72946816	72946739	LIV5	L142			38168	1			0	0	0	0	0	0	0	0	0	0	0	0	0
	21	Gelada-31	chr5:68352802+68353339	chr5:74449777+74449988	74449915	16098	28697	28755		38168	0			1	1	1	1	1	1	1	1	1	1	1	1	1
	22	Gelada-32	chr5:71507242+71507477	chr5:77595086+77595323	77595235	34449	34474			38168	0			0	0	0	0	0	0	0	0	0	0	1	0	1
	23	Gelada-33	chr5:110955165+110955390	chr5:89625134+89625372	89625275	28547	97074	34449	34474	38168	0			0	0	0	0	0	0	0	0	0	0	0	0	0
	24	Gelada-34	chr5:110955165+110955390	chr5:119138837+119139062	119138946	16066	16098	28697	28755	38168	1			0	0	0	0	0	0	1	1	1	1	0	0	1
	25	Gelada-35	chr5:149471248+149471430	chr5:160041230+160041413	160041303	28547	30388	97074		38168	0			0	0	0	0	1	1	0	0	0	0	0	0	1
	26	Gelada-36	chr5:173544778+173544999	chr5:184884389+184884610	184884527	28547	LIV5	97124	34449	38168	0			0	0	0	0	1	1	0	0	0	0	0	0	1
	27	Gelada-37	chr6:74523744+74523985	chr6:77237181+77237423	77237261	97124	97074			38168	1			0	0	-9	1	0	0	0	0	0	0	0	0	1
	28	Gelada-38	chr6:87445262+87445510	chr6:90381839+90382087	90382001	28697	28547	L142		38168	0			0	0	0	0	0	0	0	0	0	0	0	0	0
	29	Gelada-39	chr6:114905897+114906281	chr6:118749056+118749439	118749191	16066	16098	34449	34474	38168	0			0	0	0	0	0	0	0	0	0	0	0	0	0
	30	Gelada-41	chr7:13541390+13541619	chr7:15345603+15345832	15345734	28697	28755			38168	1			0	0	0	0	0	0	0	0	1	1	0	0	1
	31	Gelada-42	chr7:56486341-56486574	chr7:59644438+59644671	59644557	28547	30388	L142		38168	1			0	0	0	0	0	0	0	0	0	0	0	0	0
	32	Gelada-43	chr7:78126939+78127494	chr7:82790517+82790764	82790651	16098	28697	34449		38168	1			1	1	1	1	1	1	1	1	1	1	1	1	1
	33	Gelada-44	chr7:145536553+145536747	chr7:151571711+151571905	151571814	16066	16098	28697		38168	0			0	0	0	0	0	0	1	1	0	0	0	0	1
	34	Gelada-48	chr8:10821220+10821430	chr8:11937903+11938113	11938022	16066	16098	28697		38168	1			0	0	0	0	0	0	1	1	0	0	0	0	1
	35	Gelada-49	chr8:23654405+23654595	chr8:25650772+25650966	25650857	16066	16098	L142	34474	38168	1			0	1	0	0	0	0	1	1	0	0	1	0	1
	36	Gelada-50	chr8:49047757-49047951	chr8:48509746+48509937	48509846	97124	97074			38168	0			0	0	0	1	0	0	0	0	0	0	0	0	1
	37	Gelada-51	chr9:440030+440231	chr9:409745+409946	409853	LIV5	34449	34474		38168	0			0	0	0	0	0	0	0	0	0	0	0	0	0
	38	Gelada-52	chr9:14326574-14326816	chr9:14221306+14221552	14221465	28547	30388	34449		38168	1			0	0	0	0	0	0	0	0	0	0	0	0	0
	39	Gelada-54	chr9:46165406+46165632	chr9:48591869+48592095	48591940	16066	34474			38168	1			0	0	0	0	0	0	1	0	0	0	1	0	1
	40	Gelada-55	chr9:55492928+55493443	chr9:58128542+58128748	58128655	LIV5	97074	34449	34474	38168	0			1	1	1	1	1	1	1	1	1	1	1	1	1
	41	Gelada-56	chr9:82396559+82396789	chr9:85544907+85545137	85544984	34449	34474			38168	1			0	0	0	0	0	0	0	0	0	0	0	0	0
	42	Gelada-57	chr9:113455544+113455756	chr9:117885574+117885786	117885702	16066	16098	28697		38168	1			0	0	0	0	0	0	1	1	0	0	0	0	1
	43	Gelada-58	chr10:30626612+30627160	chr10:30568011+30568240	30568160	28547	30388	LIV5	L142	38168	0			1	1	1	0	1	1	0	0	0	0	0	0	1
	44	Gelada-60	chr11:10292466+10292682	chr11:10908561+10908777	10908651	34449	34474			38168	1			0	0	0	0	0	0	0	0	0	0	1	1	1
	45	Gelada-61	chr11:56094650-56094825	chr11:59420935+59421115	59421024	16066	30388	97074	34474	38168	1			0	0	0	0	0	0	0	0	0	0	0	0	0
	46	Gelada-62	chr11:61792034+61792283	chr11:65140220+65140469	65140394	LIV5	97124	34449	34474	38168	0			0	0	0	0	0	0	0	0	0	0	0	0	0
	47	Gelada-63	chr11:103473622+103473808	chr11:104160856+104161042	104160936	LIV5	L142	34449	34474	38168	1			0	-9	1	0	0	0	1	0	0	0	1	0	1
	48	Gelada-64	chr11:103502270-103502777	chr11:104189538+104189737	104189632	16066	LIV5	L142		38168	0			1	1	1	0	0	0	1	0	0	0	1	1	1
	49	Gelada-66	chr12:2733153+2733372	chr12:26741530+26741749	26741671	28547	30388	LIV5		38168	0			0	0	0	0	1	1	0	0	0	0	0	0	1
	50	Gelada-69	chr13:87029451-87029684	chr13:90492588+90492821	90492681	97124	97074			38168	0			0	0	0	-9	0	0	0	0	0	0	0	0	0
	51	Gelada-70	chr13:104847862-104848107	chr13:91308262+91308507	91308408	97124	97074	34449	34474	38168	0			0	0	0	-9	0	0	0	0	0	0	0	0	-9
	52	Gelada-71	chr14:107953391+107953625	chr14:111460108+111460342	111460220	16098	34449	34474		38168	1			0	0	0	0	0	0	0	1	0	0	1	1	1
	53	Gelada-72	chr15:62499937-62500472	chr15:71608851+71609084	71608976	28697	28755	34474		38168	0			1	1	1	1	0	0	0	0	1	1	1	1	1
	54	Gelada-73	chr15:87638551+87638785	chr15:97315088+97315322	97315211	34449	34474			38168	0			0	0	0	0	0	0	0	0	0	0	0	0	0
	55	Gelada-74	chr15:90736946+90737114	chr15:100438760+100438928	100438839	97124	34449			38168	0			0	0	0	0	0	0	0	0	0	0	0	0	0
	56	Gelada-75	chr15:91254145+91254391	chr15:100958630+100958864	100958749	30388	97074			38168	1			0	0	0	0	0	0	0	0	0	0	0	0	0
	57	Gelada-76	chr15:106607732+106607936	chr15:111269052+111269262	111269156	97124	97074			38168	1			0	0	0	1	0	0	0	0	0	0	0	0	1
	58	Gelada-77	chr16:43747605+43748160	chr16:43113322+43113562	43113394	28697	97124	97074	34474	38168	0			1	1	1	1	1	1	1	1	1	1	1	1	1
	59	Gelada-78	chr16:60837018+60837240	chr16:62805999+62806221	62806077	16098	28697			38168	1			0	0	0	0	0	0	0	1	0	0	0	0	1
	60	Gelada-79	chr17:689513-689743	chr17:965364+965594	965456	16066	28697	34449	34474	38168	0			0	0	0	0	0	0	1	0	1	0	1	1	1
	61	Gelada-80	chr17:7550812-7551032	chr17:7796210+7796430	7796353	34449	34474			38168	0			0	0	0	0	0	0	0	0	0	0	1	1	1
	62	Gelada-81	chr17:62686600+62686831	chr17:44693788+44694008	44693872	28547	30388			38168	0			0	0	0	0	1	1	0	0	0	0	0	0	1
	63	Gelada-82	chr17:75803257+75803487	chr17:66715058+66715289	66715197	28547	34449	34474		38168	1			0	0	0	1	1	1	0	0	0	0	1	0	-9
	64	Gelada-83	chr17:87534113+87534332	chr17:80140963+80141193	80141047	16066	16098	28697	97074	38168	0			0	0	0	0	0	0	1	0	0	0	0	0	1
	65	Gelada-84	chr17:87534113+87534332	chr17:92212982+92213201	92213087	L142	97124	97074		38168	0			0	1	0	1	0	0	0	0	0	0	0	0	1
	66	Gelada-85	chr18:11202906-11203109	chr18:7473447+7473650	7473576	28697	28755	34474		38168	0			0	0	0	0	0	0	0	0	1	1	1	1	1
	67	Gelada-86	chr18:22979758-22979946	chr18:19542505+19542693	19542620	28697	L142	34449		38168	1			0	1	0	0	0	0	0	0	1	0	0	1	1
	68	Gelada-87	chr18:71501978+71502506	chr18:69581999+69582211	69582104	30388	LIV5	L142	34449	38168	0			1	1	1	0	1	1	0	0	0	0	1	0	1
	69	Gelada-88	chr19:5648639+5648882	chr19:6033028+6033271	6033157	16098	34449	34474		38168	1			0	0	0	1	0	0	0	1	0	0	1	1	1
	70	Gelada-90	chr19:19324068-19324596	chr19:21126944+21127156	21127042	L142	97124	97074	34474	38168	0			1	1	0	1	0	0	0	0	0	0	0	0	1
	71	Gelada-96	chr20:3026104-3026659	chr20:3715344+3715583	3715426	34449	34474			38168	1			1	1	1	1	1	1	1	1	1	1	1	1	1
	72	Gelada-97	chr1:30701070+30701279	chr1:27399260+27399469	27399364	L142	97124			38168	1			0	1	1	1	0	0	0	0	0	0	0	0	1
	73	Gelada-98	chr1:64319740-64319965	chr1:61913712+61913937	61913864	16098	28697	28755		38168	0			0	0	0	0	0	0	0	0	1	1	0	0	1
	74	Gelada-99	chr1:100399774+100400010	chr1:100178625+100178852	100178744	16066	28697	97074		38168	1			0	0	0	0	0	0	0	0	0	0	0	0	0
	75	Gelada-100	chr1:127123670+127123910	chr1:127893256+127893496	127893349	97124	97074	34449		38168	0			0	0	1	0	0	0	0	0	0	0	0	0	1
	76	Gelada-101	chr1:134714374+134714920	chr1:135538433+135538659	135538510	LIV5	L142			38168	1			1	1	1	0	0	0	0	0	0	0	0	0	0
	77	Gelada-102	chr1:134793314-134793559	chr1:135617054+135617299	135617149	16098	28697	28755		38168	1			0	0	0	0	0	0	0	1	1	1	0	0	0
	78	Gelada-104	chr1:197837437-197837635	chr1:192329284+192329482	192329408	16066	34449			38168	1			0	0	0	0	0	0	1	0	0	0	0	0	0
	79	Gelada-106	chr3:3689040+3689275	chr3:3759371+3759605	3759525	28547	97124	97074		38168	1			0	0	0	1	1	0	0	0	0	0	0	0	1
	80	Gelada-107	chr5:11493377+11493626	chr5:16059448+16059697	16059570	LIV5	97124	97074		38168	1			0	0	1	1	0	0	0	0	0	0	0	0	1
	81	Gelada-108	chr5:22468799+22469031	chr5:27122257+27122489	27122414	28697	28755	34474		38168	1			0	0	0	0	0	0	0	0	1	1	1	0	1
	82	Gelada-109	chr5:78536066+78536309	chr5:85358644+85358886	85358734	LIV5	34449			38168	0			0	0	0	0	0	0	0	0	0	0	0	0	0
	83	Gelada-111	chr7:41530000+41530219	chr7:43974860+43975083	43974940	16066	16098	97074		38168	0			0	0	0	0	0	0	1	1	0	0	0	0	1
	84	Gelada-114	chr7:101996500+101996748	chr7:107357740+107357988	107357864	97124	97074			38168	1			0	0	0	1	0	0	1	0	0	0	0	0	1
	85	Gelada-115	chr8:47091488-47091733	chr8:50660587+50660832	50660730	16066	34449			38168	1			0	0	0	0	0	0	0	0	0	0	0	0	1
	86	Gelada-116	chr8:119368195+119368701	chr8:123554463+123554665	123554541	LIV5	L142	97124		38168	1			1	1	1	1	0	0	0	0	0	0	0	0	1
	87	Gelada-117	chr8:120961447-120961651	chr8:125209187+125209391	125209270	28547	30388			38168	0			0	0	0	0	1	1	0	0	0	0	0	0	1
	88	Gelada-119	chr10:38205297+38205533	chr10:38294298+38294534	38294423	28697	28755	34449		38168	0			0	0	0	0	0	0	0	0	1	1	0	1	1
	89	Gelada-121	chr11:20899496+20899734	chr11:22309933+22310168	22310095	97124	97074			38168	0			0	0	0	1	0	0	0	0	0	0	0	0	1
	90	Gelada-122	chr11:88945022+88945257	chr11:89062323+89062558	89062457	LIV5	L142	97074		38168	0			1	1	1	0	0	0	0	0	0	0	0	0	1
	91	Gelada-124	chr17:12435391+12435598	chr17:13087638+13087840	13087709	28697	28755	34474		38168	1			0	0	0	0	0	0	0	1	1	1	1	1	1
	92	Gelada-125	chr18:58017047+58017236	chr18:55382512+55382701	55382622	28547	LIV5			38168	0			0	0	0	0	0	0	0	0	0	0	0	0	0
	93	Gelada-126	chr18:70523250-70523455	chr18:68400001+68400206	68400107	16066	34449	34474		38168	0			0	0	0	0	0	0	1	0	0	0	1	1	1
	94	Gelada-127	chr19:4213212-4213743	chr19:4525745+4525947	4525869	28547	34449	34474		38168	0			1	1	1	1	1	1	1	1	1	1	1	1	1
	95	Gelada-130	chr19:31593506+31593724	chr19:33060210+33060428	33060349	LIV5	97124	97074		38168	1			0	0	1	1	0	0	0	0	0	0	0	1	1
	96	Gelada-131	chr20:16974786+16974991	chr20:17940082+17940287	17940195	28697	97124	34449		38168	1			0	0	0	0	0	0	0	0	0	0	0	0	0
						We do not have DNA for this individual									This individual was not considered in the analyses due to lack of WGS
						Prediction was PCR validated; 71%									Prediction was PCR validated; 71%
						False positive; prediction was not confirmed by PCR; 29%									False positive; prediction was shown by PCR to be a false detection; 29%
															False negative; predicted to be not shared but PCR indicated insertion present
		Alu			Predicted insertion
	#	Locus ID	[Panu_2.0] coordinates	In silico in [Mmul8.0.1]	coordinate [Mmul8.0.1]	Predicted shared in these ID #'s							38168	27861	L142	LIV5	97124	28547	30388	16066	16098	28697	28755	34474	34472	KB10538
	97	Anu-17	chr5:147574864+147575250	chr5:158053223+158053613	Chr5:158053428	L142	LIV5		38168	KB10538				0	0	0	0	0	0	0	0	0	0	0	0	0
	98	Anu-12	chr4:63767608+63767916	chr4:66040865+66041173	Chr4:66041050	L142	LIV5		38168	KB10538				0	1	1	0	0	0	0	0	0	0	0	0	1
	99	Anu-20	chr6:118238779+118239022	chr6:121829472+121829715	Chr6:121829604	L142	LIV5		38168	KB10538				0	0	0	0	0	0	0	0	0	0	0	0	0
	100	Anu-28	chr14:118144847+118145062	chr14:121976003+121976218	Chr14:121976117	L142	LIV5		38168	KB10538				0	1	1	0	0	0	0	0	0	0	0	0	1
	101	Anu-6	chr3:114695395+114695644	chr3:106817181+106817430	Chr3:106817315	L142	LIV5		38168	KB10538				0	1	1	0	0	0	0	0	0	0	0	0	1
	102	Ham-73	chr12:40789881+40790365	chr12:65966502+65966986	Chr12:65966678	97124	97074		38168	KB10538				0	0	0	1	0	0	0	0	0	0	0	0	1
	103	Ham-59	chr11:10108169+10108566	chr11:10553012+10553409	Chr11:10553179	97124	97074		38168	KB10538				0	0	0	1	0	0	0	0	0	0	0	0	1
	104	Ham-76	chr13:73817322+73817701	chr13:75970969+75971348	Chr13:75971083	97124	97074		38168	KB10538				0	0	0	1	0	0	0	0	0	0	0	0	1
	105	Ham-99	chr19:50877638-50877861	chr19:51161343+51161566	Chr19:51161472	97124	97074		38168	KB10538				0	0	0	0	0	0	0	0	0	0	0	0	0
	106	Ham-52	chr8:49047599-49047961	chr8:48509736+48510094	Chr8:48509846	97124	97074		38168	KB10538				0	0	0	1	0	0	0	0	0	0	0	0	1
	107	Ham-25	chr3:72943906+72944104	chr3:70531656+70531854	Chr3:70531752	97124	97074		38168	KB10538				0	0	0	1	0	0	0	0	0	0	0	0	1
	108	Ham-98	chr19:46520679+46520938	chr19:48872247+48872503	Chr19:48872349	97124	97074		38168	KB10538				0	0	0	1	0	0	0	0	0	0	0	1	1
	109	Ham-101	chr20:68545223+68545620	chr20:71586019+71586416	Chr20:71586173	97124	97074		38168	KB10538				0	0	0	1	0	0	0	0	0	0	0	0	1
	110	Ham-1	chr1:20833085+20833334	chr1:17298514+17298763	Chr1:17298665	97124	97074		38168	KB10538				0	0	0	1	0	0	0	0	0	0	0	0	1
	111	Papio-38	chr11:53315416+53315714	chr11:56537855+56538154	Chr11:56537958	28547	30388		38168	KB10538				0	0	0	0	1	1	0	0	0	0	0	0	1
	112	Papio-43	chr13:97932254+97932490	chr13:101930032+101930269	Chr13:101930134	28547	30388		38168	KB10538				0	0	0	0	1	0	0	0	0	0	0	0	1
	113	Papio-48	chr14:39067057+39067440	chr14:40191555+40191938	Chr14:40191827	28547	30388		38168	KB10538				0	0	0	0	0	0	0	0	0	0	0	0	0
	114	Papio-33	chr9:77732859+77733240	chr9:80767768+80768150	Chr9:80768028	28547	30388		38168	KB10538				0	0	0	0	0	0	0	0	0	0	0	0	1
	115	Papio-17	chr6:34509358+34509757	chr6:35446855+35447253	Chr6:35447019	28547	30388		38168	KB10538				0	0	0	0	0	0	0	0	0	-9	0	0	0
	116	Yel-14	chr8:28246374+28246667	chr8:30235040+30235333	Chr8:30235198	16066	16098		38168	KB10538				0	0	0	0	0	0	1	1	0	0	0	1	1
	117	Yel-26	chr20:26553953+26554244	chr20:27590539+27590835	Chr20:27590704	16066	16098		38168	KB10538				0	0	0	0	0	0	0	0	0	0	0	0	0
	118	Yel-4	chr3:61897190+61897437	chr3:59354871+59355118	Chr3:59354983	16066	16098		38168	KB10538				0	0	0	0	0	0	1	1	0	0	0	0	1
	119	Yel-6	chr4:24579763+24580062	chr4:25189548+25189843	Chr4:25189649	16066	16098		38168	KB10538				0	0	0	0	0	0	1	1	0	0	1	0	0
	120	Yel-9	chr5:34498407+34498706	chr5:39491771+39492066	Chr5:39491870	16066	16098		38168	KB10538				0	0	0	0	0	0	0	-9	0	0	0	0	1
	121	Yel-11	chr6:69144688+69144987	chr6:71736807+71737105	Chr6:71736949	16066	16098		38168	KB10538				0	0	0	0	0	0	1	1	0	0	0	0	1
	122	Cha-10	chr2:48875647+48876036	chr2:54936704+54937096	Chr2:54936995	28697	28755		38168	KB10538				0	0	0	0	0	0	0	0	1	1	0	0	0
	123	Cha-47	chr15:40248534+40248810	chr15:48493041+48493317	Chr15:48493179	28697	28755		38168	KB10538				0	0	0	0	0	0	0	0	1	1	0	0	0
	124	Cha-33	chr10:2393256+2393553	chr10:2459632+2459929	Chr10:2459762	28697	28755		38168	KB10538				0	0	0	0	0	0	0	0	1	1	0	0	1
	125	Cha-14	chr3:48670926-48671245	chr3:46334963+46335282	Chr3:46335129	28697	28755		38168	KB10538				0	0	0	0	0	0	0	0	-9	-9	0	0	0
	126	Cha-7	chr1:212872628-212872877	chr1:212528357+212528610	Chr1:212528473	28697	28755		38168	KB10538				0	0	0	0	0	0	0	0	0	0	0	0	0
	127	Cha-15	chr3:127744877+127745256	chr3:130922143+130922522	Chr3:130922256	28697	28755		38168	KB10538				0	0	0	0	0	0	0	0	1	1	0	0	1
	128	Cha-43	chr13:100660075+100660526	chr13:105026353+105026808	Chr13:105026542	28697	28755		38168	KB10538				0	0	0	0	0	0	0	0	1	1	0	0	1
	129	Kinda-49	chr4:24336750+24337043	chr4:24943027+24943321	Chr4:24943146	34474	34449		38168	KB10538				0	0	0	0	0	0	0	0	0	0	0	0	0
	130	Kinda-196	chr16:63867621+63868013	chr16:65998081+65998473	Chr16:65998290	34474	34449		38168	KB10538				0	0	0	0	0	0	0	0	0	0	0	0	0
	131	Kinda-122	chr9:110411173+110411683	chr9:114750831+114751404	Chr9:114750927	34474	34449		38168	KB10538				0	0	0	0	0	0	0	0	0	0	0	0	0
	132	Kinda-145	chr12:32652420+32652814	chr12:57734736+57735130	Chr12:57734910	34474	34449		38168	KB10538				0	0	0	0	0	0	0	0	0	0	1	1	0
	133	Kinda-222	chr19:27518057+27518547	chr19:28736030-28736521	Chr19:28736420	34474	34449		38168	KB10538				-9	-9	-9	-9	-9	-9	-9	-9	-9	-9	-9	-9	-9
	134	Kinda-9	chr1:72167703+72168071	chr1:69887064+69887430	Chr1:69887241	34474	34449		38168	KB10538				0	0	0	0	0	0	0	0	0	0	0	0	0
	135	Kinda-184	chr15:76649074+76649321	chr15:86044085+86044334	Chr15:86044188	34474	34449		38168	KB10538				0	0	0	0	0	0	0	0	0	0	0	0	0
	136	Kinda-109	chr8:139132461+139132959	chr8:143835560+143836057	Chr8:143835717	34474	34449		38168	KB10538				0	0	0	0	0	0	0	0	0	0	0	0	-9
	137	Kinda-92	chr7:24898517+24898760	chr7:26987234+26987477	Chr7:26987335	34474	34449		38168	KB10538				0	0	0	0	0	0	0	0	0	0	0	0	0
	138	Kinda-236	chr20:68437044+68437484	chr20:68437044+68437484	Chr20:71475255	34474	34449		38168	KB10538				-9	-9	-9	-9	-9	-9	-9	-9	-9	-9	-9	-9	-9
	139	Kinda-135	chr11:56128517+56129073	chr11:59464954+59465502	Chr11:59465063	34474	34449		38168	KB10538				0	0	0	0	0	0	0	0	0	0	0	0	0
	140	Kinda-44	chr3:148387711+148388267	chr3:152633072+152633628	Chr3:152633341	34474	34449		38168	KB10538				0	0	0	0	0	0	0	0	0	0	0	0	0
	141	Kinda-53	chr4:32909016+32909233	chr4:34515558+34515778	Chr4:34515683	34474	34449		38168	KB10538				0	0	0	0	0	0	0	0	0	0	1	0	1
	142	Kinda-27	chr2:98251587+98252173	chr2:105637599+105638186	Chr2:105637867	34474	34449		38168	KB10538				0	0	0	0	0	0	0	0	0	0	0	0	0
	143	Kinda-180	chr15:27215978+27216219	chr15:31982039+31982280	Chr15:31982164	34474	34449		38168	KB10538				0	0	0	0	0	0	0	0	0	0	0	0	-9
	144	Kinda-213	chr19:2805676+2806199	chr19:2954518+2955031	Chr19:2954909	34474	34449		38168	KB10538				0	1	0	0	0	0	0	1	0	0	0	1	0
	145	Kinda-166	chr14:46914402+46914860	chr14:48313662+48314122	Chr14:48313997	34474	34449		38168	KB10538				0	0	0	0	0	0	0	0	0	0	0	0	0
	146	Kinda-70	chr5:71507224+71507490	chr5:77595068+77595336	Chr5:77595235	34474	34449		38168	KB10538				0	0	0	0	0	0	0	0	0	0	1	0	1
	147	Kinda-199	chr16:68041519+68041747	chr16:70388643+70388871	Chr16:70388780	34474	34449		38168	KB10538				0	0	0	0	0	0	0	0	0	0	1	1	1
	148	Kinda-173	chr14:108349620+108350202	chr14:111874264+111874847	Chr14:111874751	34474	34449		38168	KB10538				0	0	0	0	0	0	1	0	0	0	0	1	1
		Alu			Predicted insertion	Ascertained from WGS: T. gelada: 38168					After 30bp filter on reads
		Locus ID	[Panu_2.0] coordinates	In silico in [Mmul8.0.1]	coordinate [Mmul8.0.1]	Predicted shared in these ID #'s
	1	Gelada-7	chr2:10763215+10763444	chr2:11536518+11536747	11536588	16066	28547	34449	34474		locus filtered out
	2	Gelada-9	chr2:140997955+140998155	chr2:156681652+156681852	156681747	34449	34474				still predicted in these 2
	3	Gelada-16	chr3:63935451+63935670	chr3:61486404+61486623	61486515	LIV5	L142	34449			locus filtered out
	4	Gelada-25	chr4:61986337+61986537	chr4:64126618+64126818	64126727	16098	28697				still predicted in these 2
	5	Gelada-30	chr5:66801860+66802033	chr5:72946643+72946816	72946739	LIV5	L142				locus filtered out
	6	Gelada-33	chr5:110955165+110955390	chr5:89625134+89625372	89625275	28547	97074	34449	34474		locus filtered out
	7	Gelada-38	chr6:87445262+87445510	chr6:90381839+90382087	90382001	28697	28547	L142			locus filtered out
	8	Gelada-39	chr6:114905897+114906281	chr6:118749056+118749439	118749191	16066	16098	34449	34474		locus filtered out
	9	Gelada-42	chr7:56486341-56486574	chr7:59644438+59644671	59644557	28547	30388	L142			stilll predicted in 28547 and 30388
	10	Gelada-51	chr9:440030+440231	chr9:409745+409946	409853	LIV5	34449	34474			still predicted in 34474
	11	Gelada-52	chr9:14326574-14326816	chr9:14221306+14221552	14221465	28547	30388	34449			locus filtered out
	12	Gelada-56	chr9:82396559+82396789	chr9:85544907+85545137	85544984	34449	34474				locus filtered out
	13	Gelada-61	chr11:56094650-56094825	chr11:59420935+59421115	59421024	16066	30388	97074	34474		locus filtered out
	14	Gelada-62	chr11:61792034+61792283	chr11:65140220+65140469	65140394	LIV5	97124	34449	34474		locus filtered out
	15	Gelada-73	chr15:87638551+87638785	chr15:97315088+97315322	97315211	34449	34474				locus filtered out
	16	Gelada-74	chr15:90736946+90737114	chr15:100438760+100438928	100438839	97124	34449				locus filtered out
	17	Gelada-75	chr15:91254145+91254391	chr15:100958630+100958864	100958749	30388	97074				locus filtered out
	18	Gelada-99	chr1:100399774+100400010	chr1:100178625+100178852	100178744	16066	28697	97074			locus filtered out
	19	Gelada-109	chr5:78536066+78536309	chr5:85358644+85358886	85358734	LIV5	34449				locus filtered out
	20	Gelada-115	chr8:47091488-47091733	chr8:50660587+50660832	50660730	16066	34449				still predicted in these 2
	21	Gelada-125	chr18:58017047+58017236	chr18:55382512+55382701	55382622	28547	LIV5				locus filtered out
	22	Gelada-131	chr20:16974786+16974991	chr20:17940082+17940287	17940195	28697	97124	34449			still predicted in these 3
							43 false predictions
		Gelada-23	chr4:48491501+48491739	chr4:50305554+50305792	50305689	16066	16098	28697			still predicted in all these
		Gelada-26	chr4:62044686-62044966	chr4:64186171+64186451	64186335	16098	28697	34449	34474		28697 and 16098 filtered out
		Gelada-36	chr5:173544778+173544999	chr5:184884389+184884610	184884527	28547	LIV5	97124	34449		still predicted in all these
		Gelada-44	chr7:145536553+145536747	chr7:151571711+151571905	151571814	16066	16098	28697			still predicted in all these
		Gelada-48	chr8:10821220+10821430	chr8:11937903+11938113	11938022	16066	16098	28697			still predicted in all these
		Gelada-57	chr9:113455544+113455756	chr9:117885574+117885786	117885702	16066	16098	28697			still predicted in all these
		Gelada-66	chr12:2733153+2733372	chr12:26741530+26741749	26741671	28547	30388	LIV5			LIV5 fillered out; others remain
		Gelada-70	chr13:104847862-104848107	chr13:91308262+91308507	91308408	97124	97074	34449	34474		still predicted in all these
		Gelada-78	chr16:60837018+60837240	chr16:62805999+62806221	62806077	16098	28697				still predicted in all these
		Gelada-83	chr17:87534113+87534332	chr17:80140963+80141193	80141047	16066	16098	28697	97074		still predicted in all these
		Gelada-90	chr19:19324068-19324596	chr19:21126944+21127156	21127042	L142	97124	97074	34474		still predicted in all these
		Gelada-98	chr1:64319740-64319965	chr1:61913712+61913937	61913864	16098	28697	28755			still predicted in all these
		Gelada-100	chr1:127123670+127123910	chr1:127893256+127893496	127893349	97124	97074	34449			still predicted in all these
