# Supplementary material for: Alu insertion polymorphisms shared by Papio baboons and Theropithecus gelada reveal an intertwined common ancestry
Source: Mob DNA. 2019 Nov 26;10:46. doi: 10.1186/s13100-019-0187-y (PMC6880559; doi:10.1186/s13100-019-0187-y)
Supplement: Supplementary file 4 — Additional file 4. An Excel file with a list of the 27,700 T. gelada / Papio shared Alu insertions. (XLSX 1.7MB) [file 13100_2019_187_MOESM4_ESM.xlsx]

## Sheet: SupFile-S5-gelada shared
1	41684	16066	16098	28697	28755	28547	30388	LIV5	L142	97124	97074	34449	34474	38168	0
1	70216	16066	16098	28697	28755	28547	30388	LIV5	L142	97124	97074	34449	34474	38168	0
1	169382	16066	16098	28697	28755	28547	30388	LIV5	L142	97124	97074	34449	34474	38168	1
1	201437	28697	97124	34449	38168	1
1	225608	16066	16098	28697	28755	28547	30388	LIV5	L142	97124	97074	34449	34474	38168	1
1	284840	16066	28697	28755	28547	30388	LIV5	L142	97124	97074	34449	34474	38168	0
1	290294	LIV5	34449	38168	1
1	359301	28547	30388	38168	0
1	377668	16066	16098	28697	28755	28547	30388	LIV5	L142	97124	97074	34449	34474	38168	0
1	485551	16066	16098	28697	28755	28547	30388	LIV5	L142	97124	97074	34449	34474	38168	0
1	530102	16066	28755	28547	30388	LIV5	L142	97124	97074	34449	34474	38168	1
1	705856	16098	28547	30388	97124	97074	34449	38168	1
1	784019	LIV5	L142	97124	38168	1
1	813884	16066	16098	28697	28755	28547	30388	LIV5	L142	97124	97074	34449	34474	38168	1
1	823344	16066	16098	28697	28755	28547	30388	LIV5	L142	97124	97074	34449	34474	38168	0
1	831923	16066	16098	28697	28755	28547	30388	LIV5	L142	97124	97074	34449	34474	38168	1
1	844015	16066	16098	28697	28755	28547	30388	LIV5	L142	97124	97074	34449	34474	38168	0
1	862888	16098	28547	30388	LIV5	L142	97124	97074	34449	34474	38168	0
1	908050	16066	16098	28697	28755	28547	30388	LIV5	L142	97124	97074	34449	34474	38168	0
1	913118	16066	16098	28697	28755	28547	30388	LIV5	L142	97124	97074	34449	34474	38168	0
1	939405	16066	16098	28697	28755	LIV5	L142	97124	97074	34449	34474	38168	0
1	1023921	28697	28755	28547	30388	LIV5	L142	34449	34474	38168	0
1	1083772	16066	16098	28697	28755	28547	30388	LIV5	L142	97124	97074	34449	34474	38168	0
1	1101507	16066	16098	28697	28755	30388	LIV5	97124	34449	34474	38168	1
1	1153988	16066	16098	28697	28755	28547	30388	LIV5	L142	97124	97074	34449	34474	38168	1
1	1198195	16098	28697	LIV5	L142	97124	34449	38168	1
1	1244049	16066	16098	28547	30388	LIV5	L142	97124	97074	34449	34474	38168	1
1	1252829	16066	28755	28547	30388	L142	97074	34449	34474	38168	1
1	1270717	16066	16098	28697	28755	28547	30388	LIV5	L142	97124	97074	34449	34474	38168	0
1	2303676	16066	16098	28697	28755	28547	30388	LIV5	L142	97124	97074	34449	34474	38168	0
1	2441556	16066	16098	28697	28755	28547	30388	LIV5	L142	97124	97074	34449	34474	38168	1
1	2715984	16066	16098	28697	28755	28547	30388	LIV5	L142	97124	97074	34449	34474	38168	0
1	2799003	16066	16098	28697	28755	28547	30388	LIV5	L142	97124	97074	34449	34474	38168	1
1	2805662	28755	LIV5	L142	97124	97074	34449	34474	38168	1
1	2820480	16066	16098	28697	28755	28547	30388	LIV5	L142	97124	97074	34449	34474	38168	0
1	2830857	16066	16098	28697	28755	28547	30388	LIV5	L142	97124	97074	34449	34474	38168	1
1	2833146	16066	16098	28697	28755	28547	30388	LIV5	L142	97124	34449	34474	38168	0
1	3143879	16066	16098	28697	28755	28547	30388	LIV5	L142	97124	97074	34449	38168	0
1	3161702	16066	16098	28697	28755	28547	30388	LIV5	L142	97124	97074	34449	34474	38168	1
1	3164055	16066	16098	28697	28755	28547	30388	LIV5	L142	97124	97074	34449	34474	38168	1
1	3313739	16066	16098	28697	28755	28547	30388	LIV5	L142	97124	97074	34449	34474	38168	0
1	3524468	16066	16098	28697	28755	28547	30388	LIV5	L142	97124	97074	34449	34474	38168	1
1	3811252	16066	16098	28697	28755	28547	30388	LIV5	L142	97124	97074	34449	34474	38168	0
1	4136327	16066	16098	28697	28755	28547	30388	LIV5	L142	97124	97074	34449	34474	38168	0
1	4242348	28755	28547	30388	LIV5	L142	97124	97074	34449	34474	38168	0
1	4399569	16066	16098	28697	28755	28547	30388	LIV5	L142	97124	97074	34449	34474	38168	0
1	4420455	16066	16098	28755	28547	30388	LIV5	L142	97124	97074	34449	34474	38168	1
1	4422777	16066	16098	28697	28755	28547	30388	LIV5	L142	97124	97074	34449	34474	38168	1
1	4902589	16066	16098	28697	28547	30388	LIV5	L142	97124	97074	34449	34474	38168	0
1	4985938	16066	16098	28697	28755	28547	30388	LIV5	L142	97124	97074	34449	34474	38168	1
1	5075768	16098	28697	28755	28547	30388	LIV5	L142	97124	97074	34449	34474	38168	1
1	5192830	16066	16098	28755	28547	30388	LIV5	L142	97124	97074	34449	34474	38168	0
1	5219800	16066	16098	28697	28755	28547	30388	LIV5	L142	97124	97074	34449	34474	38168	0
1	5364750	16066	16098	28697	28755	28547	30388	LIV5	L142	97124	97074	34449	34474	38168	0
1	5385561	16066	16098	28697	28755	28547	30388	LIV5	L142	97074	34449	34474	38168	1
1	5448328	16066	16098	28697	28755	28547	30388	LIV5	L142	97124	97074	34449	34474	38168	0
1	5494909	16066	16098	28697	28755	28547	30388	LIV5	L142	97124	97074	34449	34474	38168	0
1	5547959	16066	16098	28697	28755	28547	30388	LIV5	L142	97124	97074	34449	34474	38168	0
1	5548689	16098	28755	28547	30388	LIV5	L142	97124	97074	34449	34474	38168	0
1	5576593	16066	16098	28697	28755	28547	30388	LIV5	L142	97124	97074	34449	34474	38168	1
1	5599793	28547	30388	97074	34474	38168	0
1	5803587	28697	28755	28547	LIV5	L142	97074	34449	34474	38168	1
1	5814752	16066	16098	28697	28755	28547	30388	LIV5	L142	97124	97074	34449	34474	38168	1
1	5820173	16066	16098	28697	28755	28547	30388	LIV5	L142	97124	97074	34449	34474	38168	0
1	5841225	16066	16098	28697	28755	28547	30388	LIV5	L142	97124	97074	34449	34474	38168	0
1	5857899	16066	16098	28697	28755	LIV5	97124	97074	34449	34474	38168	0
1	5858804	16066	28697	LIV5	97074	34474	38168	0
1	5922835	16066	16098	28697	28755	28547	30388	LIV5	L142	97124	97074	34449	34474	38168	0
1	6015362	16066	16098	28697	28755	28547	30388	LIV5	L142	97124	97074	34449	34474	38168	1
1	6264747	16066	16098	28547	30388	L142	97124	97074	34449	34474	38168	1
1	6358371	16066	16098	28547	30388	L142	97074	34449	34474	38168	0
1	6391172	16066	16098	28697	28755	28547	30388	LIV5	L142	97124	97074	34449	34474	38168	0
1	6416959	16066	16098	28697	28755	28547	30388	L142	97124	97074	34449	34474	38168	0
1	6768494	16066	16098	28697	28755	28547	30388	LIV5	L142	97124	97074	34449	34474	38168	0
1	6816464	16066	16098	28697	28755	28547	30388	LIV5	L142	97124	97074	34449	34474	38168	1
1	6874082	16066	28697	28755	28547	30388	LIV5	L142	97124	97074	34449	34474	38168	0
1	6957114	16066	16098	28697	28755	28547	30388	LIV5	L142	97124	97074	34449	34474	38168	1
1	6969400	16066	16098	28697	28755	28547	30388	LIV5	L142	97124	97074	34449	34474	38168	1
1	6992571	16066	16098	28697	28755	28547	30388	LIV5	L142	97124	97074	34449	34474	38168	0
1	7057230	16066	28697	28755	38168	0
1	7073692	16066	16098	28697	28755	28547	30388	LIV5	L142	97124	97074	34449	34474	38168	0
1	7129933	16066	16098	28697	28755	28547	30388	LIV5	L142	97124	97074	34449	34474	38168	1
1	7197493	16066	16098	28697	28755	LIV5	L142	97124	97074	34449	34474	38168	1
1	7207641	16066	16098	28697	28755	28547	30388	LIV5	L142	97124	97074	34449	34474	38168	0
1	7313864	16066	16098	28697	28755	28547	30388	LIV5	L142	L142	97124	97074	34449	34474	38168	0
1	7369339	16066	16098	28697	28755	28547	30388	LIV5	L142	97124	97074	34449	34474	38168	0
1	7522978	16066	16098	28697	28755	28547	30388	LIV5	L142	97124	97074	34449	34474	38168	1
1	7630258	16066	16098	28697	28755	28547	30388	LIV5	L142	97124	97074	34449	34474	38168	0
1	7644143	16066	16098	28697	28755	28547	30388	LIV5	L142	97124	97074	34449	34474	38168	0
1	7647413	16066	16098	28697	28755	28547	30388	LIV5	L142	97124	97074	34449	34474	38168	1
1	7760420	16066	16098	28697	28755	28547	30388	LIV5	L142	97124	97074	34449	34474	38168	0
1	7807789	16066	16098	28697	28755	28547	30388	LIV5	L142	97124	97074	34449	34474	38168	0
1	7899338	16066	16098	28697	28755	28547	30388	LIV5	L142	97124	97074	34449	34474	38168	0
1	7900892	16066	16098	28697	28755	28547	30388	LIV5	L142	97124	97074	34449	34474	38168	0
1	7936677	16066	16098	28697	28755	28547	30388	LIV5	L142	97074	34449	34474	38168	0
1	7978605	16066	16098	28697	28755	28547	30388	LIV5	L142	97124	97074	34449	34474	38168	1
1	7998377	28697	28755	28547	30388	L142	97124	97074	34449	34474	38168	1
1	8120251	16066	16098	28697	28755	28547	30388	LIV5	L142	97124	97074	34449	34474	38168	1
1	8126471	28697	28755	38168	0
1	8131681	16066	16098	28697	28755	28547	30388	LIV5	L142	97124	97074	34449	34474	38168	0
1	8229293	16066	16098	28697	28755	28547	30388	LIV5	L142	97124	97074	34449	34474	38168	1
1	8308668	16066	16098	28697	28755	28547	30388	LIV5	L142	97124	97074	34449	34474	38168	0
1	8383537	16066	34449	38168	1
1	8390714	16066	LIV5	34449	38168	1
1	8545717	16098	28697	28755	28547	30388	LIV5	L142	34449	34474	38168	1
1	8589909	16066	16098	28697	28755	28547	30388	LIV5	L142	97074	34474	38168	1
1	8649377	16098	30388	34449	38168	0
1	8775994	16066	16098	28697	28755	28547	30388	LIV5	97124	97074	34449	34474	38168	1
1	8792824	97124	34449	34474	38168	1
1	8806687	LIV5	L142	38168	1
1	8879129	16066	16098	28697	28755	28547	30388	LIV5	L142	97124	97074	34449	34474	38168	1
1	8883539	16066	16098	28697	28755	28547	30388	LIV5	L142	97124	97074	34449	34474	38168	0
1	8904978	16066	16098	28697	28755	28547	30388	LIV5	L142	97124	97074	34449	34474	38168	0
1	8919447	16066	16098	28697	28755	30388	LIV5	L142	97124	97074	34449	34474	38168	1
1	8945157	LIV5	L142	97124	97074	38168	0
1	8946044	16098	28697	28755	28547	30388	LIV5	L142	97124	97074	34449	34474	38168	0
1	8957644	16066	16098	28697	28755	28547	30388	LIV5	L142	97124	97074	34449	34474	38168	1
1	8969682	16098	28697	28547	30388	34449	34474	38168	0
1	9028740	16066	16098	28697	28755	28547	30388	LIV5	L142	97124	97074	34449	34474	38168	1
1	9052063	16066	16098	28697	28755	28547	30388	LIV5	L142	97124	97074	34449	34474	38168	1
1	9061587	16066	16098	28697	28755	28547	30388	LIV5	L142	97124	97074	34449	34474	38168	0
1	9088151	28697	28547	30388	LIV5	L142	97124	97074	34449	34474	38168	1
1	9096395	28697	28547	30388	L142	97124	34449	34474	38168	1
1	9185314	16066	16098	28697	28755	28547	30388	LIV5	L142	97124	97074	34449	34474	38168	1
1	9208032	16066	16098	28697	28755	28547	30388	LIV5	L142	34449	34474	38168	1
1	9209868	16066	28697	28755	28547	30388	LIV5	L142	34449	38168	1
1	9324746	16066	16098	28697	28755	28547	30388	LIV5	L142	97124	97074	34449	34474	38168	0
1	9351206	16066	16098	28697	28755	28547	30388	LIV5	L142	97124	97074	34449	34474	38168	0
1	9407533	16066	16098	28697	34449	38168	0
1	9417435	28755	28547	30388	34474	38168	0
1	9418132	16066	16098	28697	28755	28547	30388	LIV5	34474	38168	1
1	9454446	16066	16098	28697	28755	28547	30388	LIV5	L142	97124	97074	34449	34474	38168	1
1	9464879	16066	16098	28697	28755	28547	30388	LIV5	L142	97124	97074	34449	34474	38168	0
1	9536995	16066	16098	28697	28755	28547	30388	LIV5	L142	97124	97074	34449	34474	38168	0
1	9652656	16066	16098	28547	30388	LIV5	L142	97124	97074	34449	34474	38168	0
1	9731478	16066	28755	34474	38168	1
1	9758641	16066	16098	28697	28755	28547	30388	LIV5	L142	97124	97074	34449	34474	38168	1
1	9777577	16066	16098	28697	28755	28547	30388	LIV5	L142	97124	97074	34449	34474	38168	1
1	9832534	16066	16098	28697	28755	28547	30388	LIV5	L142	97124	97074	34449	34474	38168	1
1	10069940	16066	28697	28755	28547	30388	LIV5	L142	97124	97074	34449	34474	38168	1
1	10089506	16066	16098	28697	28755	28547	30388	LIV5	L142	97124	97074	34449	34474	38168	0
1	10129552	16066	16098	28697	28755	28547	30388	LIV5	L142	97124	97074	34449	34474	38168	0
1	10160173	16066	28697	28755	28547	30388	LIV5	L142	97124	97074	34449	38168	0
1	10169754	16098	28547	30388	LIV5	L142	97124	97074	34449	34474	38168	1
1	10198882	16098	28697	28755	30388	LIV5	L142	97124	97074	34449	34474	38168	1
1	10235587	28697	28755	L142	34474	38168	0
1	10258029	16066	28697	28755	28547	30388	LIV5	L142	97124	97074	34449	34474	38168	1
1	10270167	16066	16098	28697	28755	28547	30388	LIV5	L142	97124	97074	34449	34474	38168	1
1	10320398	16066	28697	30388	L142	34449	34474	38168	1
1	10405544	16066	16098	28697	28547	30388	L142	97074	34449	34474	38168	1
1	10488534	16066	16098	28697	28755	28547	30388	LIV5	L142	97124	97074	34449	34474	38168	1
1	10489061	16066	28697	28755	28547	30388	LIV5	L142	97124	97074	34449	34474	38168	0
1	10504003	16066	16098	28697	28755	LIV5	34449	34474	38168	0
1	10592769	16066	16098	28697	28755	28547	30388	LIV5	L142	97124	97074	34449	34474	38168	0
1	10686037	16066	16098	28697	28755	28547	30388	LIV5	L142	97124	97074	34449	34474	38168	0
1	10972239	30388	97074	34449	34474	38168	1
1	11003834	16066	16098	28697	28755	28547	30388	LIV5	L142	97124	97074	34449	34474	38168	1
1	11007149	16066	16098	28697	28755	28547	30388	LIV5	L142	97124	97074	34449	34474	38168	1
1	11035086	16066	16098	28697	28755	28547	30388	97074	34449	34474	38168	1
1	11035971	16066	16098	28697	28755	28547	30388	LIV5	L142	97124	97074	34449	34474	38168	0
1	11063672	16066	16098	28697	28755	28547	30388	LIV5	L142	97124	97074	34449	34474	38168	1
1	11094969	16066	16098	28697	28755	28547	30388	LIV5	L142	97074	34449	34474	38168	1
1	11102196	16066	16098	28697	28755	28547	30388	LIV5	L142	97124	97074	34449	34474	38168	1
1	11132820	16066	16098	28697	28755	28547	LIV5	L142	97124	97074	34449	34474	38168	1
1	11156362	16066	16098	28697	28755	28547	30388	LIV5	L142	97124	97074	34449	34474	38168	0
1	11161806	28547	30388	97074	34449	34474	38168	0
1	11190468	16066	16098	28697	28755	34449	34474	38168	0
1	11278317	16066	16098	28697	28547	30388	LIV5	L142	97124	97074	34449	34474	38168	0
1	11324076	16066	16098	28697	28755	28547	30388	LIV5	L142	97124	97074	34449	34474	38168	1
1	11404179	16066	16098	LIV5	L142	97124	97074	34449	34474	38168	1
1	11473399	16066	16098	28697	28755	28547	30388	LIV5	L142	97124	97074	34474	38168	0
1	11521753	16066	16098	28697	28755	LIV5	L142	97124	97074	34449	34474	38168	0
1	11580567	16066	16098	28697	28755	28547	30388	LIV5	L142	97124	97074	34449	34474	38168	0
1	11665605	16066	16098	28697	28755	28547	30388	LIV5	L142	97124	97074	34449	34474	38168	0
1	11790686	16066	16098	28697	28755	28547	30388	LIV5	34449	34474	38168	0
1	11821808	16066	16098	28697	28755	28547	30388	LIV5	L142	97124	97074	34449	34474	38168	0
1	11854228	34449	34474	38168	1
1	11936298	16066	16098	28697	28547	30388	LIV5	L142	97124	97074	34449	34474	38168	0
1	11955776	16066	16098	28697	28755	28547	30388	LIV5	L142	97124	97074	34449	34474	38168	0
1	12045400	16066	16098	28697	28755	28547	30388	LIV5	L142	97124	97074	34449	34474	38168	1
1	12130319	16066	16098	28697	28755	LIV5	L142	97124	97074	34449	34474	38168	0
1	12134515	16066	16098	28697	28755	LIV5	L142	34474	38168	0
1	12189999	16066	16098	28697	28755	28547	30388	L142	97074	34449	34474	38168	1
1	12213020	16066	16098	28697	28755	30388	LIV5	L142	97124	97074	34449	34474	38168	1
1	12236988	16066	16098	28697	28755	28547	30388	LIV5	L142	97124	97074	34449	34474	38168	1
1	12256894	16066	16098	28697	28755	28547	30388	LIV5	L142	97124	97074	34449	34474	38168	1
1	12316035	16066	16098	28697	28755	28547	30388	LIV5	L142	97124	97074	34449	34474	38168	1
1	12352525	16066	16098	28697	28755	28547	30388	LIV5	L142	97124	97074	34449	34474	38168	1
1	12385433	28547	34474	38168	0
1	12396519	28697	28755	28547	30388	LIV5	97124	97074	34449	34474	38168	1
1	12435930	16066	28547	97074	34474	38168	1
1	12440583	28697	28547	30388	LIV5	L142	97074	34474	38168	1
1	12504837	16066	16098	28697	28755	28547	30388	LIV5	L142	97124	97074	34449	34474	38168	0
1	12534354	16066	16098	28697	28755	28547	30388	LIV5	L142	97124	97074	34449	34474	38168	1
1	12589605	16066	16098	28697	28755	28547	30388	LIV5	L142	97124	97074	34449	34474	38168	1
1	12631803	16066	28697	28547	30388	LIV5	97074	34449	34474	38168	0
1	12832025	16066	16098	28697	28755	28547	30388	LIV5	L142	97124	97074	34449	34474	38168	1
1	12862481	28697	28755	LIV5	34449	34474	38168	1
1	13026633	28547	30388	LIV5	L142	97124	97074	34449	34474	38168	0
1	13272495	16066	16098	28697	28755	28547	30388	LIV5	L142	97124	97074	34449	34474	38168	0
1	13656435	16066	16098	28697	28755	28547	30388	L142	34449	34474	38168	0
1	13755605	16066	16098	28697	28755	28547	30388	LIV5	L142	97124	97074	34449	34474	38168	1
1	13768419	16066	16098	28697	28755	28547	30388	LIV5	L142	97124	97074	34449	34474	38168	1
1	13769535	16066	16098	28697	28755	28547	30388	LIV5	L142	97124	97074	34449	34474	38168	0
1	13815750	16066	16098	28697	28755	28547	30388	LIV5	L142	97124	97074	34449	34474	38168	1
1	13862717	16066	16098	28697	28755	28547	30388	LIV5	L142	97124	34449	34474	38168	1
1	13901144	16066	16098	28697	28755	28547	30388	LIV5	L142	97124	97074	34449	34474	38168	0
1	14023869	28755	97124	97074	34474	38168	1
1	14136201	28697	28755	28547	30388	LIV5	L142	97124	97074	34474	38168	0
1	14160204	16066	16098	28697	28755	28547	30388	LIV5	L142	97124	97074	34449	34474	38168	0
1	14183248	16098	28697	30388	LIV5	L142	97124	97074	34449	34474	38168	0
1	14214067	16066	16098	28697	28755	28547	30388	LIV5	L142	97124	97074	34449	34474	38168	0
1	14368712	16066	16098	28697	28755	28547	30388	LIV5	L142	97124	97074	34449	34474	38168	0
1	14381640	16066	16098	28697	28755	28547	30388	LIV5	L142	97124	97074	34449	34474	38168	0
1	14454858	34449	34474	38168	1
1	14466777	16066	16098	28697	28755	28547	30388	LIV5	L142	97124	97074	34449	34474	38168	0
1	14477776	16066	16098	28697	28755	28547	30388	LIV5	L142	97124	97074	34449	34474	38168	0
1	14503699	16066	16098	28697	28755	28547	30388	LIV5	L142	97124	97074	34449	34474	38168	1
1	14505674	16066	16098	28697	28755	28547	30388	LIV5	L142	97124	97074	34449	34474	38168	0
1	14533548	16066	16098	28697	28755	28547	30388	LIV5	L142	97124	97074	34449	34474	38168	0
1	14580997	28697	28755	28547	30388	LIV5	L142	34449	34474	38168	1
1	14591699	16066	16098	28697	28755	28547	30388	LIV5	L142	97074	34449	34474	38168	1
1	14683912	34449	34474	38168	1
1	14698674	16066	16098	28697	28755	28547	30388	LIV5	L142	97124	97074	34449	34474	38168	1
1	14713357	16066	16098	28697	28755	28547	30388	LIV5	L142	97124	34449	34474	38168	1
1	14743941	16066	16098	28697	28755	28547	30388	LIV5	L142	97124	97074	34449	34474	38168	0
1	14815027	16066	16098	28697	28755	28547	30388	LIV5	L142	97124	97074	34449	34474	38168	1
1	14831138	16066	16098	28697	28755	28547	30388	LIV5	L142	97124	97074	34449	34474	38168	0
1	14971831	16066	16098	28697	28755	28547	30388	LIV5	L142	97124	97074	34449	34474	38168	1
1	15045214	16066	16098	28697	28755	28547	30388	LIV5	L142	97124	97074	34449	34474	38168	1
1	15091516	16066	16098	28697	28755	28547	30388	LIV5	L142	97124	97074	34449	34474	38168	1
1	15156155	16066	16098	28697	28755	28547	30388	LIV5	L142	97124	97074	34449	34474	38168	1
1	15163402	16098	28755	97074	34474	38168	0
1	15201880	16066	16098	28697	28755	28547	30388	LIV5	L142	97124	97074	34449	34474	38168	1
1	15206901	16066	16098	28697	28755	28547	30388	LIV5	L142	97124	97074	34449	34474	38168	0
1	15224408	16066	16098	28697	28755	28547	30388	LIV5	L142	97124	97074	34449	34474	38168	1
1	15260085	16066	16098	28697	28755	28547	30388	LIV5	L142	97124	97074	34449	34474	38168	1
1	15292907	16066	16098	28697	28755	28547	30388	LIV5	L142	97124	97074	34449	34474	38168	1
1	15335726	16066	16098	28697	28755	28547	30388	LIV5	L142	97124	97074	34449	34474	38168	0
1	15342190	16066	16098	28697	28755	28547	L142	97124	97074	34449	34474	38168	0
1	15343909	16066	16098	28697	28547	30388	LIV5	97124	97074	34449	34474	38168	0
1	15395468	16066	16098	28697	28547	30388	LIV5	L142	97124	97074	34449	34474	38168	0
1	15405617	16066	16098	28697	28755	28547	30388	LIV5	L142	97124	97074	34449	34474	38168	1
1	15438986	28697	28755	28547	30388	LIV5	L142	97074	34449	38168	0
1	15455436	16098	30388	97124	38168	0
1	15479254	16066	16098	28697	28755	28547	30388	LIV5	97124	34449	34474	38168	0
1	15489334	16066	16098	28697	28755	28547	L142	97124	97074	34449	34474	38168	0
1	15490091	16098	28547	30388	LIV5	97124	34474	38168	0
1	15505026	16066	16098	28697	28755	28547	LIV5	L142	97124	97074	34449	34474	38168	0
1	15514213	16066	16098	28697	28755	28547	30388	LIV5	L142	97124	97074	34449	34474	38168	0
1	15518966	28547	30388	38168	0
1	15527682	16098	28697	28755	28547	30388	LIV5	L142	97124	97074	34449	34474	38168	0
1	15527897	16066	28697	28755	LIV5	L142	97124	97074	34449	34474	38168	0
1	15530767	16098	28755	30388	LIV5	L142	97124	97074	34449	34474	38168	0
1	15539519	16066	16098	28697	28547	30388	LIV5	L142	97124	97074	34449	34474	38168	0
1	15545724	16066	16098	28697	28755	28547	30388	LIV5	L142	97124	97074	34449	34474	38168	0
1	15556422	16066	16098	28697	28755	28547	30388	LIV5	L142	97124	97074	34449	34474	38168	1
1	15580116	28547	30388	38168	1
1	15582730	28547	LIV5	34474	38168	1
1	15624441	16066	16098	28697	28755	28547	30388	97124	97074	34449	34474	38168	1
1	15637445	16066	16098	28697	28755	28547	30388	LIV5	L142	97124	97074	34449	34474	38168	0
1	15744549	16066	16098	28697	28755	28547	30388	LIV5	L142	97124	97074	34449	34474	38168	1
1	15754243	16066	16098	28697	28755	28547	30388	LIV5	L142	97124	97074	34449	34474	38168	1
1	15764278	16066	16098	28697	28755	28547	30388	LIV5	L142	97124	97074	34474	38168	1
1	15987301	16066	16098	28697	28755	28547	30388	LIV5	L142	97124	97074	34449	34474	38168	1
1	16038375	16066	16098	28697	28547	30388	LIV5	L142	97124	97074	34449	34474	38168	0
1	16039870	16066	16098	28697	28755	28547	30388	LIV5	L142	97124	97074	34449	34474	38168	0
1	16107687	16098	28697	38168	0
1	16120837	16066	16098	28697	28755	28547	30388	LIV5	L142	97124	97074	34449	34474	38168	0
1	16167549	16098	28697	97124	97074	34449	34474	38168	1
1	16209165	16066	16098	28697	28547	30388	LIV5	L142	97124	97074	34449	34474	38168	0
1	16210911	16066	16098	28697	28755	28547	30388	LIV5	L142	97124	97074	34449	34474	38168	0
1	16221192	16066	16098	28697	28755	28547	30388	LIV5	L142	97124	97074	34449	34474	38168	1
1	16464429	16066	16098	28697	28755	28547	30388	LIV5	L142	97074	34449	34474	38168	0
1	16513083	16066	16098	28697	28755	28547	30388	LIV5	L142	97124	97074	34449	34474	38168	1
1	17019887	16066	16098	28697	28755	28547	30388	LIV5	L142	97124	34449	34474	38168	1
1	17048068	16066	16098	28697	28755	28547	30388	LIV5	L142	97124	97074	34449	34474	38168	0
1	17164442	16066	16098	28697	28547	30388	LIV5	L142	34449	34474	38168	0
1	17270814	97074	34449	34474	38168	0
1	17298665	97124	97074	38168	1
1	17388015	16098	28697	28755	97124	34449	38168	1
1	17438773	16066	16098	28697	28755	28547	30388	97124	97074	34449	34474	38168	0
1	17589469	16066	16098	28697	28547	30388	LIV5	L142	97124	97074	38168	0
1	17597055	28547	30388	LIV5	34449	34474	38168	0
1	17607387	16066	16098	28697	28755	28547	30388	LIV5	L142	97124	97074	34449	34474	38168	0
1	17851284	16066	16098	28697	28755	28547	30388	LIV5	L142	97124	97074	34449	34474	38168	1
1	17955689	16066	16098	28697	28755	28547	30388	LIV5	L142	97124	97074	34449	34474	38168	0
1	18014797	16098	28755	30388	97124	34449	34474	38168	0
1	18016314	16066	16098	28697	28755	28547	30388	LIV5	L142	97124	97074	34449	34474	38168	0
1	18074657	16066	16098	28697	28755	LIV5	97124	34449	34474	38168	1
1	18270119	16066	16098	28755	28547	30388	LIV5	L142	97124	97074	34449	34474	38168	0
1	18303183	16066	16098	28697	28755	28547	30388	LIV5	L142	97124	97074	34449	34474	38168	0
1	18315363	16098	28755	LIV5	97124	34449	34474	38168	0
1	18337286	16066	16098	28697	28755	28547	30388	LIV5	L142	97124	97074	34449	34474	38168	0
1	18445843	16066	16098	28697	28755	28547	30388	LIV5	L142	97124	97074	34449	34474	38168	1
1	18554105	16066	30388	LIV5	L142	97074	34474	38168	1
1	18566104	16066	16098	28697	28547	30388	LIV5	L142	97124	34449	34474	38168	0
1	18593000	16066	28547	30388	LIV5	L142	97124	97074	34449	34474	38168	1
1	18651287	28697	28755	38168	1
1	18679102	16066	16098	28697	28755	LIV5	L142	97124	97074	34449	34474	38168	1
1	18802011	16066	16098	28697	28755	28547	30388	LIV5	L142	97124	97074	34449	34474	38168	0
1	18831919	28547	34449	38168	1
1	18898351	16098	28697	97074	34449	38168	1
1	18898635	16066	16098	28697	28755	28547	30388	LIV5	L142	97124	97074	34449	34474	38168	1
1	18927848	16066	16098	28697	28755	28547	30388	LIV5	L142	97124	97074	34449	34474	38168	1
1	18969181	16066	16098	28697	28755	28547	30388	LIV5	L142	97124	97074	34449	34474	38168	0
1	19332907	28697	28755	28547	30388	LIV5	L142	34449	34474	38168	0
1	19360891	16066	16098	28697	28755	28547	30388	LIV5	L142	97124	97074	34449	34474	38168	0
1	19383302	16066	16098	28697	28755	28547	30388	LIV5	L142	97124	97074	34449	34474	38168	0
1	19395275	16066	16098	28697	28755	28547	30388	LIV5	L142	97124	97074	34449	34474	38168	0
1	19482214	16066	16098	28697	28755	28547	30388	LIV5	L142	97124	97074	34449	34474	38168	1
1	19498376	16066	16098	28697	28755	28547	30388	LIV5	L142	97124	97074	34449	34474	38168	1
1	19560845	16066	16098	28697	28755	28547	30388	LIV5	L142	97124	97074	34449	34474	38168	1
1	19615791	16066	16098	28697	28755	28547	30388	LIV5	L142	97124	97074	34449	34474	38168	0
1	19645730	16066	16098	28697	28755	28547	30388	LIV5	L142	97124	97074	34449	34474	38168	0
1	19722791	16066	16098	28697	28755	28547	30388	LIV5	L142	97124	97074	34449	34474	38168	0
1	19730156	16066	16098	28697	28755	28547	30388	LIV5	L142	97124	97074	34449	34474	38168	0
1	19741865	16066	16098	28697	28755	28547	30388	LIV5	L142	97124	97074	34449	34474	38168	0
1	19924473	16066	16098	28697	28755	28547	30388	LIV5	L142	97124	97074	34449	34474	38168	0
1	19926364	16066	16098	28697	28755	28547	30388	LIV5	L142	97074	34449	34474	38168	1
1	19974639	16098	28697	28755	30388	LIV5	L142	97124	97074	34449	34474	38168	1
1	20013556	16066	16098	28697	28755	28547	30388	LIV5	L142	97124	97074	34449	34474	38168	0
1	20018727	97124	97074	34449	34474	38168	1
1	20052354	16066	16098	28755	28547	30388	LIV5	L142	97124	97074	34449	34474	38168	0
1	20076716	16098	34449	38168	0
1	20079239	16066	16098	28697	28755	28547	30388	LIV5	L142	97124	97074	34449	34474	38168	0
1	20290964	16066	16098	28697	28755	28547	30388	LIV5	L142	97124	97074	34449	34474	38168	1
1	20358345	16066	16098	28697	28755	28547	30388	LIV5	L142	97124	97074	34449	34474	38168	0
1	20431925	16066	16098	28697	28755	28547	30388	LIV5	L142	97124	97074	34449	34474	38168	0
1	20477136	16066	16098	28697	28755	28547	30388	LIV5	L142	97124	34449	34474	38168	0
1	20566633	16066	16098	28547	30388	LIV5	L142	97124	97074	34449	38168	0
1	20571783	16066	16098	28697	28547	30388	LIV5	L142	97124	97074	34449	34474	38168	1
1	20613785	16066	16098	28697	28755	28547	30388	LIV5	L142	97124	97074	34449	34474	38168	1
1	20752365	16066	16098	28697	28755	28547	30388	LIV5	L142	97124	97074	34449	34474	38168	0
1	20760712	16066	28697	28755	28547	30388	L142	97124	34449	34474	38168	1
1	20868321	16066	16098	28697	28755	28547	30388	LIV5	L142	97124	97074	34449	34474	38168	1
1	20947057	16066	16098	28697	28755	28547	30388	LIV5	L142	97124	97074	34449	34474	38168	0
1	20973309	16066	16098	28697	28755	28547	30388	LIV5	L142	97124	97074	34449	34474	38168	1
1	21003936	16066	16098	28697	28755	28547	30388	LIV5	L142	97124	97074	34449	34474	38168	0
1	21084562	16066	16098	28697	28755	28547	30388	LIV5	L142	97074	34474	38168	1
1	21107972	16066	16098	28697	28755	28547	30388	LIV5	L142	97124	97074	34449	34474	38168	0
1	21110644	16066	16098	28697	28755	28547	30388	LIV5	L142	97124	97074	34449	34474	38168	0
1	21398237	16066	16098	28697	28755	28547	30388	LIV5	L142	97124	97074	34449	34474	38168	0
1	21429713	16066	16098	28697	28755	28547	30388	LIV5	L142	97124	97074	34449	34474	38168	1
1	21478872	16066	16098	28697	28755	28547	30388	LIV5	L142	97124	97074	34449	34474	38168	0
1	21644559	16066	16098	28697	28755	28547	30388	LIV5	L142	97124	97074	34449	34474	38168	0
1	21725904	16066	16098	28697	28755	28547	30388	LIV5	L142	97124	97074	34449	34474	38168	0
1	21783664	16066	16098	28697	28755	28547	30388	LIV5	L142	97124	97074	34449	34474	38168	0
1	21982506	16066	16098	28697	28547	30388	LIV5	L142	97124	34449	34474	38168	1
1	22012226	16066	16098	28697	28547	30388	34474	38168	1
1	22166272	16066	16098	28697	28755	28547	30388	LIV5	L142	97124	97074	34449	34474	38168	1
1	22199641	16066	16098	28697	28755	28547	30388	LIV5	L142	97124	97074	34449	34474	38168	0
1	22249403	16066	28697	28755	28547	30388	LIV5	L142	97124	97074	34449	34474	38168	0
1	22304120	97124	97074	34449	34474	38168	1
1	22312481	16066	16098	28697	28755	28547	30388	LIV5	L142	97124	97074	34449	34474	38168	0
1	22325999	16066	16098	28697	28755	28547	30388	LIV5	97124	97074	34449	34474	38168	1
1	22363981	16066	16098	28697	28755	28547	30388	LIV5	L142	97124	97074	34449	34474	38168	0
1	22395964	16066	16098	28697	28755	28547	30388	LIV5	L142	97124	97074	34449	34474	38168	1
1	22396511	16066	16098	28697	28755	28547	30388	LIV5	L142	97124	97074	34449	34474	38168	1
1	22409239	16066	16098	28697	28755	28547	30388	LIV5	L142	97124	97074	34449	34474	38168	0
1	22455910	16066	16098	28697	28755	28547	30388	LIV5	L142	97124	97074	34449	34474	38168	0
1	22490198	16066	16098	28697	28755	28547	30388	LIV5	L142	97124	34449	34474	38168	0
1	22551008	16066	16098	28697	28755	28547	30388	LIV5	L142	97124	97074	34449	34474	38168	0
1	22609613	16066	16098	30388	LIV5	97124	97074	34449	34474	38168	0
1	22666224	16066	16098	28697	28755	28547	30388	LIV5	L142	97124	97074	34449	34474	38168	1
1	22758706	16066	16098	28697	28755	28547	30388	LIV5	L142	97124	97074	34449	34474	38168	0
1	22762112	16066	16098	28697	28755	28547	30388	LIV5	L142	97124	97074	34449	34474	38168	1
1	22772869	16066	16098	28697	28755	28547	30388	LIV5	L142	97124	97074	34449	34474	38168	0
1	22791708	28755	34449	38168	0
1	22868608	16066	16098	28697	28755	28547	30388	LIV5	L142	97124	97074	34449	34474	38168	1
1	22936354	16066	16098	28697	28755	28547	30388	LIV5	L142	97124	97074	34449	34474	38168	1
1	23072469	16066	16098	28697	28755	28547	30388	LIV5	L142	97124	97074	34449	34474	38168	1
1	23199109	16066	16098	28697	28755	28547	30388	LIV5	L142	97124	97074	34449	34474	38168	0
1	23261592	16066	16098	28697	28755	28547	30388	LIV5	L142	97124	97074	34449	34474	38168	0
1	23262851	16098	28697	28755	28547	30388	LIV5	L142	97124	97074	34449	34474	38168	1
1	23388710	16066	16098	28697	28755	28547	30388	LIV5	L142	97074	34449	34474	38168	0
1	23398778	16066	28755	LIV5	97124	34449	34474	38168	0
1	23403516	16066	16098	28697	28755	28547	30388	LIV5	L142	97124	97074	34449	34474	38168	0
1	23450305	16066	16098	28697	28755	28547	30388	LIV5	L142	97124	97074	34449	34474	38168	1
1	23613586	16066	16098	28697	28755	28547	30388	LIV5	L142	97124	97074	34449	34474	38168	0
1	23663254	16066	16098	28697	28755	28547	30388	LIV5	L142	97124	97074	34449	34474	38168	1
1	23800511	16066	16098	28697	28755	LIV5	L142	34449	34474	38168	0
1	23976040	16066	16098	28755	28547	30388	LIV5	L142	97124	97074	34449	34474	38168	0
1	23990090	16066	28547	30388	LIV5	L142	97124	97074	34449	34474	38168	0
1	24011183	16066	16098	28697	28755	L142	34449	34474	38168	0
1	24077981	16066	16098	28697	28755	28547	30388	LIV5	L142	97124	97074	34449	34474	38168	0
1	24114690	16066	16098	28697	28547	30388	LIV5	L142	97124	97074	34449	34474	38168	1
1	24134172	16066	16098	28697	28755	28547	30388	LIV5	L142	97124	97074	34449	34474	38168	0
1	24241840	16066	16098	28697	28755	28547	30388	LIV5	L142	97124	97074	34449	34474	38168	1
1	24322161	16066	16098	28697	28755	28547	30388	LIV5	L142	97124	97074	34449	34474	38168	0
1	24346589	16066	16098	28697	28755	28547	30388	LIV5	L142	97124	97074	34449	34474	38168	0
1	24474388	30388	LIV5	L142	97074	34449	34474	38168	1
1	24474825	16066	16098	28697	28755	28547	30388	LIV5	L142	97124	97074	34449	34474	38168	0
1	24482632	28755	28547	30388	97124	97074	34449	34474	38168	1
1	24522022	16066	16098	28697	28755	28547	30388	LIV5	L142	97124	97074	34449	34474	38168	1
1	24633872	16066	16098	28697	28755	28547	30388	LIV5	L142	97124	97074	34449	34474	38168	0
1	24679280	16066	16098	28697	28755	28547	30388	LIV5	L142	97124	97074	34449	34474	38168	1
1	24712885	16066	16098	28697	34449	38168	0
1	24731821	16066	16098	28697	28755	LIV5	L142	97124	97074	34449	34474	38168	1
1	24783010	16066	16098	28697	28755	28547	30388	LIV5	L142	97124	97074	34449	34474	38168	1
1	24898411	16066	16098	28697	28755	28547	30388	LIV5	L142	97124	97074	34449	34474	38168	0
1	24908327	16066	16098	28697	28755	28547	30388	LIV5	L142	97124	97074	34449	34474	38168	1
1	24914868	28755	28547	30388	34449	34474	38168	1
1	24944252	16066	16098	28697	28755	28547	30388	LIV5	L142	97124	97074	34449	34474	38168	0
1	24950161	16066	16098	28697	28755	28547	30388	LIV5	L142	97124	97074	34449	34474	38168	0
1	25046443	16066	16098	28697	28755	28547	30388	LIV5	L142	97124	97074	34449	34474	38168	0
1	25047753	16098	28697	28755	34449	34474	38168	0
1	25199718	16066	30388	LIV5	34449	38168	0
1	25258235	16098	28755	28547	30388	LIV5	L142	97124	97074	34449	34474	38168	1
1	25309631	16066	16098	28697	28755	28547	30388	LIV5	L142	97124	97074	34449	34474	38168	0
1	25353883	16066	16098	28697	28755	34474	38168	1
1	25458890	16066	16098	28697	28755	28547	30388	LIV5	L142	97124	34449	34474	38168	0
1	25467259	16066	16098	28697	28755	28547	30388	LIV5	L142	97124	97074	34449	34474	38168	0
1	25591257	16066	16098	28697	28755	28547	30388	LIV5	L142	97124	97074	34449	34474	38168	1
1	25641624	16098	28697	28547	30388	LIV5	L142	97124	97074	38168	1
1	25665048	16066	16098	28697	28755	28547	30388	LIV5	L142	97124	97074	34449	34474	38168	1
1	25707986	16066	16098	28697	28755	28547	30388	LIV5	L142	97124	97074	34449	34474	38168	1
1	25714346	16066	16098	28697	28755	28547	30388	LIV5	L142	34449	34474	38168	1
1	25774263	16066	16098	28697	28755	28547	30388	LIV5	L142	34449	34474	38168	1
1	25783422	16066	16098	28697	28755	28547	30388	LIV5	L142	97124	97074	34449	34474	38168	0
1	25800215	28697	28755	34449	34474	38168	0
1	25895876	16066	16098	28697	28755	28547	30388	L142	34449	34474	38168	0
1	25944582	28697	28547	30388	LIV5	L142	97124	97074	34449	34474	38168	0
1	25958022	97124	34449	38168	1
1	26051045	16066	16098	28697	28755	28547	30388	LIV5	L142	97124	97074	34449	34474	38168	1
1	26065730	16066	16098	28697	28755	LIV5	L142	97124	34449	34474	38168	1
1	26076810	16066	16098	28697	28755	34449	34474	38168	1
1	26174517	16066	16098	28697	28755	28547	30388	LIV5	L142	97124	97074	34449	34474	38168	1
1	26223830	16066	16098	28697	28755	28547	30388	LIV5	L142	97124	97074	34449	34474	38168	1
1	26286890	16066	16098	28755	28547	30388	LIV5	L142	97124	97074	34449	34474	38168	0
1	26346538	16066	16098	28697	28755	28547	30388	LIV5	L142	97124	97074	34449	34474	38168	0
1	26366068	16066	16098	28697	28755	28547	30388	LIV5	L142	97124	97074	34449	34474	38168	0
1	26489490	28697	30388	LIV5	97124	97074	34449	34474	38168	1
1	26602441	28697	28547	LIV5	97124	34449	34474	38168	1
1	26624799	16066	16098	28697	28755	28547	30388	LIV5	L142	97124	97074	34449	34474	38168	1
1	26663570	16066	16098	28697	28755	28547	30388	LIV5	L142	97124	97074	34449	34474	38168	1
1	26711629	16066	16098	28697	28755	28547	30388	LIV5	L142	97124	97074	34449	34474	38168	1
1	26745861	16066	16098	28697	28755	28547	30388	LIV5	L142	97124	97074	34449	34474	38168	1
1	26781378	16098	28755	34449	34474	38168	1
1	26838272	28697	28547	30388	LIV5	97074	34449	34474	38168	1
1	26841460	16066	16098	28697	28755	28547	30388	LIV5	L142	97124	97074	34449	34474	38168	0
1	26945633	16066	16098	28697	28755	28547	30388	LIV5	97124	97074	34449	34474	38168	0
1	27003933	16066	16098	28697	28547	30388	LIV5	L142	97074	34449	34474	38168	0
1	27007278	16098	28697	28755	28547	30388	97124	97074	34449	34474	38168	0
1	27049400	16098	28697	28547	30388	97124	34449	34474	38168	0
1	27180093	16066	16098	28697	28755	28547	30388	LIV5	L142	97124	97074	34449	34474	38168	1
1	27181821	16066	16098	28697	28755	28547	30388	LIV5	L142	97124	97074	34449	34474	38168	1
1	27256678	16066	16098	28697	28755	28547	30388	LIV5	L142	97124	97074	34449	34474	38168	1
1	27320088	16066	16098	28697	28755	28547	30388	LIV5	L142	97124	97074	34449	34474	38168	0
1	27338464	16066	16098	28697	28755	28547	30388	LIV5	L142	97124	97074	34449	34474	38168	0
1	27383338	28547	30388	L142	34449	38168	0
1	27387714	LIV5	L142	97124	97074	38168	0
1	27399364	L142	97124	38168	1
1	27427504	16066	16098	28697	28755	28547	30388	LIV5	L142	97124	97074	34449	34474	38168	0
1	27432875	16066	16098	28547	30388	97124	97074	34449	34474	38168	0
1	27482952	16066	28697	28755	28547	30388	LIV5	L142	97124	97074	34449	34474	38168	1
1	27493679	16098	28697	28755	28547	30388	LIV5	L142	97124	97074	34449	34474	38168	0
1	27518477	16066	16098	28697	28755	28547	30388	LIV5	L142	97124	97074	34449	34474	38168	0
1	27543955	16066	16098	28697	28755	28547	30388	LIV5	L142	97124	97074	34449	34474	38168	0
1	27549248	16066	28697	28755	28547	30388	97124	34449	34474	38168	0
1	27634817	16066	16098	28697	28755	28547	30388	LIV5	L142	97124	97074	34449	34474	38168	0
1	27645461	16066	16098	28697	28755	28547	30388	LIV5	L142	97124	97074	34449	34474	38168	1
1	27671209	16066	16098	28755	30388	L142	97124	97074	34449	38168	0
1	27719462	16066	16098	28697	28755	28547	30388	LIV5	L142	97124	97074	34449	34474	38168	0
1	27801910	16066	16098	16098	28697	28755	28547	30388	LIV5	L142	97074	34449	34474	38168	1
1	27857049	16066	16098	28697	28755	28547	30388	LIV5	L142	97124	97074	34449	34474	38168	1
1	27878658	16066	16098	28697	28755	28547	30388	LIV5	L142	97124	97074	34449	34474	38168	0
1	28041005	16066	16098	28697	28755	28547	30388	LIV5	L142	97124	97074	34449	34474	38168	1
1	28085525	16066	28697	30388	L142	34449	38168	0
1	28139002	16066	16098	28697	28755	28547	30388	LIV5	L142	97124	97074	34449	34474	38168	1
1	28216813	16066	16098	28697	28755	28547	30388	LIV5	L142	97124	34449	34474	38168	1
1	28253877	16066	16098	28697	28755	30388	LIV5	L142	97124	97074	34449	34474	38168	1
1	28292500	16066	16098	28547	30388	LIV5	L142	97124	97074	34449	34474	38168	1
1	28392780	28697	28755	L142	97124	97074	34449	34474	38168	0
1	28801714	16066	16098	28697	28755	28547	30388	LIV5	L142	97124	97074	34449	34474	38168	1
1	29001379	16066	16098	28697	28755	LIV5	L142	97124	34449	34474	38168	1
1	29108066	16066	16098	28697	28755	LIV5	L142	97124	97074	34449	34474	38168	0
1	29655055	16066	L142	34449	34474	38168	0
1	29963154	16066	16098	28697	28755	28547	30388	LIV5	L142	97124	97074	34449	34474	38168	0
1	30020898	16066	16098	28697	28755	28547	30388	LIV5	L142	97124	97074	34449	34474	38168	0
1	30081341	16066	16098	28697	28755	28547	30388	LIV5	L142	97124	97074	34449	34474	38168	1
1	30107550	16066	16098	28697	28755	28547	30388	LIV5	L142	97124	97074	34449	34474	38168	1
1	30125196	16066	16098	28697	28755	28547	30388	LIV5	L142	97124	97074	34449	34474	38168	0
1	30196157	16066	16098	28697	28755	28547	30388	LIV5	L142	97124	97074	34449	34474	38168	0
1	30270212	16066	16098	28697	28755	28547	30388	LIV5	L142	97124	97074	34449	34474	38168	1
1	30276357	16066	16098	28697	28755	28547	30388	LIV5	L142	97124	97074	34449	34474	38168	1
1	30337259	16066	16098	28697	28755	28547	30388	LIV5	L142	97124	97074	34449	34474	38168	0
1	30383449	16066	16098	28697	28755	28547	30388	LIV5	L142	97124	97074	34449	34474	38168	0
1	30392714	16066	16098	28697	28755	28547	30388	LIV5	L142	97124	97074	34449	34474	38168	1
1	30396646	16066	16098	28697	28755	28547	30388	LIV5	L142	97124	97074	34449	34474	38168	1
1	30454780	16066	16098	28697	28755	28547	30388	LIV5	L142	97124	97074	34449	34474	38168	1
1	30463006	16098	28697	28755	28547	30388	LIV5	L142	97124	97074	34449	34474	38168	0
1	30576447	16098	28697	28755	LIV5	L142	97124	97074	34449	34474	38168	1
1	30686577	16066	16098	28697	28755	28547	30388	LIV5	L142	97124	97074	34449	34474	38168	0
1	30739888	16066	16098	28697	28755	28547	30388	LIV5	L142	97124	97074	34449	34474	38168	0
1	30760654	16066	16098	28697	28755	28547	30388	LIV5	L142	97124	97074	34449	34474	38168	1
1	30762658	16066	16098	28697	28755	28547	30388	LIV5	L142	97124	97074	34449	34474	38168	0
1	30904454	28697	28755	97074	34449	34474	38168	0
1	30932719	16066	16098	28697	28755	28547	30388	LIV5	L142	97124	97074	34449	34474	38168	0
1	30933358	16066	16098	28697	28755	28547	30388	LIV5	L142	97124	97074	34449	34474	38168	0
1	30950470	16066	16098	28697	28755	28547	30388	LIV5	L142	97124	97074	34449	34474	38168	0
1	30974712	16066	16098	28697	28755	28547	30388	L142	97124	97074	34449	34474	38168	0
1	31014794	28697	28755	28547	30388	LIV5	L142	97124	97074	34449	34474	38168	1
1	31020907	16066	16098	28697	28755	LIV5	L142	97124	97074	34449	34474	38168	0
1	31030756	16066	16098	28697	28755	28547	30388	LIV5	L142	97074	34449	34474	38168	0
1	31034896	16066	16098	28697	28755	28547	30388	LIV5	L142	97124	97074	34449	34474	38168	0
1	31051315	16066	16098	28697	28755	28547	30388	LIV5	97074	34449	34474	38168	1
1	31069623	16066	16098	28697	28755	28547	30388	LIV5	L142	97124	97074	34449	34474	38168	0
1	31095559	28697	28755	38168	1
1	31144860	16066	16098	28697	28755	28547	30388	L142	97124	97074	34449	34474	38168	1
1	31224843	16066	16098	28697	28755	28547	30388	LIV5	L142	97124	97074	34449	34474	38168	0
1	31232272	16066	16098	28697	28755	28547	30388	LIV5	L142	97124	97074	34449	34474	38168	0
1	31270409	28755	LIV5	34449	34474	38168	1
1	31281386	16066	16098	28697	28755	28547	30388	LIV5	L142	97124	97074	34449	34474	38168	0
1	31333627	16066	16098	28697	28755	28547	30388	LIV5	L142	97124	97074	34449	34474	38168	1
1	31351952	16098	28697	28755	28547	30388	LIV5	L142	97124	34449	34474	38168	0
1	31467131	16066	16098	28697	28547	30388	LIV5	L142	97124	97074	34449	34474	38168	0
1	31489776	16098	28697	28755	28547	30388	97124	97074	34449	34474	38168	1
1	31521566	16066	16098	28697	28755	28547	30388	LIV5	97124	97074	34449	34474	38168	1
1	31529013	16066	16098	28697	28755	28547	30388	LIV5	L142	97124	97074	34449	34474	38168	1
1	31609342	16066	16098	28697	28755	28547	30388	LIV5	L142	97124	97074	34449	34474	38168	1
1	31609545	16066	16098	28697	28755	28547	30388	LIV5	L142	97124	97074	34449	34474	38168	0
1	31630508	16066	16098	28697	28755	28547	30388	LIV5	L142	97124	97074	34449	34474	38168	1
1	31631212	16098	28697	28755	28547	30388	LIV5	L142	97124	97074	34449	34474	38168	1
1	31677036	16066	16098	28755	28547	30388	LIV5	L142	97124	97074	34449	34474	34474	38168	0
1	31709968	16066	16098	28697	28755	28547	30388	LIV5	L142	97074	34449	34474	38168	1
1	31725808	16066	16098	28697	28755	28547	30388	LIV5	L142	97124	97074	34449	34474	38168	1
1	31802945	16066	16098	28697	28755	28547	30388	LIV5	L142	97124	97074	34449	34474	38168	1
1	31826695	16066	16098	28697	28755	28547	30388	LIV5	L142	97124	97074	34449	34474	38168	1
1	31834255	16066	16098	28697	28755	28547	30388	LIV5	L142	97124	97074	34449	34474	38168	0
1	31835895	28547	97074	34449	38168	0
1	31878715	16066	16098	28697	28755	28547	30388	97124	97074	34449	34474	38168	0
1	31932701	28547	30388	38168	0
1	32047898	16066	16098	28697	28755	28547	30388	LIV5	L142	97124	97074	34449	34474	38168	0
1	32068848	16066	16098	28697	28755	28547	30388	LIV5	L142	97124	97074	34449	34474	38168	0
1	32091147	16066	16098	28697	28755	28547	30388	LIV5	L142	97124	97074	34449	34474	38168	1
1	32143313	L142	97074	34449	34474	38168	1
1	32147194	16066	16098	28697	28755	28547	30388	LIV5	L142	97124	97074	34449	34474	38168	0
1	32180513	16066	16098	28697	28755	28547	30388	LIV5	L142	97124	97074	34449	34474	38168	1
1	32317321	16066	16098	28697	28755	28547	30388	LIV5	L142	97124	97074	34449	34474	38168	0
1	32327946	16066	16098	28697	28755	28547	30388	LIV5	L142	97124	97074	34449	34474	38168	0
1	32356330	16066	16098	28697	28755	28547	30388	LIV5	L142	97124	97074	34449	34474	38168	1
1	32364540	L142	34474	38168	1
1	32503511	16066	16098	28697	28755	28547	30388	LIV5	L142	97124	97074	34449	34474	38168	1
1	32539022	16066	16098	28697	28755	28547	30388	LIV5	L142	97124	97074	34449	34474	38168	1
1	32639079	16066	16098	28697	28755	28547	30388	LIV5	L142	97124	97074	34449	34474	38168	1
1	32671398	16066	16098	28697	28755	28547	30388	LIV5	L142	97124	97074	34449	34474	38168	1
1	33096377	16066	16098	28755	28547	30388	LIV5	L142	97124	97074	34449	34474	38168	1
1	33177982	16066	16098	28697	28755	LIV5	97124	97074	34449	34474	38168	0
1	33213662	16066	16098	28697	28755	30388	LIV5	L142	97124	97074	34449	34474	38168	1
1	33218455	16066	28755	34449	38168	1
1	33249465	16066	16098	28697	28755	28547	30388	LIV5	L142	97124	97074	34449	34474	38168	1
1	33368998	16066	16098	28697	28755	28547	30388	LIV5	L142	97124	97074	34449	34474	38168	1
1	33404882	16066	16098	28697	28755	28547	30388	L142	97124	97074	34449	34474	38168	0
1	33663172	16066	16098	28697	28755	28547	30388	LIV5	L142	97124	97074	34449	34474	38168	0
1	33768713	16066	16098	28697	28755	28547	30388	LIV5	34474	38168	0
1	33796163	16066	16098	28697	28755	28547	L142	97124	34449	34474	38168	0
1	33869527	16066	16098	28697	28755	28547	30388	LIV5	L142	97124	97074	34449	34474	38168	0
1	34194228	16098	28697	28547	LIV5	34449	38168	0
1	34246118	16098	28697	28755	28547	L142	34449	34474	38168	0
1	34295019	16098	L142	34474	38168	1
1	34299239	16066	16098	28697	28755	28547	30388	LIV5	L142	97124	97074	34449	34474	38168	0
1	34316352	16066	16098	28697	28755	28547	30388	LIV5	L142	97124	97074	34449	34474	38168	1
1	34374810	16066	16098	28697	28755	28547	30388	LIV5	L142	97124	97074	34449	34474	38168	0
1	34415619	16098	28697	28755	LIV5	L142	34449	38168	1
1	34449201	16066	16098	28697	28755	28547	30388	LIV5	L142	97124	97074	34449	34474	38168	1
1	34467080	16066	16098	28697	28755	28547	LIV5	97074	34449	38168	1
1	34543403	16066	16098	28697	28755	28547	30388	LIV5	L142	97124	97074	34449	34474	38168	1
1	34597742	16066	16098	28697	28755	28547	30388	LIV5	L142	97124	97074	34449	34474	38168	1
1	34608755	16066	16098	28697	28755	28547	30388	LIV5	L142	97124	97074	34449	34474	38168	1
1	34704870	16066	16098	28697	28755	28547	30388	LIV5	L142	97124	97074	34449	34474	38168	0
1	34806251	16066	16098	28697	28755	28547	30388	LIV5	L142	97124	97074	34449	34474	38168	0
1	34844242	16098	28697	28755	LIV5	L142	97124	97074	34449	34474	38168	1
1	34848080	16066	16098	28697	28755	28547	30388	LIV5	97124	97074	34449	34474	38168	0
1	34965988	16066	16098	28697	28755	28547	30388	LIV5	L142	97074	34449	34474	38168	1
1	34967716	16066	16098	28697	28547	30388	LIV5	L142	34449	34474	38168	0
1	34995894	16066	16098	28697	28755	28547	30388	LIV5	L142	97124	97074	34449	34474	38168	0
1	35027633	16066	16098	28697	28755	28547	30388	LIV5	L142	97124	97074	34449	34474	38168	1
1	35125323	16066	16098	28697	28755	28547	30388	LIV5	L142	97124	97074	34449	34474	38168	1
1	35177341	16066	16098	28697	28755	28547	30388	LIV5	L142	97124	97074	34449	34474	38168	0
1	35196500	16066	16098	28697	28755	28547	30388	LIV5	L142	97124	97074	34449	34474	38168	1
1	35267418	16066	16098	28697	28755	28547	30388	LIV5	L142	97124	97074	34474	38168	0
1	35336216	16066	28755	97074	34449	34474	38168	1
1	35374546	16066	16098	28697	28755	LIV5	L142	97124	97074	34474	38168	0
1	35398322	16098	28697	28755	28547	30388	LIV5	L142	97124	97074	34449	34474	38168	0
1	35403356	16066	16098	28697	28755	28547	30388	LIV5	L142	97124	97074	34449	34474	38168	1
1	35429014	28547	30388	LIV5	L142	97124	97074	34449	34474	38168	1
1	35453092	16066	16098	28697	28755	28547	30388	LIV5	L142	97124	97074	34449	34474	38168	0
1	35469748	16066	16098	28697	28755	28547	30388	LIV5	L142	97124	97074	34449	34474	38168	1
1	35472862	16066	16098	28697	30388	97124	34449	34474	38168	1
1	35494615	16066	16098	28755	30388	LIV5	34449	34474	38168	1
1	35520952	16066	28755	28547	30388	LIV5	L142	97124	97074	34449	34474	38168	0
1	35530611	16066	16098	28697	28755	28547	30388	LIV5	L142	97124	97074	34449	34474	38168	1
1	35535506	16066	16098	28697	28755	28547	30388	LIV5	L142	97124	97074	34449	34474	38168	1
1	35610391	16066	16098	28697	28755	28547	30388	LIV5	L142	97124	97074	34449	34474	38168	1
1	35617560	16066	16098	28697	28755	28547	30388	LIV5	L142	97124	97074	34449	34474	38168	1
1	35629549	16066	16098	28697	28755	28547	30388	LIV5	L142	97124	97074	34449	34474	38168	1
1	35630929	16066	16098	28697	28755	28547	30388	L142	97124	97074	34449	34474	38168	1
1	35697951	16066	16098	28697	28547	30388	LIV5	L142	97124	97074	34449	34474	38168	1
1	35752856	16066	16098	28697	28755	28547	30388	LIV5	L142	97124	97074	34449	34474	38168	1
1	35799774	16066	16098	28697	28755	L142	34449	34474	38168	1
1	35818298	16066	16098	28697	28755	28547	30388	34449	38168	0
1	36177503	16066	16098	28697	28755	28547	30388	LIV5	L142	97124	97074	34449	34474	38168	1
1	36545046	16066	28697	28755	28547	30388	LIV5	L142	97124	97074	34449	34474	38168	0
1	36604019	16066	16098	28697	28755	28547	30388	LIV5	L142	97124	97074	34449	34474	38168	0
1	36621082	16066	16098	28697	28755	28547	30388	LIV5	L142	97124	97074	34449	34474	38168	0
1	36724947	16066	16098	28697	28755	28547	30388	LIV5	L142	97124	97074	34449	34474	38168	1
1	36726387	16066	16098	28697	28755	28547	30388	LIV5	L142	97124	97074	34449	34474	38168	0
1	36786962	16066	16098	28697	28755	28547	30388	LIV5	L142	97124	97074	34449	34474	38168	0
1	36836131	16066	16098	28697	28755	28547	30388	LIV5	L142	97124	97074	34449	34474	38168	0
1	36883991	16066	28755	28547	30388	L142	97124	97074	34449	34474	38168	1
1	36962346	16066	16098	28697	28755	28547	30388	LIV5	L142	97124	97074	34449	34474	38168	0
1	37023475	16066	16098	28697	28755	28547	30388	LIV5	L142	97124	97074	34449	34474	38168	0
1	37034793	16066	16098	28697	28755	28547	30388	LIV5	L142	97124	97074	34449	34474	38168	0
1	37053307	16066	16098	28697	28755	28547	30388	LIV5	L142	97124	97074	34449	34474	38168	0
1	37107814	16066	16098	28697	28755	28547	30388	LIV5	L142	97124	97074	34449	34474	38168	0
1	37189139	16066	16098	28697	28755	28547	30388	LIV5	L142	97074	34449	34474	38168	1
1	37192271	16066	16098	28697	28755	28547	30388	LIV5	97124	97074	34449	34474	38168	0
1	37448578	16066	16098	28697	28547	30388	LIV5	L142	97124	97074	34449	34474	38168	1
1	37506258	16066	16098	28697	28755	28547	30388	L142	97124	97074	34449	34474	38168	1
1	37625318	16066	16098	28697	28755	28547	30388	LIV5	L142	97124	97074	34449	34474	38168	1
1	37974485	16066	16098	28697	34449	34474	38168	1
1	38043373	16066	16098	28697	28755	28547	30388	LIV5	L142	97124	97074	34449	34474	38168	0
1	38086326	16066	16098	L142	97124	34449	38168	1
1	38184275	16066	16098	28697	28755	28547	30388	LIV5	L142	97124	97074	34449	34474	38168	0
1	38315459	16066	16098	28697	28755	28547	30388	LIV5	L142	97124	97074	34449	34474	38168	1
1	38411409	16066	16098	28697	28755	28547	30388	LIV5	L142	97124	97074	34449	34474	38168	0
1	38441190	16098	28755	30388	L142	97124	97074	34449	34474	38168	1
1	38442339	LIV5	34449	38168	1
1	38443912	16098	28755	28547	30388	97074	34449	38168	1
1	38459020	16066	16098	28697	28547	30388	LIV5	L142	97124	97074	34449	34474	38168	0
1	38519179	16098	34449	34474	38168	1
1	38562179	16066	16098	28697	28755	28547	30388	LIV5	L142	34474	38168	1
1	38622675	16066	16098	28697	28755	28547	30388	LIV5	L142	97124	97074	34449	34474	38168	1
1	38636549	16066	16098	28697	28755	28547	30388	LIV5	L142	97124	97074	34449	34474	38168	1
1	38638192	16066	16098	28697	28755	LIV5	L142	97124	34449	34474	38168	1
1	38645519	16066	16098	28697	28547	30388	LIV5	97124	97124	97074	34449	34474	38168	0
1	38692659	16066	16098	28697	28547	30388	LIV5	L142	97124	97074	34449	34474	38168	1
1	38747530	L142	34449	34474	38168	1
1	38858934	16066	16098	28697	28755	38168	1
1	38894557	16066	16098	28697	28755	28547	30388	LIV5	L142	97124	97074	34449	34474	38168	0
1	38998355	16066	16098	28697	28755	LIV5	L142	97124	97074	34449	34474	38168	0
1	39038769	16098	28697	28755	28547	30388	LIV5	L142	97124	97074	34449	34474	38168	1
1	39061505	16098	28697	28755	28547	L142	34474	38168	0
1	39074573	16066	L142	34449	34474	38168	0
1	39113800	16066	16098	28697	28755	28547	30388	LIV5	L142	97124	97074	34449	34474	38168	1
1	39147306	16066	16098	28697	28755	28547	30388	LIV5	L142	97124	97074	34449	34474	38168	1
1	39150032	16066	16098	28697	28755	28547	30388	LIV5	L142	97074	34449	34474	38168	1
1	39305612	16066	16098	28697	28755	28547	97074	34449	38168	1
1	39348139	97124	97074	38168	1
1	39375848	16066	16098	28697	28755	28547	30388	LIV5	L142	97124	97074	34449	34474	38168	0
1	39382973	16066	16098	28697	28755	28547	30388	LIV5	L142	97124	97074	34449	34474	38168	1
1	39385450	16066	16098	28697	28755	28547	30388	LIV5	L142	97124	97074	34449	34474	38168	0
1	39494723	28697	28755	30388	34449	34474	38168	0
1	39524507	16066	16098	28697	28755	28547	30388	LIV5	L142	97124	97074	34449	34474	38168	0
1	39560793	16066	16098	28697	28755	28547	30388	LIV5	L142	97124	97074	34449	34474	38168	1
1	39570318	16066	16098	28697	28755	28547	30388	LIV5	L142	97124	97074	34449	34474	38168	0
1	39646836	16066	28697	28755	28547	30388	LIV5	97074	34449	34474	38168	1
1	39698132	16066	16098	28697	28755	28547	30388	LIV5	L142	97124	97074	34449	34474	38168	0
1	39757512	16066	16098	28697	28755	28547	30388	LIV5	L142	97124	97074	34449	34474	38168	1
1	39778902	16066	16098	28697	28755	28547	30388	LIV5	L142	97124	97074	34449	34474	38168	1
1	39794501	16066	16098	28697	28755	28547	30388	LIV5	L142	97124	97074	34449	34474	38168	1
1	39822396	16066	16098	28697	28547	30388	LIV5	L142	97124	97074	38168	0
1	39880853	16066	16098	28697	28547	30388	LIV5	L142	97124	97074	34449	34474	38168	0
1	40007335	16066	16098	28697	28755	30388	LIV5	34449	34474	38168	1
1	40076959	16066	16098	28697	28755	28547	30388	LIV5	L142	97124	97074	34449	34474	38168	0
1	40080165	16066	16098	28697	28755	28547	30388	LIV5	L142	97124	97074	34449	34474	38168	0
1	40533684	16066	16098	28697	28755	28547	30388	LIV5	L142	97124	34449	34474	38168	0
1	40566717	16066	16098	28697	28755	28547	30388	LIV5	L142	97124	34449	34474	38168	0
1	40875422	16066	16098	28697	28755	28547	30388	34449	38168	1
1	40989487	16066	16098	28697	28755	28547	30388	LIV5	L142	97124	97074	34449	34474	38168	0
1	41293305	16066	16098	28697	28755	28547	L142	97074	34449	34474	38168	0
1	41296923	28697	28547	30388	LIV5	L142	97124	97074	34449	34474	38168	0
1	41486577	16066	16098	28697	28755	28547	30388	LIV5	L142	97124	97074	34449	34474	38168	1
1	41541147	28547	30388	LIV5	L142	97124	97074	38168	1
1	41563364	16066	16098	28697	28755	28547	30388	LIV5	L142	97124	97074	34449	34474	38168	0
1	41570642	16066	16098	28697	28755	28547	30388	LIV5	L142	97124	97074	34449	34474	38168	0
1	41575840	16066	16098	28697	28755	28547	30388	LIV5	L142	97124	97074	34449	34474	38168	0
1	41623891	16066	16098	28697	28755	28547	30388	LIV5	L142	34449	34474	38168	0
1	41676763	16066	16098	28697	28755	28547	30388	LIV5	L142	97124	97074	34449	34474	38168	1
1	41747285	16066	16098	28697	28755	28547	30388	LIV5	L142	97074	34449	34474	38168	0
1	41804302	28547	30388	97124	38168	1
1	41941824	16098	28547	34449	38168	0
1	41976981	16066	16098	28697	28755	28547	30388	LIV5	L142	97124	97074	34449	34474	38168	0
1	42062174	16066	16098	28697	28755	30388	LIV5	L142	97124	97074	34449	34474	38168	0
1	42072314	16066	16098	28697	28755	28547	30388	LIV5	L142	97124	97074	34449	34474	38168	1
1	42100740	28547	30388	L142	34449	38168	1
1	42144356	16066	16098	28697	28547	30388	LIV5	L142	97124	97074	34449	34474	38168	1
1	42174733	16066	16098	28697	28755	28547	30388	LIV5	L142	97124	97074	34449	34474	38168	0
1	42360666	16066	16098	28697	28755	LIV5	L142	97124	97074	34449	34474	38168	1
1	42368791	16066	16098	28697	28755	28547	30388	LIV5	L142	97124	34449	34474	38168	0
1	42391314	30388	97074	34449	38168	1
1	42398577	L142	34449	34474	38168	0
1	42434789	16066	16098	28697	28755	28547	30388	LIV5	L142	97124	97074	34449	34474	38168	0
1	42536280	16066	16098	28697	28755	28547	30388	LIV5	L142	97124	97074	34449	34474	38168	1
1	42551942	16066	30388	L142	97074	34449	34474	38168	0
1	42639563	16066	16098	28697	28755	28547	97124	97074	34449	34474	38168	1
1	42645703	16066	16098	28697	28755	28547	30388	LIV5	L142	97124	97074	34449	34474	38168	0
1	42676478	16066	16098	28697	28755	28547	30388	LIV5	L142	97124	97074	34449	34474	38168	1
1	42761739	16066	16098	28697	28547	30388	LIV5	L142	97124	97074	34449	34474	38168	1
1	42819777	16066	16098	28697	28755	28547	30388	LIV5	L142	97124	97074	34449	34474	38168	0
1	42851251	16066	16098	28697	28755	28547	30388	LIV5	L142	97124	97074	34449	34474	38168	0
1	42865061	16066	16098	28697	28755	28547	30388	LIV5	L142	97124	97074	34449	34474	38168	1
1	42953961	16098	28697	28547	30388	LIV5	L142	97124	97074	34449	34474	38168	1
1	42963249	16066	16098	28697	28755	28547	30388	LIV5	L142	97124	97074	34449	34474	38168	0
1	43130598	16066	16098	28697	28755	28547	30388	LIV5	L142	97124	97074	34449	34474	38168	1
1	43135617	16066	16098	28697	28755	28547	30388	LIV5	L142	97124	97074	34449	34474	38168	1
1	43149267	16066	16098	28697	28755	30388	97124	97074	34449	34474	38168	1
1	43155329	28697	28755	28547	30388	LIV5	L142	97074	34449	34474	38168	0
1	43343468	16066	16098	28697	28755	28547	30388	LIV5	L142	97124	97074	34449	34474	38168	0
1	43378557	16066	16098	28697	28755	28547	30388	LIV5	L142	97124	97074	34449	34474	38168	0
1	43428266	16066	28697	28755	28547	30388	LIV5	L142	97124	97074	34449	34474	38168	0
1	43528771	16066	16098	28697	28755	28547	30388	LIV5	L142	97124	97074	34449	34474	38168	0
1	43532625	16066	16098	28697	28755	28547	30388	LIV5	L142	97124	97074	34449	34474	38168	0
1	43719172	34449	34474	38168	1
1	43743711	16066	16098	28697	28755	28547	30388	LIV5	L142	97124	97074	34449	34474	38168	1
1	43745299	16066	16098	28697	28755	28547	30388	LIV5	L142	97124	97074	34449	34474	38168	1
1	43830282	16066	16098	28697	28755	28547	30388	LIV5	L142	97124	97074	34449	34474	38168	0
1	43912282	16066	16098	28697	28755	28547	30388	LIV5	L142	97124	97074	34449	34474	38168	0
1	44017733	16066	16098	28697	28755	28547	30388	LIV5	97124	97074	34449	34474	38168	0
1	44115999	16066	16098	28697	28755	28547	30388	LIV5	L142	97124	97074	34449	34474	38168	1
1	44145326	16066	16098	28697	28755	28547	30388	LIV5	L142	97124	97074	34449	34474	38168	1
1	44148481	16066	16098	28697	28755	28547	30388	LIV5	L142	97124	97074	34449	34474	38168	1
1	44220325	16066	16098	28697	28755	28547	30388	LIV5	L142	97124	97074	34449	34474	38168	1
1	44253259	16066	16098	28697	28755	LIV5	L142	97124	34449	34474	38168	0
1	44315719	16098	28755	28547	30388	L142	97124	34449	34474	38168	1
1	44337341	16066	16098	28697	28755	LIV5	L142	97124	97074	34449	34474	38168	1
1	44357352	16066	16098	28697	28755	LIV5	L142	97124	97074	34449	34474	38168	0
1	44359238	16066	16098	28697	28755	28547	30388	LIV5	L142	97124	97074	34449	34474	38168	0
1	44413076	16066	16098	28697	28755	28547	30388	LIV5	L142	97124	97074	34449	34474	38168	1
1	44459292	16066	16098	28697	28755	34449	34474	38168	0
1	44475393	16098	28697	28755	28547	30388	LIV5	L142	97124	97074	38168	1
1	44497381	16066	16098	28697	28755	28547	30388	LIV5	L142	97124	97074	34449	34474	38168	1
1	44514759	16066	16098	28697	28755	28547	30388	LIV5	L142	97124	97074	34449	34474	38168	0
1	44542569	16098	28697	28755	28547	30388	LIV5	L142	97124	97074	34449	34474	38168	0
1	44543554	16066	16098	28755	28547	30388	97124	97074	34449	34474	38168	1
1	44566530	28547	30388	38168	0
1	44805280	16066	16098	28697	L142	97074	34449	34474	38168	0
1	44853805	16066	16098	28697	28755	28547	30388	LIV5	L142	97124	97074	34449	34474	38168	1
1	44899465	16066	16098	28697	28755	28547	30388	LIV5	L142	97124	34449	38168	1
1	44900408	16066	16098	28697	28755	28547	30388	LIV5	L142	97124	97074	34449	34474	38168	1
1	45004036	16066	16098	28697	28755	28547	30388	LIV5	L142	97124	97074	34449	34474	38168	1
1	45012517	16066	16098	28697	28755	28547	30388	LIV5	L142	97124	97074	34449	34474	38168	0
1	45069024	16066	16098	28697	28755	28547	30388	LIV5	L142	97124	97074	34449	34474	38168	0
1	45140213	16066	16098	28697	28755	28547	30388	LIV5	L142	97124	97074	34449	34474	38168	1
1	45236916	16066	16098	28697	28755	28547	30388	LIV5	L142	97124	97074	34449	34474	38168	0
1	45238430	16066	16098	28697	28755	28547	30388	LIV5	L142	97124	97074	34449	34474	38168	1
1	45308813	28697	28755	97074	34449	34474	38168	1
1	45311671	16066	16098	28697	28755	28547	30388	LIV5	L142	97124	97074	34449	34474	38168	0
1	45322357	16066	16098	28697	28755	28547	30388	LIV5	L142	97124	97074	34449	34474	38168	0
1	45387233	16066	16098	28697	28755	28547	30388	LIV5	L142	97124	97074	34449	34474	38168	1
1	45521497	16098	30388	97074	34449	34474	38168	0
1	45610385	16066	16098	28697	28755	28547	30388	LIV5	L142	97124	97074	34474	38168	0
1	45675803	28697	28755	28547	LIV5	97124	38168	0
1	45750136	16066	16098	28697	28755	28547	30388	LIV5	L142	97124	97074	34449	34474	38168	0
1	45901276	LIV5	L142	97124	97074	38168	0
1	45914685	16066	16098	28697	28755	28547	30388	LIV5	L142	97124	97074	34449	34474	38168	1
1	45953966	16066	16098	28697	28755	34449	38168	0
1	45982787	16066	16098	28697	28755	28547	30388	LIV5	L142	97124	97074	34449	34474	38168	0
1	45982954	16066	16098	28697	28755	28547	30388	LIV5	L142	97124	97074	34449	34474	38168	1
1	45990570	16066	16098	28697	28755	28547	30388	LIV5	L142	97124	97074	34449	34474	38168	1
1	46029940	16066	16098	28697	28755	28547	30388	LIV5	L142	97124	97074	34449	34474	38168	1
1	46229521	16066	16098	28697	28755	28547	30388	LIV5	L142	97124	97074	34449	34474	38168	1
1	46261412	16066	16098	28697	28755	28547	30388	LIV5	L142	97124	97074	34449	34474	38168	0
1	46269155	16066	16098	28697	28755	28547	30388	LIV5	L142	97124	97074	34449	34474	38168	1
1	46780370	16066	16098	28697	28755	28547	30388	LIV5	L142	97124	97074	34449	34474	38168	0
1	46781887	16066	16098	28697	28755	28547	30388	LIV5	L142	97124	34449	34474	38168	0
1	46798338	16066	16098	28697	28755	28547	30388	LIV5	L142	97124	34449	34474	38168	1
1	46800164	16066	16098	28697	28755	28547	30388	LIV5	L142	97124	97074	34449	34474	38168	0
1	46806331	16066	16098	28697	28755	28547	30388	LIV5	L142	97124	97074	34449	34474	38168	0
1	46830580	16098	28547	30388	97124	97074	34449	34474	38168	0
1	46971988	16066	16098	28697	28755	28547	30388	LIV5	L142	97124	97074	34449	34474	38168	1
1	47428072	16066	16098	28697	28755	28547	30388	LIV5	L142	97124	97074	34449	34474	38168	1
1	47663503	16098	L142	38168	0
1	47775154	16098	28697	28755	28547	30388	LIV5	L142	97124	34474	38168	0
1	47776184	16066	16098	28697	28755	28547	30388	LIV5	L142	97124	97074	34449	34474	38168	1
1	47865884	16066	16098	28697	28755	28547	30388	LIV5	L142	97124	97074	34449	34474	38168	1
1	48457494	16066	16098	28697	28755	28547	30388	LIV5	L142	97124	97074	34449	34474	38168	0
1	48708280	16066	16098	28697	28755	28547	30388	LIV5	L142	97124	97074	34449	34474	38168	0
1	48835085	16066	16098	28697	28755	28547	30388	LIV5	L142	97124	97074	34449	34474	38168	0
1	48943831	16098	28547	30388	97124	34449	34474	38168	0
1	49021125	16066	16098	28697	28755	28547	30388	LIV5	L142	97124	97074	34449	34474	38168	0
1	49138018	16066	16098	28697	28755	28547	30388	LIV5	L142	97074	34449	34474	38168	0
1	49356832	16066	16098	28697	28755	28547	30388	LIV5	97074	34449	34474	38168	0
1	49410066	16066	16098	28697	28755	28547	30388	LIV5	L142	97124	97074	34449	34474	38168	0
1	49471924	16066	16098	28697	28755	28547	30388	LIV5	L142	97124	97074	34449	34474	38168	0
1	49568714	16066	16098	28755	LIV5	L142	97074	38168	0
1	49758824	16066	16098	28697	28755	28547	30388	LIV5	L142	97124	97074	34449	34474	38168	1
1	49890659	28547	34449	38168	0
1	49999634	16066	16098	28697	28755	28547	30388	LIV5	L142	97124	97074	34449	34474	38168	0
1	50049301	16066	16098	28697	28755	28547	30388	LIV5	L142	97124	97074	34449	34474	38168	0
1	50091490	16066	16098	28697	28755	28547	30388	LIV5	L142	97124	97074	34449	34474	38168	0
1	50334086	16066	16098	28697	28755	28547	30388	LIV5	L142	97124	97074	34449	34474	38168	0
1	50438483	34449	34474	38168	0
1	50634511	LIV5	97124	97074	38168	1
1	50839997	16066	16098	28697	28755	28547	30388	LIV5	L142	97124	97074	34449	34474	38168	1
1	50870901	16066	16098	28697	28755	28547	30388	LIV5	L142	97124	97074	34449	34474	38168	1
1	50947253	16066	16098	28697	28755	28547	30388	LIV5	L142	97124	97074	34449	34474	38168	0
1	50981814	16066	16098	28547	LIV5	L142	97124	97074	34449	34474	38168	1
1	50999213	16066	16098	28697	28755	28547	30388	LIV5	L142	97124	97074	34449	34474	38168	1
1	51047117	16066	16098	28697	28755	28547	30388	LIV5	L142	97124	97074	34449	34474	38168	1
1	51188834	16066	16098	28697	28547	30388	LIV5	L142	97124	34449	34474	38168	1
1	51383108	16066	16098	28697	28755	28547	30388	LIV5	L142	97124	97074	34449	34474	38168	0
1	51460045	28697	LIV5	L142	34449	34474	38168	1
1	51471921	16066	16098	28697	28755	28547	30388	LIV5	L142	97124	97074	34449	34474	38168	1
1	51479980	16098	28697	28547	30388	LIV5	97124	97074	34449	38168	1
1	51656199	16066	16098	28697	28755	28547	30388	LIV5	L142	34449	34474	38168	1
1	51719895	16098	28697	28755	28547	30388	L142	97074	34449	34474	38168	1
1	51802589	16066	16098	28697	28547	L142	97124	34449	38168	1
1	51858469	16066	16098	28697	28755	28547	30388	LIV5	L142	97124	97074	34449	34474	38168	1
1	51870509	16098	28697	28755	34449	34474	38168	1
1	51877113	16066	16098	28697	28755	28547	30388	LIV5	L142	97124	97074	34449	34474	38168	1
1	51902375	16066	16098	28697	28755	28547	30388	LIV5	L142	97124	97074	34449	34474	38168	1
1	51951167	16066	16098	28697	28755	28547	30388	LIV5	L142	97124	97074	34449	34474	38168	1
1	52004522	16066	28697	28755	28547	30388	LIV5	L142	97074	34449	34474	38168	0
1	52047101	16066	16098	28697	28755	97124	34449	34474	38168	1
1	52146848	16098	28697	28547	30388	LIV5	L142	97124	97074	34449	34474	38168	1
1	52159409	16066	16098	28697	28755	28547	30388	LIV5	L142	97124	97074	34449	34474	38168	0
1	52191321	16066	16098	28697	28755	28547	30388	LIV5	L142	97124	97074	34449	34474	38168	1
1	52254656	16066	16098	28697	28755	28547	30388	LIV5	L142	97124	97074	34449	34474	38168	0
1	52277169	16066	16098	28697	28755	28547	30388	LIV5	L142	97124	97074	34449	34474	38168	0
1	52299795	16066	16098	28697	28755	28547	30388	LIV5	L142	97124	97074	34449	34474	38168	0
1	52301005	16098	28697	28755	28547	30388	LIV5	L142	97124	97074	34449	34474	38168	1
1	52328499	16066	16098	28697	28755	28547	30388	LIV5	L142	97124	97074	34449	34474	38168	0
1	52361104	16066	16098	28697	28755	28547	30388	LIV5	L142	97124	97074	34449	34474	38168	1
1	52391621	16066	16098	28697	28755	28547	30388	LIV5	L142	97124	97074	34449	34474	38168	0
1	52428634	16066	16098	28697	28755	28547	30388	LIV5	L142	97124	97074	34449	34474	38168	1
1	52489688	16066	16098	28697	28755	28547	30388	LIV5	L142	97124	97074	34449	34474	38168	0
1	52506310	16066	16098	28697	28755	28547	30388	LIV5	L142	97124	97074	34449	34474	38168	1
1	52514086	16066	16098	28697	28755	28547	30388	LIV5	L142	97124	97074	34449	34474	38168	1
1	52598018	16066	16098	28697	28755	28547	30388	LIV5	L142	97124	97074	34449	34474	38168	1
1	52658820	34449	34474	38168	1
1	52661120	16066	16098	28697	28755	28547	30388	LIV5	L142	97124	97074	34449	34474	38168	1
1	52857656	16098	28697	28755	34449	34474	38168	0
1	52998470	16066	16098	28697	28755	28547	30388	LIV5	L142	97124	97074	34449	34474	38168	1
1	53001802	16066	16098	28697	28755	28547	30388	LIV5	L142	97124	97074	34449	34474	38168	1
1	53201957	16066	16098	28697	28755	28547	30388	LIV5	L142	97124	97074	34449	34474	38168	0
1	53258467	16066	16098	28697	28755	28547	30388	LIV5	L142	97124	97074	34449	34474	38168	0
1	53404217	16066	16098	28697	28755	28547	30388	LIV5	L142	97124	97074	34449	34474	38168	1
1	53686486	16066	16098	28697	28547	30388	L142	34449	34474	38168	0
1	53737420	16066	16098	28697	28755	28547	30388	LIV5	L142	97124	97074	34449	34474	38168	0
1	53758587	16066	16098	28697	28755	28547	30388	LIV5	L142	97124	97074	34449	34474	38168	1
1	53761659	28697	28755	28547	30388	LIV5	L142	97124	97074	34449	34474	38168	0
1	53801398	16066	16098	28697	28755	28547	30388	LIV5	L142	97124	97074	34449	34474	38168	0
1	53825150	16066	16098	28697	28755	28547	30388	LIV5	L142	97124	97074	34449	34474	38168	0
1	53856659	16066	16098	28697	28755	28547	30388	LIV5	L142	97124	97074	34449	34474	38168	0
1	53943734	16066	16098	28697	28547	30388	LIV5	L142	97124	97074	38168	0
1	54138734	16066	16098	28697	28755	28547	30388	LIV5	L142	97124	97074	34449	34474	38168	0
1	54142966	L142	97124	97074	38168	0
1	54161878	16066	16098	28697	28755	34449	34474	38168	1
1	54197213	16066	16098	28697	28755	28547	30388	97124	97074	34449	34474	38168	0
1	54307279	28547	30388	LIV5	L142	97074	34449	34474	38168	1
1	54398961	16066	16098	28697	28755	28547	30388	LIV5	L142	97124	97074	34449	34474	38168	0
1	54406507	16066	16098	28547	LIV5	L142	97124	97074	34449	34474	38168	0
1	54595952	16066	16098	28697	28755	28547	30388	LIV5	L142	97124	97074	34449	34474	38168	0
1	54622530	16066	16098	28697	28755	28547	30388	LIV5	L142	97124	97074	34449	34474	38168	0
1	55089830	34449	34474	38168	0
1	55427842	16066	30388	34474	38168	0
1	55974396	16066	16098	28697	28755	28547	30388	LIV5	L142	97124	97074	34449	34474	38168	0
1	56056071	16098	28697	28755	28547	30388	LIV5	97074	34449	34474	38168	1
1	56091750	28697	28547	97074	38168	1
1	56216788	28697	28755	LIV5	34449	38168	1
1	56220339	28547	30388	97124	97074	38168	0
1	56271529	16066	16098	28697	28755	28547	30388	LIV5	L142	97124	97074	34449	34474	38168	1
1	56326355	16066	16098	28697	28755	28547	30388	LIV5	L142	97124	97074	34449	34474	38168	0
1	56653412	16066	16098	28697	28755	28547	30388	LIV5	L142	97124	97074	34449	34474	38168	1
1	57091205	16066	16098	28697	28755	28547	30388	LIV5	L142	97074	34449	34474	38168	0
1	57103095	16066	16098	28697	LIV5	L142	97124	97074	34449	34474	38168	0
1	57116303	16066	16098	28697	28755	28547	30388	LIV5	L142	97124	97074	34449	34474	38168	0
1	57323693	16066	16098	28697	28755	28547	30388	LIV5	L142	97124	97074	34449	34474	38168	1
1	57367736	16098	28697	28755	38168	0
1	57750788	16066	16098	28697	28547	30388	LIV5	97124	97074	34449	34474	38168	1
1	58149881	28697	28755	28547	30388	L142	97124	97074	34449	38168	0
1	58272240	16066	16098	28697	28755	28547	30388	LIV5	L142	97124	97074	38168	1
1	58321933	16066	16098	28697	28755	28547	30388	LIV5	L142	97124	97074	34449	34474	38168	0
1	58385542	16066	16098	28697	28755	28547	30388	LIV5	L142	97124	34449	34474	38168	1
1	59179938	16098	28697	28755	28547	30388	LIV5	L142	97124	97074	34449	34474	38168	1
1	59305730	16066	34449	38168	1
1	59539187	16066	28697	28755	28547	30388	LIV5	L142	97124	97074	34449	34474	38168	0
1	59900694	16066	16098	28697	28755	28547	30388	LIV5	L142	34449	34474	38168	0
1	60077056	97074	34449	34474	38168	1
1	60246174	16098	28697	30388	LIV5	L142	34449	34474	38168	1
1	60396910	16066	16098	28697	28755	28547	30388	L142	97124	97074	34449	34474	38168	0
1	60520869	28547	30388	97074	34474	38168	0
1	60660049	16066	16098	28697	28755	28547	30388	LIV5	L142	97124	97074	34449	34474	38168	0
1	60839685	16066	16098	28697	28755	28547	30388	LIV5	L142	97124	97074	34449	34474	38168	0
1	60893781	16066	16098	28697	28755	34449	34474	38168	0
1	61021090	30388	L142	97124	38168	1
1	61160343	30388	LIV5	L142	34449	34474	38168	1
1	61195333	16066	16098	28697	28755	28547	30388	LIV5	L142	97124	97074	34449	34474	38168	1
1	61315919	16066	16098	28697	28755	28547	30388	LIV5	L142	97124	97074	34449	34474	38168	0
1	61414221	34449	34474	38168	0
1	61446566	16066	16098	28697	28755	28547	30388	LIV5	L142	97124	97074	34449	34474	38168	1
1	61505754	16066	16098	28697	28755	28547	30388	LIV5	L142	97124	97074	34449	34474	38168	1
1	61599699	16066	16098	28697	28755	28547	30388	LIV5	L142	97124	97074	34449	34474	38168	1
1	61724875	16066	16098	28697	28755	28547	30388	LIV5	L142	97124	97074	34449	34474	38168	0
1	61807597	LIV5	L142	97074	38168	0
1	61837264	16066	16098	28697	34449	38168	0
1	61841247	16066	16098	28697	28755	28547	30388	LIV5	L142	97124	97074	34449	34474	38168	0
1	61879621	16066	16098	28697	28547	30388	LIV5	L142	97124	97074	34449	34474	38168	0
1	61899565	16066	16098	28697	28755	28547	30388	LIV5	L142	97124	97074	34449	34474	38168	1
1	61903949	28697	28755	38168	0
1	61913864	16098	28697	28755	38168	0
1	61959564	16066	16098	28697	28755	28547	30388	LIV5	L142	97124	97074	34449	34474	38168	0
1	62061405	16066	16098	28697	28755	28547	30388	LIV5	L142	97124	97074	34449	34474	38168	0
1	62087745	16066	16098	28697	28755	LIV5	L142	97124	97074	34449	34474	38168	0
1	62352844	16066	16098	28697	28755	28547	30388	LIV5	L142	97124	97074	34449	34474	38168	0
1	62408747	LIV5	97124	97074	38168	1
1	62417420	16066	16098	28697	28755	28547	30388	LIV5	L142	97124	97074	34449	34474	38168	1
1	62477374	16066	16098	28697	28755	28547	30388	LIV5	L142	97124	97074	34449	34474	38168	1
1	62485664	16066	16098	28697	28755	28547	30388	LIV5	L142	97124	97074	34449	34474	38168	0
1	62511357	16066	16098	28697	28755	30388	LIV5	L142	97124	97074	34449	34474	38168	1
1	62604686	16066	16098	28697	28755	28547	30388	LIV5	L142	97124	97074	34449	34474	38168	1
1	62658221	16066	16098	28697	28755	28547	30388	LIV5	L142	97124	97074	34474	38168	0
1	62724928	97124	97074	38168	0
1	62842284	16066	28697	28755	38168	0
1	62874954	16066	16098	28697	28755	28547	30388	LIV5	L142	97124	97074	34449	34474	38168	0
1	62885315	16066	16098	28697	28755	28547	30388	LIV5	L142	97124	97074	34449	34474	38168	0
1	62903959	16066	16098	28697	28755	28547	30388	LIV5	L142	97124	97074	34449	38168	0
1	62918281	16066	16098	28697	28755	28547	30388	LIV5	L142	97124	97074	34449	34474	38168	1
1	62987170	16066	16098	28697	28755	28547	30388	LIV5	L142	97124	97074	34449	34474	38168	0
1	62999218	16066	16098	28697	28755	28547	30388	LIV5	L142	97124	97074	34449	34474	38168	0
1	63054432	16066	16098	28697	28755	28547	30388	LIV5	L142	97124	97074	34449	34474	38168	1
1	63099351	28547	30388	LIV5	L142	97124	97074	34449	34474	38168	0
1	63139743	16066	16098	28697	28755	28547	30388	LIV5	L142	97124	34449	34474	38168	0
1	63173586	16066	16098	28697	28755	28547	30388	LIV5	L142	97124	97074	34449	34474	38168	0
1	63496632	28547	LIV5	97074	34449	38168	1
1	63725907	16066	16098	28697	28755	28547	30388	LIV5	L142	97124	97074	34449	34474	38168	0
1	63891485	16066	16098	28697	28755	28547	30388	LIV5	L142	97124	97074	34449	34474	38168	1
1	63989589	16066	16098	28697	28547	30388	LIV5	L142	97124	97074	34449	34474	38168	1
1	64223505	16066	16098	28697	28755	28547	30388	LIV5	L142	97124	97074	34449	34474	38168	1
1	64230466	16066	16098	28697	28755	28547	30388	LIV5	L142	97124	97074	34449	34474	38168	0
1	64372994	16098	28697	28755	28547	30388	LIV5	L142	97124	97074	34449	34474	38168	1
1	64396873	16066	16098	28697	28547	30388	L142	97074	34474	38168	1
1	64588621	16066	16098	28697	28755	28547	30388	LIV5	L142	97124	97074	34449	34474	38168	1
1	64596622	16098	28697	28755	28547	30388	LIV5	L142	97124	97074	34449	34474	38168	1
1	64661295	16098	28697	28755	28547	30388	LIV5	97124	97074	34474	38168	1
1	64704361	16066	16098	28697	28755	28547	30388	LIV5	L142	97124	97074	34449	34474	38168	0
1	65355224	16066	LIV5	97124	34449	34474	38168	0
1	65467212	16066	16098	28697	28755	28547	30388	LIV5	L142	97124	97074	34449	34474	38168	0
1	65519508	16098	28697	28755	28547	30388	LIV5	L142	97124	97074	34449	34474	38168	0
1	66503926	16066	16098	28697	28755	28547	30388	LIV5	L142	97124	97074	34449	34474	38168	0
1	66908598	16066	16098	28697	28755	28547	30388	LIV5	L142	97124	97074	34449	34474	38168	0
1	66950303	LIV5	34449	34474	38168	1
1	67214193	16066	16098	28697	28755	28547	30388	LIV5	L142	97124	97074	34449	34474	38168	0
1	67254785	16066	16098	28697	28755	28547	30388	LIV5	L142	97124	97074	34449	34474	38168	0
1	67290257	97124	97074	38168	0
1	67400127	16066	16098	28697	28755	28547	30388	LIV5	L142	97124	97074	34449	34474	38168	1
1	67570323	16066	16098	28697	28755	28547	30388	LIV5	L142	97124	97074	34449	34474	38168	0
1	67618193	16066	16098	28697	28755	28547	30388	LIV5	L142	97124	97074	34449	34474	38168	1
1	68052862	16066	16098	28755	28547	30388	LIV5	L142	97124	97074	34449	34474	38168	1
1	68183405	16066	16098	28697	28755	28547	30388	LIV5	L142	97124	97074	34449	34474	38168	0
1	68607927	16098	28697	34449	34474	38168	0
1	68610100	16066	16098	28697	28755	28547	30388	LIV5	L142	97124	97074	34449	34474	38168	0
1	68640505	16066	28697	28755	28547	30388	LIV5	L142	97124	97074	34449	34474	38168	0
1	69090205	16066	16098	28697	28755	28547	30388	LIV5	L142	97124	97074	34449	34474	38168	1
1	69206131	16066	16098	28547	30388	LIV5	L142	97124	97074	34449	34474	38168	0
1	69536705	16066	16098	28697	28755	28547	30388	LIV5	L142	97124	97074	34449	34474	38168	0
1	69887241	34449	34474	38168	0
1	70190968	16066	16098	28697	28755	28547	30388	LIV5	L142	97124	97074	34449	34474	38168	0
1	70192111	16066	16098	28697	28755	28547	30388	LIV5	L142	97124	97074	34449	34474	38168	0
1	70207374	16066	16098	28697	28755	28547	30388	L142	97124	34449	34474	38168	1
1	70245142	16066	16098	28697	28755	28547	30388	LIV5	L142	97124	97074	34449	34474	38168	1
1	70278918	28547	30388	LIV5	97124	38168	0
1	70928255	16066	16098	28697	28755	28547	30388	LIV5	L142	97124	97074	34449	34474	38168	0
1	71196677	16066	16098	28697	28755	28547	30388	LIV5	L142	97074	34449	34474	38168	0
1	71340164	16098	28697	28755	28547	30388	LIV5	L142	97124	97074	34449	34474	38168	1
1	71362075	16066	16098	28697	28755	28547	30388	LIV5	L142	97124	97074	34449	34474	38168	0
1	71480472	16066	16098	28697	28755	28547	30388	LIV5	L142	97124	97074	34449	34474	38168	0
1	71736806	16066	16098	28697	28755	28547	30388	LIV5	L142	97124	97074	34449	34474	38168	0
1	71780050	16066	16098	28697	28755	28547	30388	LIV5	L142	97124	97074	34449	34474	38168	0
1	71850284	16066	16098	28697	28755	28547	30388	LIV5	L142	97124	97074	34449	34474	38168	1
1	72234174	16066	16098	28697	28755	28547	30388	LIV5	L142	97124	97074	34449	34474	38168	0
1	72603374	16066	28755	28547	30388	97124	97074	34449	38168	0
1	72606176	16066	16098	28755	28547	30388	LIV5	L142	97124	34449	34474	38168	0
1	73151623	16066	16098	28697	28755	28547	30388	LIV5	L142	97124	97074	34449	34474	38168	1
1	73203304	16066	28547	30388	LIV5	L142	97124	97074	38168	1
1	73273480	16066	16098	28697	28755	28547	30388	LIV5	L142	97124	97074	34449	34474	38168	0
1	73371628	16066	16098	28697	28755	28547	30388	LIV5	L142	97124	97074	34449	34474	38168	0
1	73421736	16066	16098	28697	28755	28547	30388	LIV5	L142	97124	97074	34449	34474	38168	0
1	73431311	16066	16098	28697	28755	L142	97074	34449	34474	38168	0
1	73431458	16066	16098	28697	28755	28547	30388	LIV5	L142	97124	97074	34449	34474	38168	1
1	73574328	16066	16098	28697	28755	28547	30388	LIV5	L142	97124	97074	34449	34474	38168	0
1	73754940	16066	16098	28697	28755	28547	30388	L142	34449	34474	38168	0
1	74100186	28755	30388	LIV5	L142	97124	34449	38168	0
1	74152930	16066	16098	28697	28755	28547	30388	LIV5	L142	97124	97074	34449	34474	38168	1
1	74258328	16066	16098	28697	28755	28547	30388	LIV5	L142	97124	97074	34449	34474	38168	0
1	74281098	16066	16098	28697	28547	30388	LIV5	L142	97124	97074	34449	34474	38168	0
1	74337680	16066	16098	28697	28755	28547	30388	LIV5	L142	97124	97074	34449	34474	38168	0
1	74484005	16098	28547	34449	34474	38168	0
1	74935944	16066	16098	28697	28755	28547	30388	LIV5	L142	97124	97074	34449	34474	38168	1
1	75072165	16066	16098	28697	28755	28547	30388	LIV5	L142	97124	97074	34449	34474	38168	0
1	75096208	16066	16098	28697	28755	28547	30388	LIV5	L142	97124	97074	34449	34474	38168	0
1	75178492	16066	16098	28697	28755	28547	30388	LIV5	L142	97124	97074	34449	34474	38168	1
1	75207163	16066	16098	28697	28755	28547	30388	LIV5	L142	97124	97074	34449	34474	38168	1
1	75668167	16066	16098	28697	28755	28547	30388	LIV5	L142	97124	97074	34449	34474	38168	0
1	75938262	16066	16098	28697	28755	28547	30388	LIV5	L142	97124	97074	34449	34474	38168	0
1	75969343	16066	16098	28697	28755	28547	30388	LIV5	L142	97124	97074	34449	34474	38168	0
1	76254443	16066	16098	28697	28755	28547	30388	LIV5	L142	97124	97074	34449	34474	38168	0
1	76348058	16066	16098	28697	28755	28547	30388	LIV5	L142	97124	97074	34449	34474	38168	0
1	76523190	16066	16098	28697	28755	28547	30388	LIV5	97124	97074	34449	34474	38168	0
1	76567080	16066	16098	28697	28755	28547	30388	LIV5	L142	97124	97074	34449	34474	38168	0
1	77223675	16066	16098	28697	28755	28547	30388	LIV5	L142	97124	97074	34449	34474	38168	1
1	77267428	LIV5	97124	97074	34449	34474	38168	1
1	77294156	28755	28547	LIV5	L142	97074	34449	34474	38168	1
1	77442117	16066	16098	28697	28755	LIV5	L142	97124	97074	34449	34474	38168	0
1	77547183	16066	16098	28697	28755	28547	30388	LIV5	L142	97124	97074	34449	34474	38168	0
1	77789782	16066	16098	28697	28547	30388	LIV5	L142	97124	97074	34474	38168	0
1	77810682	16066	16098	28697	28755	28547	30388	LIV5	L142	97124	97074	34449	34474	38168	0
1	77822836	16066	16098	28697	28755	28547	30388	LIV5	L142	97124	97074	34449	34474	38168	1
1	77905482	16066	16098	28697	28755	28547	30388	LIV5	L142	97124	97074	34449	34474	38168	1
1	77910210	16066	16098	28697	28547	30388	LIV5	L142	97124	97074	34449	34474	38168	1
1	77958608	16066	16098	28697	28755	28547	30388	LIV5	L142	97124	97074	34449	34474	38168	1
1	78141166	16066	16098	28697	28755	28547	30388	LIV5	L142	97124	97074	34449	34474	38168	1
1	78268881	16066	16098	28697	LIV5	L142	97124	34449	34474	38168	1
1	78452637	16066	16098	28697	28755	28547	30388	LIV5	L142	97124	97074	34449	34474	38168	1
1	78929959	16066	16098	28697	34474	38168	0
1	79340639	16066	16098	28697	28547	30388	LIV5	L142	97124	97074	34449	34474	38168	0
1	79532028	16066	16098	28697	28755	28547	30388	LIV5	L142	97124	97074	34449	34474	38168	0
1	79702460	16098	28697	28755	28547	30388	LIV5	L142	97124	97074	34474	38168	1
1	79768586	16066	28697	28755	LIV5	L142	97124	97074	38168	0
1	79819107	16066	16098	28697	28755	28547	30388	LIV5	L142	97124	97074	34449	34474	38168	0
1	79937591	16066	16098	28697	28755	28547	30388	LIV5	L142	97124	34449	34474	38168	1
1	80023499	16066	16098	28697	28547	30388	LIV5	L142	97124	97074	34449	34474	38168	0
1	80271523	16066	16098	28697	28755	28547	30388	LIV5	L142	97074	34449	34474	38168	1
1	80668220	16066	28697	28755	28547	30388	LIV5	L142	97124	97074	34449	34474	38168	1
1	80807073	16066	16098	28697	28755	28547	30388	LIV5	L142	97124	97074	34474	38168	1
1	81141823	28755	30388	97124	34449	38168	0
1	81236259	16066	16098	28697	28755	28547	30388	LIV5	L142	97124	97074	34449	34474	38168	1
1	81395403	16098	28697	28755	34449	38168	0
1	81431109	16066	16098	28755	28547	LIV5	97074	34449	34474	38168	0
1	81534802	16066	16098	28697	28755	28547	30388	LIV5	L142	97124	97074	34449	34474	38168	1
1	81568203	16066	16098	28697	28755	28547	30388	LIV5	L142	97124	97074	34449	34474	38168	1
1	82084499	16066	16098	28755	30388	L142	34449	34474	38168	0
1	82095243	16066	16098	28697	28755	28547	30388	LIV5	L142	97124	97074	34449	34474	38168	1
1	82382892	28697	28755	28547	LIV5	97124	34449	34474	38168	0
1	82403602	16066	16098	28697	28755	28547	30388	LIV5	L142	97124	97074	34449	34474	38168	0
1	82973923	16066	16098	28697	28755	28547	30388	97124	97074	34449	34474	38168	0
1	82993803	16066	16098	28697	28755	28547	30388	LIV5	L142	97124	97074	34449	34474	38168	0
1	84161582	16066	16098	28697	28755	28547	30388	97124	97074	34449	34474	38168	0
1	84634011	16066	16098	28697	28755	28547	30388	LIV5	L142	97124	97074	34449	34474	38168	0
1	84690647	97124	97074	38168	1
1	84740792	16066	16098	28697	28755	28547	30388	LIV5	L142	97124	97074	34449	34474	38168	0
1	85033148	16066	16098	28697	28755	28547	30388	LIV5	L142	97124	97074	34449	34474	38168	0
1	85088959	16066	16098	28697	28755	28547	30388	LIV5	L142	97124	34449	34474	38168	0
1	85212419	16098	28697	28755	28547	30388	LIV5	L142	97124	97074	34449	34474	38168	0
1	85481469	16066	16098	28697	28755	28547	30388	LIV5	L142	97124	97074	34449	34474	38168	1
1	85913112	28547	30388	LIV5	L142	97124	97074	34449	34474	38168	0
1	86073085	16098	28697	28755	28547	30388	LIV5	97124	34449	34474	38168	0
1	86170599	28697	28547	97074	34449	38168	1
1	86527566	16098	34449	34474	38168	0
1	86625816	16066	16098	28697	28755	28547	30388	LIV5	L142	97124	97074	34449	34474	38168	0
1	86726361	16066	16098	28697	28755	28547	30388	LIV5	L142	97124	97074	34449	34474	38168	0
1	87027130	16066	16098	28697	28755	28547	30388	LIV5	L142	97124	97074	34449	34474	38168	1
1	87027591	16066	16098	28697	28755	28547	30388	LIV5	L142	97124	97074	34449	34474	38168	1
1	87080448	16066	28755	LIV5	L142	34449	34474	38168	0
1	87189335	16066	16098	28697	28547	30388	LIV5	L142	97124	97074	34449	34474	38168	1
1	87447541	16066	16098	28697	28755	28547	30388	LIV5	L142	97124	97074	34449	34474	38168	0
1	87530214	16066	16098	28697	28755	28547	30388	LIV5	L142	97124	97074	34449	34474	38168	1
1	87784085	16066	16098	28697	28755	28547	30388	LIV5	L142	97124	97074	34449	34474	38168	0
1	88318389	16066	16098	28697	28755	28547	30388	LIV5	L142	97124	97074	34449	34474	38168	0
1	88387107	16066	16098	28697	28755	28547	30388	LIV5	L142	97124	97074	34449	34474	38168	1
1	88576534	16066	16098	28755	28547	30388	LIV5	L142	97124	97074	34449	34474	38168	0
1	88760288	16066	16098	28755	28547	30388	LIV5	L142	97124	97074	34449	34474	38168	1
1	88828011	16066	16098	28697	28547	30388	LIV5	L142	97124	97074	34449	34474	38168	0
1	88934625	16066	16098	28697	28755	28547	30388	LIV5	L142	97124	97074	34449	34474	38168	1
1	89346965	97124	97074	38168	0
1	89645640	16066	16098	28697	28755	28547	30388	LIV5	L142	97124	97074	34449	34474	38168	1
1	89767860	16066	16098	28697	28755	28547	30388	LIV5	L142	97124	34449	34474	38168	0
1	89787971	97124	97074	38168	1
1	89791863	16066	16098	28697	28755	28547	30388	LIV5	L142	97124	97074	34449	34474	38168	1
1	89796386	16066	28697	28755	28547	30388	LIV5	L142	97124	97074	34449	34474	38168	0
1	89822599	16066	16098	28697	28755	28547	30388	LIV5	L142	97124	97074	34449	34474	38168	1
1	89834892	16066	16098	28697	28755	28547	30388	LIV5	L142	97124	97074	34449	34474	38168	1
1	90029608	16066	16098	28697	28755	28547	30388	LIV5	L142	97124	97074	34449	34474	38168	1
1	90048038	16066	16098	28697	28755	28547	30388	LIV5	L142	97124	97074	34474	38168	0
1	90082562	16066	16098	28697	28755	28547	30388	LIV5	L142	97124	97074	34449	34474	38168	1
1	90134539	16066	28697	28547	30388	L142	97074	34449	34474	38168	1
1	90762100	16066	28755	30388	LIV5	L142	34449	38168	1
1	90848432	16066	16098	28697	28755	28547	30388	LIV5	L142	97124	97074	34449	34474	38168	1
1	91020948	16066	16098	28697	28755	28547	30388	LIV5	L142	97124	97074	34449	34474	38168	0
1	91072559	28547	30388	L142	34474	38168	0
1	91087748	16066	16098	28697	28547	30388	LIV5	L142	97124	97074	34449	34474	38168	1
1	91089552	16066	16098	28697	28755	28547	30388	L142	97124	97074	34449	38168	0
1	91158643	28697	30388	LIV5	L142	97124	97074	34449	34474	38168	0
1	91171055	16066	16098	28697	28755	28547	30388	LIV5	L142	97124	97074	34449	34474	38168	1
1	91256846	16066	16098	28697	28755	28547	30388	LIV5	L142	97124	97074	34449	34474	38168	1
1	91295190	28697	28547	30388	LIV5	97124	97074	34449	34474	38168	0
1	91297637	16066	16098	28697	28547	30388	LIV5	L142	97124	97074	34449	34474	38168	1
1	91298138	16066	16098	28697	28547	30388	LIV5	L142	97124	97074	34449	34474	38168	0
1	91638823	16066	16098	28697	28755	34449	38168	0
1	91682682	16066	16098	28697	28755	28547	30388	LIV5	L142	97124	97074	34449	34474	38168	1
1	91689866	16066	16098	28697	28755	28547	30388	LIV5	L142	97124	97074	34449	34474	38168	1
1	91692009	16066	16098	28697	28755	28547	30388	L142	97124	34449	34474	38168	0
1	92225412	28697	28755	28547	30388	LIV5	L142	97124	97074	34449	34474	38168	1
1	92393953	16066	16098	28697	28755	28547	30388	LIV5	L142	97124	97074	34449	34474	38168	0
1	92412134	16066	28697	28755	34449	34474	38168	0
1	92464229	16066	16098	28697	28755	28547	30388	LIV5	L142	97124	97074	34449	34474	38168	0
1	92464469	16066	16098	28697	28755	28547	30388	LIV5	L142	97124	97074	34449	34474	38168	0
1	92479102	16066	16098	28697	28755	28547	30388	LIV5	L142	97124	97074	34449	34474	38168	0
1	92527040	16066	16098	28697	28755	28547	30388	LIV5	L142	97124	97074	34449	34474	38168	0
1	92581977	16066	16098	28697	28755	28547	30388	LIV5	L142	97124	97074	34449	34474	38168	1
1	92602939	16066	16098	28697	28755	28547	30388	LIV5	L142	97124	97074	34449	34474	38168	1
1	92676304	16066	16098	28697	28755	28547	30388	LIV5	L142	97124	97074	34449	34474	38168	1
1	92847151	16066	16098	28697	28547	30388	LIV5	L142	97124	97074	34449	38168	0
1	92851614	16066	16098	34449	38168	1
1	92881559	16066	16098	28697	28755	28547	30388	LIV5	L142	97124	97074	34449	34474	38168	1
1	92928228	16066	16098	28697	28755	28547	30388	LIV5	L142	97124	97074	34449	34474	38168	0
1	93080752	16066	28697	28547	30388	34474	38168	0
1	93151708	16066	16098	28697	28755	28547	30388	LIV5	L142	97124	97074	34449	34474	38168	0
1	93227369	16066	16098	28697	LIV5	97074	34474	38168	0
1	93322696	16066	16098	28697	28755	28547	30388	LIV5	L142	97124	97074	34449	34474	38168	0
1	93327506	28697	28547	97124	97074	34449	38168	1
1	93344549	16066	16098	28697	28755	30388	97124	97074	34449	34474	38168	1
1	93380814	16066	16098	28697	28755	28547	30388	LIV5	L142	97124	97074	34449	34474	38168	0
1	93400334	16098	28547	30388	L142	97074	34449	34474	38168	1
1	93401262	16066	16098	28755	28547	30388	LIV5	L142	97124	97074	34449	34474	38168	0
1	93510064	28547	30388	LIV5	L142	97074	34449	38168	1
1	93565897	16066	16098	28697	28755	28547	30388	LIV5	L142	97124	97074	34449	34474	38168	0
1	93587427	16066	16098	28697	28755	28547	30388	LIV5	L142	97124	97074	34449	34474	38168	1
1	93608484	16066	16098	28697	28755	28547	30388	LIV5	L142	97124	97074	34449	34474	38168	0
1	93640722	16066	28547	30388	LIV5	L142	34474	38168	1
1	93675966	16066	16098	28697	28755	28547	30388	LIV5	L142	97124	97074	34449	34474	38168	0
1	93694038	16066	16098	28697	28755	28547	30388	LIV5	L142	97124	97074	34449	34474	38168	1
1	93696785	16066	16098	28697	28755	28547	30388	LIV5	L142	97124	97074	34449	34474	38168	0
1	93700937	16066	28755	30388	34449	34474	38168	0
1	93704899	16066	16098	28697	28755	28547	30388	LIV5	L142	97124	97074	34449	34474	38168	0
1	93709387	16066	16098	28697	28755	28547	30388	LIV5	L142	97124	97074	34449	34474	38168	1
1	93714570	16066	28697	28755	28547	30388	LIV5	L142	97124	97074	34449	34474	38168	1
1	93728159	28547	30388	LIV5	L142	97124	97074	34449	34474	38168	1
1	93774743	28547	30388	LIV5	L142	97124	97074	34449	34474	38168	0
1	93818681	28755	28547	30388	L142	97074	34449	34474	34474	38168	1
1	93831879	16098	28697	LIV5	34449	38168	0
1	93881593	16066	16098	28697	28755	28547	30388	LIV5	L142	97124	97074	34449	34474	38168	0
1	93967022	16066	16098	28697	28755	28547	30388	LIV5	L142	97124	97074	34449	34474	38168	0
1	93996761	16066	16098	28697	28755	28547	30388	LIV5	L142	97124	97074	34449	34474	38168	0
1	94136422	16066	16098	28697	28547	30388	LIV5	L142	97124	97074	34449	34474	38168	0
1	94235576	16066	16098	28697	28755	28547	30388	LIV5	L142	97124	97074	34449	34474	38168	1
1	94519064	16066	28697	28755	28547	30388	LIV5	L142	97124	97074	34449	34474	38168	1
1	94640133	16066	16098	28697	28755	28547	30388	LIV5	L142	97124	97074	34449	34474	38168	1
1	94980665	16066	16098	28697	28755	28547	30388	LIV5	L142	97124	97074	34449	34474	38168	1
1	95038359	16066	16098	28697	28755	28547	30388	LIV5	L142	97124	97074	34449	34474	38168	0
1	95352380	16066	16098	28697	28755	28547	30388	LIV5	L142	97124	97074	34449	34474	38168	0
1	95392208	16066	16098	28697	28755	28547	30388	LIV5	L142	97124	97074	34449	34474	38168	1
1	95501629	16066	16098	28697	28755	97124	34449	34474	38168	1
1	95598618	16066	16098	28697	28755	28547	30388	LIV5	L142	97124	97074	34449	34474	38168	0
1	95721688	16066	16098	28697	28755	28547	30388	LIV5	L142	97124	97074	34449	34474	38168	0
1	95764379	16066	16098	28697	28755	28547	30388	LIV5	L142	97074	34449	34474	38168	1
1	96459888	16066	16098	28697	28755	28547	30388	LIV5	L142	97124	97074	34449	34474	38168	0
1	96512691	16066	16098	28697	28755	28547	30388	LIV5	L142	97124	97074	34449	34474	38168	0
1	96756759	16066	16098	28697	28755	28547	30388	LIV5	L142	97124	97074	34449	34474	38168	0
1	96789796	16066	16098	28697	28755	28547	30388	LIV5	L142	97124	97074	34449	34474	38168	1
1	97226042	16066	16098	28697	28755	28547	30388	LIV5	L142	97124	97074	34449	34474	38168	0
1	97376226	16066	16098	28755	28547	30388	LIV5	L142	97124	97074	34449	34474	38168	1
1	97424373	16066	16098	38168	0
1	97481871	28547	30388	LIV5	L142	97124	97074	34474	38168	1
1	97492486	16066	16098	28697	28755	28547	30388	LIV5	L142	97124	97074	34449	34474	38168	1
1	97568195	16066	16098	28697	28755	28547	30388	LIV5	L142	97124	97074	34449	34474	38168	1
1	97580362	28697	28755	34449	34474	38168	0
1	97664887	16098	28547	34449	38168	0
1	97723284	16066	16098	28697	28755	28547	30388	LIV5	L142	97124	97074	38168	1
1	97880747	16098	28697	28755	28547	30388	LIV5	97124	97074	34449	34474	38168	1
1	98033793	16066	16098	28697	28755	28547	30388	LIV5	L142	97124	97074	34449	34474	38168	0
1	98189886	16066	16098	28697	28755	28547	30388	LIV5	L142	97124	97074	34449	34474	38168	1
1	98312524	16066	16098	28697	28755	28547	30388	LIV5	L142	97124	97074	34449	34474	38168	1
1	98605129	97124	34449	38168	1
1	98613513	16066	16098	28697	28755	28547	30388	LIV5	L142	97124	97074	34449	34474	38168	1
1	98958609	16066	28697	28755	28547	30388	LIV5	L142	97124	97074	34449	34474	38168	1
1	99205265	16066	16098	28697	28755	28547	30388	LIV5	L142	97124	97074	34449	34474	38168	1
1	99345934	16066	16098	28697	28755	28547	30388	LIV5	L142	97124	97074	34449	34474	38168	0
1	99419531	16066	28755	30388	97124	34449	34474	38168	1
1	99839171	16066	16098	28697	28755	28547	30388	LIV5	L142	97124	97074	34449	34474	38168	1
1	99932334	16066	16098	28697	28755	28547	30388	LIV5	L142	97124	97074	34449	34474	38168	0
1	99951574	16066	16098	28697	28755	28547	30388	LIV5	L142	97124	97074	34449	34474	38168	1
1	99952364	16066	28755	97124	34449	34474	38168	1
1	100103876	16066	28697	28547	LIV5	L142	97124	97074	34449	34474	38168	0
1	100178744	16066	28697	97074	38168	1
1	100318062	16066	16098	28697	28755	28547	30388	LIV5	L142	97124	97074	34449	34474	38168	1
1	100496021	16066	16098	28697	28755	28547	30388	LIV5	L142	97124	97074	34449	34474	38168	0
1	100789303	16066	16098	28697	28755	28547	30388	LIV5	L142	97124	97074	34449	34474	38168	0
1	100803893	16066	16098	28697	28755	28547	30388	LIV5	L142	97124	97074	34449	34474	38168	0
1	100816753	16066	16098	28697	28755	28547	30388	LIV5	L142	97124	97074	34449	34474	38168	0
1	100867232	16066	28697	28755	28547	30388	LIV5	L142	97124	97074	34449	34474	38168	1
1	100917166	16066	16098	28697	28755	28547	30388	LIV5	L142	97124	97074	34449	34474	38168	1
1	101121571	28755	28547	38168	1
1	101169400	16066	16098	28697	28547	30388	LIV5	L142	97124	97074	34449	34474	38168	0
1	101627945	16066	16098	28697	28755	28547	30388	LIV5	L142	97124	97074	34449	34474	38168	0
1	101632297	16066	16098	28697	28755	28547	30388	LIV5	L142	97124	97074	34449	34474	38168	1
1	101809536	16098	34449	38168	1
1	101852699	16066	16098	28697	28755	28547	30388	LIV5	L142	97124	97074	34449	34474	38168	0
1	101854428	16066	16098	28697	28755	28547	30388	LIV5	L142	97124	97074	34449	34474	38168	1
1	102084091	28697	28755	28547	30388	L142	97124	97074	34449	34474	38168	1
1	102813336	16066	16098	28697	28755	28547	30388	LIV5	L142	97124	97074	34449	34474	38168	0
1	102916400	28755	34449	34474	38168	0
1	102921846	16066	16098	28697	28755	28547	30388	LIV5	L142	34449	34474	38168	0
1	102943967	16066	16098	28697	28755	28547	30388	LIV5	L142	97124	97074	34449	34474	38168	0
1	103009382	16066	16098	28697	28755	28547	30388	LIV5	L142	97124	97074	34449	34474	38168	1
1	103209225	16066	16098	28697	28755	28547	30388	LIV5	L142	97124	97074	34449	34474	38168	1
1	103348812	16066	16098	28697	28755	28547	30388	LIV5	L142	97124	97074	34449	34474	38168	0
1	103748652	16066	16098	28697	28755	28547	30388	LIV5	L142	97124	97074	34449	34474	38168	0
1	103799179	16066	16098	28697	28755	28547	30388	LIV5	L142	97124	97074	34449	34474	38168	0
1	103859431	16066	16098	28755	30388	LIV5	L142	97124	97074	34449	34474	38168	1
1	103958465	16066	16098	28697	28755	28547	30388	LIV5	L142	97124	97074	34449	34474	38168	1
1	104045838	16066	16098	28697	28755	28547	30388	LIV5	L142	97124	97074	34449	34474	38168	1
1	104179338	16066	16098	28697	28755	28547	30388	LIV5	L142	97124	97074	34449	34474	38168	0
1	104188858	97124	34474	38168	0
1	104590267	34449	34474	38168	0
1	104816881	16066	16098	28697	28755	28547	30388	LIV5	L142	97074	34449	34474	38168	0
1	104824919	16098	34449	38168	0
1	104840884	16098	28697	28755	28547	30388	LIV5	L142	97124	97074	34449	34474	38168	0
1	104873409	16098	28697	28755	28547	30388	LIV5	L142	97124	97074	34449	34474	38168	1
1	104941030	28697	28755	30388	L142	97124	34449	34474	38168	0
1	104975849	16098	28697	97074	34449	38168	0
1	105079747	16066	16098	28697	28755	28547	30388	LIV5	L142	97124	97074	34449	34474	38168	0
1	105091391	16066	16098	28697	28755	28547	30388	LIV5	L142	97124	97074	34449	34474	38168	0
1	105358213	16066	28547	38168	0
1	105576192	16066	16098	28697	28755	28547	30388	LIV5	L142	97124	97074	34449	34474	38168	0
1	105608611	16066	16098	28697	28547	30388	LIV5	L142	97124	97074	34449	34474	38168	1
1	105763018	28547	30388	LIV5	L142	34449	38168	1
1	105868899	16098	28697	28755	LIV5	L142	38168	0
1	105910200	16066	16098	28697	28755	28547	30388	LIV5	L142	97124	34449	34474	38168	1
1	106204582	16066	16098	28697	28755	28547	30388	LIV5	L142	97124	97074	34449	34474	38168	1
1	106654317	16066	16098	28697	28755	28547	30388	LIV5	L142	97124	97074	34449	34474	38168	1
1	106836059	16066	16098	28697	28755	28547	30388	LIV5	L142	97124	97074	34449	34474	38168	1
1	106998634	16098	28697	34449	34474	38168	0
1	107660446	16066	16098	28697	28755	28547	30388	L142	97124	97074	34449	34474	38168	0
1	108122900	16066	16098	28697	28755	28547	30388	LIV5	L142	97124	97074	34449	34474	38168	1
1	108556873	16066	16098	28697	28755	28547	30388	LIV5	L142	97124	34449	34474	38168	1
1	108769662	16066	16098	28697	28755	28547	30388	LIV5	L142	97124	97074	34449	34474	38168	1
1	108791529	16066	16098	28697	28755	28547	30388	LIV5	L142	97124	97074	34449	34474	38168	1
1	108834090	16066	16098	28697	28755	28547	30388	LIV5	L142	97124	97074	34449	34474	38168	0
1	108851822	16066	16098	28697	28755	28547	30388	LIV5	L142	97124	97074	34449	34474	38168	0
1	109068250	16066	16098	28697	28755	28547	30388	LIV5	L142	97124	97074	34449	34474	38168	0
1	109163684	16066	16098	28697	28755	28547	30388	LIV5	L142	97124	97074	34449	34474	38168	1
1	109276518	16066	16098	28697	L142	97124	97074	34449	34474	38168	0
1	109294469	16066	34474	38168	0
1	109399686	16098	28697	28755	L142	97124	97074	34449	34474	38168	0
1	109418526	16066	16098	28697	28547	30388	LIV5	L142	97124	97074	34449	34474	38168	1
1	109539803	16066	16098	28697	28755	28547	30388	LIV5	L142	97124	97074	34449	34474	38168	0
1	109586794	16098	28697	38168	1
1	109605666	16066	16098	28697	28755	28547	30388	LIV5	L142	97124	97074	34449	34474	38168	0
1	109711329	16066	16098	28697	28755	28547	30388	LIV5	L142	97124	97074	34449	34474	38168	1
1	109737877	16066	16098	28697	28755	30388	34474	38168	1
1	109753461	16066	16098	28697	28755	28547	30388	LIV5	L142	97124	97074	34449	34474	38168	1
1	109824282	16066	16098	28697	28755	28547	30388	LIV5	L142	97124	97074	34449	34474	38168	0
1	109909993	16066	28755	LIV5	L142	97124	34449	34474	38168	1
1	109949814	16066	16098	28697	28755	28547	30388	LIV5	L142	97124	97074	34449	34474	38168	1
1	110009201	16066	16098	28697	28755	34449	34474	38168	0
1	110058507	16066	16098	28697	28755	28547	30388	LIV5	L142	97124	97074	97074	34449	34474	38168	1
1	110072588	16066	16098	28697	28755	28547	30388	LIV5	L142	97124	97074	34449	34474	38168	0
1	110132058	16066	16098	28697	28755	28547	30388	LIV5	L142	97124	97074	34449	34474	38168	1
1	110136850	16098	28697	28755	28547	30388	LIV5	L142	97074	34449	34474	38168	1
1	110235141	16066	16098	28697	28755	28547	30388	LIV5	L142	97124	97074	34449	38168	0
1	110279474	16066	16098	28697	28755	28547	30388	LIV5	L142	97124	97074	34449	34474	38168	0
1	110325324	16066	16098	28697	28755	28547	30388	LIV5	L142	97124	97074	34449	34474	38168	1
1	110332618	16066	16098	28697	28755	28547	30388	LIV5	L142	97124	97074	34449	34474	38168	0
1	110349539	16066	16098	28697	28755	28547	30388	LIV5	L142	97124	97074	34449	34474	38168	0
1	110431656	16066	16098	28697	28755	28547	30388	LIV5	L142	97124	97074	34449	34474	38168	1
1	110444556	16066	16098	28697	28755	28547	30388	LIV5	L142	97124	97074	34449	34474	38168	1
1	110549031	16066	16098	28697	28755	28547	30388	LIV5	L142	97124	97074	34474	38168	0
1	110571052	16066	16098	28697	28755	28547	30388	LIV5	L142	97124	97074	34449	34474	38168	0
1	110662617	16066	16098	28697	28755	28547	30388	LIV5	L142	97124	97074	34449	34474	38168	1
1	110678772	16098	34449	38168	0
1	110866671	16066	16098	28697	28755	28547	30388	LIV5	L142	97124	97074	34449	34474	38168	1
1	110971213	16066	16098	28697	28755	LIV5	L142	97124	97074	34449	34474	38168	0
1	111022550	16066	16098	28697	28755	28547	30388	LIV5	L142	97124	97074	34449	34474	38168	0
1	111034535	16066	16098	28697	28755	28547	30388	LIV5	L142	34449	34474	38168	0
1	111226885	16066	16098	28547	30388	LIV5	L142	97124	97074	34449	34474	38168	1
1	111273393	28697	28755	L142	34474	38168	1
1	111381970	16066	16098	28697	28755	30388	34449	34474	38168	0
1	111462065	16066	16098	28697	28755	28547	30388	LIV5	L142	97124	97074	34449	34474	38168	0
1	111952001	16066	16098	28697	28755	28547	30388	LIV5	L142	97124	97074	34449	34474	38168	0
1	112068345	16066	16098	28697	28755	28547	30388	LIV5	L142	97124	97074	34449	34474	38168	1
1	112139257	LIV5	34474	38168	1
1	112155388	16098	28697	28755	28547	30388	LIV5	L142	97074	34449	34474	38168	1
1	112279935	16066	16098	28697	28755	28547	30388	LIV5	L142	97124	97074	34449	34474	38168	1
1	112303332	16066	16098	28697	28755	28547	30388	LIV5	L142	97074	34449	34474	38168	1
1	112381394	16066	16098	28697	28755	28547	30388	LIV5	L142	97124	97074	34449	34474	38168	0
1	112424887	16066	16098	28697	28755	28547	30388	LIV5	L142	97124	34449	34474	38168	0
1	112433502	16066	28697	28755	28547	30388	LIV5	L142	97124	97074	34449	34474	38168	0
1	112519512	16066	16098	28697	28755	30388	LIV5	L142	97124	97074	34449	34474	38168	1
1	112521214	16098	28547	30388	LIV5	L142	97124	97074	34449	34474	38168	1
1	112613465	16066	16098	28697	28755	28547	30388	LIV5	L142	97124	97074	34449	34474	38168	1
1	112923999	34449	34474	38168	1
1	113113328	L142	34474	38168	0
1	113227648	16066	16098	28547	30388	97124	97074	34449	34474	38168	0
1	113262135	16098	28697	28755	34449	38168	0
1	113395173	16066	16098	28697	28755	28547	30388	LIV5	L142	97124	97074	34449	34474	38168	1
1	113593231	16066	16098	28697	28755	28547	30388	LIV5	L142	97124	97074	34449	34474	38168	1
1	113648309	16066	16098	28697	28755	28547	30388	LIV5	L142	97124	97074	34449	34474	38168	0
1	113727878	16066	16098	28697	28755	28547	30388	LIV5	L142	97124	97074	34449	34474	38168	1
1	113811008	28697	28755	28547	30388	LIV5	L142	97124	97074	34449	34474	38168	0
1	113836809	16066	16098	28697	28755	28547	30388	LIV5	L142	97124	97074	34449	34474	38168	1
1	113895940	97124	97074	38168	0
1	113966520	16066	16098	28697	28547	30388	LIV5	L142	97074	34449	34474	38168	0
1	114008284	16066	16098	28697	28755	28547	30388	LIV5	L142	97124	97074	34449	34474	38168	0
1	114312178	16066	16098	28697	28755	28547	30388	LIV5	L142	97124	97074	34449	34474	38168	0
1	114498819	16098	28697	28755	L142	97124	34449	34474	38168	0
1	114502202	16066	16098	28697	28755	30388	LIV5	L142	97074	34449	34474	38168	1
1	114506468	16066	16098	28697	28755	28547	30388	LIV5	L142	97124	97074	34449	34474	38168	1
1	114649529	16098	28697	28755	28547	30388	LIV5	L142	97124	97074	34449	34474	38168	0
1	114751718	16066	16098	28697	28755	28547	30388	LIV5	L142	97124	97074	34449	34474	38168	1
1	114805385	16066	16098	28697	28755	LIV5	L142	97124	97074	34449	34474	38168	0
1	114806565	16066	16098	28697	28755	LIV5	L142	97124	97074	34449	34474	38168	1
1	114826285	28547	30388	LIV5	L142	97124	97074	38168	0
1	114873563	16066	16098	28697	28755	28547	30388	LIV5	L142	97124	97074	34449	34474	38168	0
1	114923589	16066	16098	28697	28755	28547	30388	LIV5	L142	97124	97074	34449	34474	38168	0
1	115466011	16066	16098	28697	28755	28547	30388	LIV5	L142	97124	97074	34449	34474	38168	1
1	115523617	16066	16098	28697	28755	28547	30388	LIV5	L142	97124	97074	34449	34474	38168	1
1	115561524	16066	16098	28697	28755	28547	30388	97124	97074	34449	34474	38168	0
1	115564819	16066	16098	28697	28755	28547	30388	LIV5	L142	97124	97074	34449	34474	38168	1
1	115584378	16066	16098	28697	28755	28547	30388	LIV5	L142	97124	97074	34449	34474	38168	0
1	115584700	30388	34449	38168	0
1	115604642	16066	16098	28697	28755	28547	30388	LIV5	L142	97124	97074	34449	34474	38168	1
1	115605853	16066	16098	28697	28755	28547	30388	LIV5	L142	97124	97074	34449	34474	38168	0
1	115675049	16066	16098	28697	28755	28547	30388	LIV5	L142	97124	97074	34449	34474	38168	0
1	115755111	16066	16098	28697	28755	28547	30388	LIV5	L142	97124	97074	34449	34474	38168	0
1	115846539	16066	16098	28697	28755	30388	L142	97124	97074	34474	38168	0
1	115889196	16066	16098	28697	28755	28547	30388	LIV5	L142	97124	97074	34449	34474	38168	1
1	116026292	16098	28697	28755	34474	38168	1
1	116093083	28697	LIV5	97124	34449	34474	38168	0
1	116415376	30388	LIV5	97074	34449	34474	38168	1
1	116575726	16066	16098	28697	28755	28547	30388	LIV5	L142	97074	34449	34474	38168	0
1	116596172	28697	30388	97074	34449	34474	38168	0
1	116866008	16066	16098	28697	28755	28547	30388	LIV5	L142	97124	97074	34449	34474	38168	0
1	116900878	16066	16098	28697	28755	28547	30388	LIV5	L142	97124	97074	34449	34474	38168	0
1	116975011	16098	28697	28755	34449	34474	38168	1
1	117030018	16066	16098	28697	28547	30388	34449	34474	38168	0
1	117197147	16066	16098	28697	28755	28547	30388	LIV5	L142	97124	97074	34449	34474	38168	0
1	117535957	16066	16098	28697	28755	LIV5	L142	97124	97074	34449	34474	38168	1
1	117618969	16066	16098	28697	28755	97124	97074	34449	34474	38168	0
1	117621239	97124	97074	38168	1
1	117757017	16066	16098	28697	28755	28547	30388	LIV5	L142	97124	97074	34449	34474	38168	1
1	117860838	16066	16098	28547	30388	L142	97124	38168	0
1	117946350	16066	16098	28697	28755	28547	30388	LIV5	L142	97124	97074	34449	34474	38168	0
1	118040754	16066	16098	28697	28755	28547	30388	LIV5	L142	97124	97074	34449	34474	38168	0
1	118150929	16066	16098	28697	28755	28547	30388	LIV5	L142	97124	97074	34449	34474	38168	1
1	118155614	16066	16098	28697	28755	28547	30388	LIV5	L142	97124	97074	34449	34474	38168	0
1	118175942	16066	16098	28697	28755	28547	30388	LIV5	97124	97074	34449	34474	38168	0
1	118211796	16066	16098	28697	28755	28547	30388	LIV5	L142	97124	97074	34449	34474	38168	0
1	118249051	16066	16098	28697	28755	28547	30388	LIV5	L142	97124	97074	34449	34474	38168	0
1	118264625	16098	28697	L142	34449	34474	38168	0
1	118314991	16066	16098	28697	28755	28547	30388	LIV5	L142	97124	97074	34449	34474	38168	0
1	118456382	16066	16098	28697	28755	28547	30388	LIV5	L142	97124	97074	34449	34474	38168	1
1	118793785	16066	16098	28697	28755	28547	30388	LIV5	L142	97124	97074	34449	34474	38168	0
1	118869028	16066	34449	34474	38168	0
1	118880252	30388	34449	34474	38168	1
1	118948342	16066	97124	34449	38168	0
1	119490331	16066	16098	28697	28755	28547	30388	LIV5	L142	97124	97074	34449	34474	38168	1
1	119695180	16066	16098	28697	28755	28547	30388	LIV5	L142	97124	97074	34449	34474	38168	1
1	119749024	16066	16098	28697	28755	28547	30388	LIV5	L142	97124	97074	34449	34474	38168	1
1	119797607	16066	16098	28697	28755	28547	30388	LIV5	L142	97124	97074	34449	34474	38168	0
1	120629651	16066	16098	28697	28755	28547	30388	LIV5	L142	97124	97074	34449	34474	38168	0
1	120642698	16066	28697	28755	28547	LIV5	97124	97074	34449	38168	0
1	120738714	16098	28697	30388	97124	38168	0
1	120822649	28755	34449	34474	38168	0
1	121003443	16066	16098	28697	28755	28547	30388	LIV5	L142	97124	97074	34449	34474	38168	1
1	121011120	28755	LIV5	97124	97074	38168	1
1	121379601	16066	16098	28755	28547	30388	LIV5	L142	97124	97074	34449	34474	38168	0
1	121397651	16066	16098	28697	28755	28547	30388	LIV5	L142	97124	97074	34449	34474	38168	0
1	121438120	16066	28697	28755	28547	30388	LIV5	L142	97124	97074	34449	34474	38168	1
1	121461485	16066	16098	28697	28755	28547	30388	LIV5	L142	97074	38168	0
1	121491221	16066	16098	28697	28755	28547	30388	LIV5	97124	97074	34449	34474	38168	1
1	121563247	16066	16098	28697	28755	28547	30388	LIV5	L142	97124	97074	34449	34474	38168	0
1	121601739	16066	16098	28697	28755	28547	30388	LIV5	L142	97124	97074	34449	34474	38168	0
1	121605004	16098	28755	28547	30388	L142	97074	34449	38168	0
1	121679661	16066	16098	28697	28755	28547	30388	LIV5	L142	97124	97074	34449	34474	38168	1
1	121702868	16098	L142	97124	97074	38168	0
1	121768111	16066	28697	28755	30388	LIV5	L142	97074	34474	38168	1
1	121815168	16098	28697	30388	LIV5	97124	38168	0
1	121822532	16066	16098	28697	28547	LIV5	L142	97124	34449	34474	38168	0
1	121886504	16066	16098	28697	28755	28547	30388	LIV5	L142	97124	97074	34449	34474	38168	1
1	121935862	16098	28697	30388	LIV5	34449	38168	1
1	122072101	16066	16098	28697	28755	28547	30388	LIV5	L142	97124	97074	34449	34474	38168	1
1	122224348	16066	16098	28755	30388	LIV5	L142	97124	97074	34449	34474	38168	0
1	122470057	16066	16098	28697	28755	LIV5	L142	34449	34474	38168	1
1	122504872	16066	16098	28697	28755	28547	30388	LIV5	L142	97124	97074	34449	34474	38168	1
1	122521441	LIV5	97074	34449	34474	38168	0
1	122553059	16066	16098	28697	28755	97124	34449	34474	38168	1
1	122563093	28755	LIV5	38168	0
1	122646282	16066	16098	28697	28755	28547	30388	LIV5	L142	97124	97074	34449	34474	38168	0
1	122777794	16098	28697	28755	28547	30388	L142	97074	34449	34474	38168	1
1	122813388	16066	16098	28697	28755	28547	30388	LIV5	L142	97124	97074	34449	34474	38168	0
1	122886153	16066	16098	28697	28755	28547	30388	LIV5	L142	97124	97074	34449	34474	38168	1
1	122933085	16066	28697	28755	28547	30388	L142	97124	97074	34474	38168	0
1	122955685	28755	30388	LIV5	L142	97074	38168	1
1	123147977	16066	16098	28697	28755	28547	30388	LIV5	L142	97124	97074	34449	34474	38168	1
1	123232167	16066	16098	28697	28755	28547	30388	LIV5	L142	97124	97074	34449	34474	38168	1
1	123236626	16066	16098	28697	28755	LIV5	L142	97074	34474	38168	0
1	123263968	16098	28697	28755	28547	30388	97074	34449	34474	38168	0
1	123304228	16066	16098	28697	28755	30388	LIV5	34449	34474	38168	0
1	123356339	16066	16098	28697	28755	28547	30388	LIV5	L142	97124	97074	34449	34474	38168	0
1	123415735	16066	16098	28697	28755	28547	30388	LIV5	L142	97124	97074	34449	34474	38168	0
1	123554260	16066	16098	28697	28755	28547	30388	LIV5	L142	97124	97074	34449	34474	38168	0
1	123703260	16098	28697	28547	LIV5	L142	97124	38168	1
1	123729226	16098	28697	28755	28547	30388	LIV5	L142	97074	34449	34474	38168	0
1	123749248	16066	16098	28697	28755	28547	30388	LIV5	L142	97124	97074	34449	34474	38168	1
1	123847433	16066	16098	28697	28755	28547	30388	LIV5	L142	97124	34449	34474	38168	1
1	123894313	16066	16098	28697	28755	28547	30388	LIV5	L142	97124	97074	34449	34474	38168	0
1	123923394	16066	16098	28697	28755	28547	30388	LIV5	L142	97124	97074	34449	34474	38168	0
1	123980153	16066	28697	30388	L142	97074	34449	38168	0
1	123991793	LIV5	97124	34449	38168	1
1	124187288	16066	16098	28697	28755	28547	30388	LIV5	L142	97124	97074	34449	34474	38168	1
1	124196455	16066	16098	28697	97124	97074	34449	38168	1
1	124254015	16066	16098	28697	28755	28547	30388	LIV5	L142	97124	97074	34449	34474	38168	0
1	124272236	16066	16098	28697	28755	28547	30388	LIV5	L142	97124	97074	34449	34474	38168	1
1	124383691	16066	16098	28697	28755	28547	30388	LIV5	L142	97124	97074	34449	34474	38168	1
1	124396292	16066	16098	28697	28755	28547	30388	LIV5	L142	97124	97074	34449	34474	38168	1
1	124396886	16066	16098	28697	28755	28547	30388	LIV5	L142	97124	97074	34449	34474	38168	1
1	124411244	16066	16098	28697	28755	28547	30388	L142	34449	34474	38168	1
1	124436716	16066	16098	28697	28755	28547	30388	LIV5	L142	97124	97074	34449	34474	38168	1
1	124442527	16066	16098	28697	28755	28547	30388	LIV5	L142	97124	97074	34449	34474	38168	0
1	124509946	16066	16098	28697	28547	L142	34449	34474	38168	0
1	124570407	16066	16098	28697	28755	34449	34474	38168	0
1	124619980	16066	16098	28697	28547	30388	LIV5	L142	97124	97074	34449	34474	38168	0
1	124620712	28755	28547	LIV5	L142	97074	34449	34474	38168	0
1	124655751	16066	16098	28697	28755	28547	30388	LIV5	L142	97124	97074	34449	34474	38168	1
1	124665388	16066	16098	28697	28755	28547	30388	LIV5	L142	97124	34449	34474	38168	1
1	124731646	16066	16098	28697	28755	28547	30388	LIV5	L142	97124	97074	34449	34474	38168	1
1	124739088	28697	30388	L142	34474	38168	0
1	124880187	16066	16098	28697	28755	28547	30388	LIV5	L142	97124	97074	34449	34474	38168	0
1	124901885	16066	16098	28697	28755	28547	30388	LIV5	L142	97124	97074	34449	34474	38168	0
1	124902129	16066	16098	28697	28755	28547	30388	LIV5	L142	97124	97074	34449	34474	38168	0
1	124921083	16066	16098	28697	28755	28547	30388	LIV5	L142	97124	97074	34449	34474	38168	1
1	124943792	16066	16098	28697	28755	LIV5	L142	97124	97074	34449	34474	38168	0
1	124947980	16066	16098	28697	28755	28547	30388	LIV5	L142	97124	97074	34449	34474	38168	0
1	124968838	16066	16098	28697	28547	30388	L142	97124	34449	34474	38168	1
1	124970131	28755	28547	30388	LIV5	L142	97124	97074	34449	34474	38168	0
1	125069313	16066	16098	28697	28547	30388	LIV5	L142	97124	97074	34449	34474	38168	0
1	125086109	16066	16098	28697	28547	30388	LIV5	L142	97124	34449	34474	38168	0
1	125131376	16066	16098	28697	28547	30388	LIV5	L142	97124	97074	34449	34474	38168	0
1	125260783	16066	16098	28697	28755	28547	30388	LIV5	L142	97124	97074	34449	34474	38168	0
1	125334514	16066	16098	28697	28755	28547	30388	LIV5	L142	97124	97074	34449	34474	38168	0
1	125341962	16066	28697	28755	28547	30388	LIV5	97124	97074	34449	34474	38168	0
1	125353043	16066	16098	28697	34449	34474	38168	0
1	125356849	16066	16098	28697	28755	28547	30388	LIV5	L142	97124	97074	34449	34474	38168	0
1	125392790	16066	16098	28697	28755	28547	30388	LIV5	L142	97124	97074	34449	34474	38168	0
1	125404356	16066	16098	28697	28755	28547	30388	LIV5	L142	97124	97074	34449	34474	38168	0
1	125427391	16066	16098	28697	28755	28547	30388	LIV5	L142	97124	97074	34449	34474	38168	0
1	125462552	16066	16098	28697	34449	38168	0
1	125515478	16066	16098	28697	28755	28547	30388	LIV5	L142	97124	97074	34449	34474	38168	0
1	125588469	16066	16098	28697	28755	28547	30388	LIV5	L142	97124	34449	34474	38168	1
1	125595654	16066	16098	28697	28755	28547	30388	LIV5	L142	97124	97074	34449	34474	38168	1
1	125608870	16066	16098	28697	28755	28547	30388	LIV5	L142	97124	97074	34449	34474	38168	1
1	125678829	L142	97074	34449	34474	38168	1
1	125683875	16066	16098	28697	28755	28547	30388	LIV5	L142	97124	97074	34449	34474	38168	1
1	125722966	28547	30388	LIV5	L142	97124	97074	34449	34474	38168	1
1	125725217	16066	16098	28697	28755	28547	30388	LIV5	97124	97074	34449	34474	38168	0
1	125753120	34449	34474	38168	0
1	125835107	16066	16098	28697	28755	28547	30388	LIV5	L142	97124	97074	34449	34474	38168	0
1	125864364	16066	16098	28697	28755	28547	LIV5	L142	97124	97074	34449	34474	38168	0
1	125933024	16066	16098	28697	28755	28547	30388	LIV5	L142	97124	97074	34449	34474	38168	1
1	126044916	16066	16098	28697	28755	28547	30388	LIV5	L142	97124	97074	34449	34474	38168	1
1	126085598	16098	28697	28755	28547	30388	LIV5	L142	97124	97074	34449	34474	38168	0
1	126089796	16066	16098	28697	28755	28547	30388	LIV5	L142	97124	97074	34449	34474	38168	0
1	126187564	16066	28697	28755	28547	30388	LIV5	L142	97124	97074	34449	34474	38168	1
1	126299623	16066	16098	28697	28755	28547	30388	LIV5	97124	97074	34449	34474	38168	1
1	126333264	16066	16098	28697	28755	28547	30388	LIV5	L142	97124	97074	34449	34474	38168	0
1	126487353	30388	34449	38168	1
1	126493736	16066	16098	28697	28755	28547	30388	LIV5	L142	97124	97074	34449	34474	38168	1
1	126501733	16066	16098	28697	28755	28547	30388	LIV5	L142	97124	34449	34474	38168	0
1	126709485	16066	28697	28547	30388	LIV5	L142	97124	97074	34449	34474	38168	1
1	126818401	16066	16098	28697	28755	28547	30388	LIV5	L142	97124	97074	34449	34474	38168	1
1	126997170	16098	28697	28755	LIV5	L142	97124	97074	34449	34474	38168	0
1	127080239	16066	16098	28697	28755	28547	30388	LIV5	L142	97124	97074	34449	34474	38168	0
1	127125918	16066	16098	28697	28755	38168	1
1	127263010	16066	16098	28697	28755	28547	30388	LIV5	L142	97124	97074	34449	34474	38168	0
1	127312815	16066	16098	28697	28755	28547	30388	LIV5	L142	97124	97074	34449	34474	38168	1
1	127422893	16066	16098	28697	28755	28547	30388	LIV5	L142	97124	97074	34449	34474	38168	1
1	127893349	97124	97074	34449	38168	0
1	128024852	16066	16098	28697	28755	28547	30388	LIV5	L142	97124	97074	34449	34474	38168	0
1	128036919	16066	16098	28697	28755	28547	30388	LIV5	L142	97124	97074	34449	38168	0
1	128073955	16066	16098	28697	28755	28547	30388	LIV5	97124	97074	34449	34474	38168	0
1	128101284	16066	16098	28697	28755	28547	30388	LIV5	L142	97124	97074	34449	34474	38168	0
1	128161029	16066	16098	28697	28755	28547	30388	LIV5	L142	97124	97074	34449	34474	38168	0
1	128198848	16066	16098	28697	28755	28547	30388	34449	34474	38168	0
1	128274767	16066	16098	28755	34449	34474	38168	0
1	128314623	16066	28697	28755	28547	30388	L142	97124	34449	34474	38168	0
1	128341016	16066	16098	28697	28755	28547	30388	LIV5	L142	97124	97074	34449	34474	38168	1
1	128350228	16066	16098	28697	28755	28547	30388	LIV5	L142	97124	97074	34449	34474	38168	0
1	128419135	16066	16098	28697	28755	28547	30388	LIV5	L142	97124	97074	34449	34474	38168	1
1	128476876	28755	28547	34449	38168	1
1	128481707	16066	16098	28697	28755	28547	30388	LIV5	L142	97124	97074	34449	34474	38168	0
1	128498202	16066	16098	28697	28755	28547	30388	LIV5	L142	97124	97074	34449	34474	38168	0
1	128625597	16066	16098	28697	28755	28547	30388	LIV5	L142	97124	97074	34449	34474	38168	0
1	128644761	16066	16098	28697	28755	28547	30388	LIV5	L142	97124	97074	34449	34474	38168	0
1	128663834	16066	16098	28697	28755	28547	30388	LIV5	L142	97124	97074	34449	34474	38168	0
1	128671637	16066	16098	28697	28755	28547	30388	LIV5	L142	97124	97074	34449	34474	38168	1
1	128705105	16066	L142	38168	0
1	128736844	16066	16098	28697	28755	28547	30388	LIV5	L142	97124	34449	34474	38168	0
1	128748460	16066	16098	28697	28755	28547	30388	LIV5	L142	97124	97074	34449	34474	38168	0
1	128769705	16098	28697	28755	28547	30388	LIV5	L142	97074	34449	34474	38168	1
1	128816687	16066	16098	28697	28547	30388	LIV5	L142	97124	97074	34449	34474	38168	1
1	128826377	16066	16098	28697	28755	28547	30388	LIV5	L142	97124	97074	34449	34474	38168	0
1	128829792	16066	16098	28697	28755	28547	30388	LIV5	L142	97124	97074	34449	34474	38168	1
1	128858365	16066	16098	28697	28755	28547	30388	LIV5	L142	97124	97074	34449	34474	38168	1
1	128905271	28547	30388	97124	97074	34449	34474	38168	1
1	128919529	16066	16098	28697	28755	30388	LIV5	L142	97124	97074	34449	34474	38168	1
1	128946951	16066	16098	28697	28755	28547	30388	LIV5	97124	97074	34449	34474	38168	1
1	129027549	16066	16098	28697	28755	28547	30388	LIV5	L142	97124	97074	34449	34474	38168	1
1	129069030	16066	16098	28697	28755	28547	30388	LIV5	L142	97124	97074	34449	34474	38168	1
1	129201093	16066	16098	28697	34449	38168	0
1	129257836	28547	30388	38168	0
1	129280456	16066	16098	28697	28755	28547	30388	LIV5	L142	97124	97074	34449	34474	38168	0
1	129281053	16066	16098	28697	28755	28547	30388	LIV5	L142	97124	97074	34449	34474	38168	0
1	129299177	16066	16098	28697	28755	28547	30388	LIV5	L142	97124	97074	34449	34474	38168	0
1	129400512	16066	16098	28697	28755	28547	30388	LIV5	L142	97124	97074	34449	34474	38168	0
1	129408373	16066	16098	30388	LIV5	L142	97124	97074	34449	34474	38168	1
1	129455965	16098	28697	28755	34449	34474	38168	1
1	129524713	28697	28755	28547	30388	LIV5	L142	97074	34449	34474	38168	0
1	129705454	16066	16098	28697	28755	28547	30388	LIV5	L142	97124	97074	34449	34474	38168	0
1	129811086	16066	16098	28697	28755	28547	30388	LIV5	L142	97124	97074	34449	34474	38168	0
1	129870673	28697	28755	LIV5	34474	38168	0
1	129942605	16066	16098	28697	28755	28547	30388	LIV5	L142	97124	97074	34449	34474	38168	0
1	129944417	16066	16098	28697	28755	28547	30388	LIV5	L142	97124	97074	34449	34474	38168	1
1	129950620	30388	97124	34449	34474	38168	0
1	129961106	16098	30388	38168	0
1	129985154	28547	30388	LIV5	L142	97124	97074	34449	38168	1
1	130019503	16066	16098	28697	28755	28547	30388	LIV5	L142	97124	97074	34449	34474	38168	1
1	130045649	16066	28697	28755	28547	30388	LIV5	L142	97124	97074	34449	34474	38168	1
1	130069027	28547	30388	LIV5	L142	97124	97074	38168	1
1	130088321	16066	16098	28697	28755	28547	30388	LIV5	L142	97074	34449	34474	38168	0
1	130097695	16066	16098	28697	28755	30388	LIV5	L142	97074	34449	34474	38168	1
1	130140832	16066	16098	28697	28755	28547	30388	LIV5	L142	97124	97074	34449	34474	38168	1
1	130187281	16066	16098	28697	28755	28547	30388	LIV5	L142	97124	97074	34449	34474	38168	0
1	130195501	16066	16098	28697	28755	28547	30388	LIV5	L142	97124	97074	34449	34474	38168	0
1	130204093	16098	28697	30388	L142	34449	38168	1
1	130234705	16066	16098	28697	28755	34449	34474	38168	0
1	130236811	16098	30388	L142	97124	34449	34474	38168	1
1	130240783	16066	16098	28697	28755	28547	30388	LIV5	L142	97124	97074	34449	34474	38168	1
1	130243849	16066	16098	28697	28755	28547	30388	LIV5	L142	97124	97074	34449	34474	38168	0
1	130268181	16066	16098	28697	28755	28547	LIV5	L142	97124	34449	34474	38168	1
1	130271532	16066	16098	28697	28755	28547	30388	LIV5	L142	97124	97074	34449	34474	38168	0
1	130271912	16066	16098	28697	28755	LIV5	97124	97074	34449	34474	38168	1
1	130311754	16066	16098	28697	28755	28547	30388	LIV5	L142	97124	97074	34449	34474	38168	0
1	130315127	16066	16098	28697	28755	28547	30388	LIV5	L142	97124	97074	34449	34474	38168	1
1	130316099	16066	16098	28697	28755	28547	30388	LIV5	L142	97124	97074	34449	34474	38168	0
1	130334797	16066	16098	28697	28755	28547	30388	LIV5	L142	97124	97074	34449	34474	38168	1
1	130414941	16066	16098	28697	28755	28547	30388	LIV5	L142	97124	97074	34449	34474	38168	1
1	130449244	28697	28755	28547	30388	LIV5	L142	97124	97074	34449	34474	38168	1
1	130459240	16066	16098	28697	28755	28547	30388	LIV5	L142	97124	97074	34449	34474	38168	1
1	130466950	16066	16098	28697	28755	28547	30388	LIV5	L142	97124	97074	34449	34474	38168	1
1	130489351	16066	16098	28697	28755	28547	30388	LIV5	L142	97124	97074	34449	34474	38168	1
1	130492120	16066	16098	28697	28755	28547	30388	LIV5	L142	97124	97074	34449	34474	38168	1
1	130534320	16066	16098	28697	28755	28547	30388	LIV5	L142	97124	97074	34449	34474	38168	1
1	130536450	16066	16098	28697	28755	28547	30388	LIV5	L142	97124	97074	34449	34474	38168	1
1	130543965	16066	16098	28697	28755	28547	30388	LIV5	L142	97124	97074	34449	34474	38168	0
1	130571005	16066	16098	28697	28755	28547	30388	LIV5	L142	97124	34449	34474	38168	1
1	130581821	16066	16098	28697	28755	28547	30388	LIV5	L142	97124	97074	34449	34474	38168	1
1	130583346	16066	16098	28697	28755	28547	30388	LIV5	L142	97124	97074	34449	34474	38168	0
1	130624311	28755	30388	L142	38168	0
1	130671506	16098	28697	28755	28547	30388	LIV5	L142	97124	97074	34449	34474	38168	0
1	130757530	16066	16098	28755	28547	30388	LIV5	L142	97124	97074	34449	34474	38168	0
1	130979887	16066	16098	28697	28755	28547	30388	LIV5	L142	97124	97074	34449	34474	38168	1
1	130980304	16066	16098	28697	28755	28547	30388	97124	97074	34449	34474	38168	1
1	131068301	16066	16098	28697	28755	28547	30388	LIV5	L142	97124	97074	34449	34474	38168	0
1	131070179	16066	16098	28697	28755	28547	30388	L142	97124	97074	34449	34474	38168	0
1	131076999	16066	16098	28697	28755	28547	30388	LIV5	L142	97124	97074	34449	34474	38168	0
1	131145496	16066	28697	28755	28547	30388	LIV5	L142	97124	97074	34449	34474	38168	1
1	131195354	28547	30388	97074	38168	0
1	131231083	16066	16098	28697	28755	28547	30388	LIV5	L142	97124	97074	34449	34474	38168	1
1	131232098	16066	28755	34449	38168	1
1	131237090	16066	16098	28697	28755	28547	30388	LIV5	L142	97124	97074	34449	34474	38168	1
1	131317365	16066	16098	28697	28547	30388	LIV5	L142	97124	97074	34449	34474	38168	0
1	131439115	16066	16098	28697	28755	28547	30388	LIV5	L142	97124	97074	34449	34474	38168	1
1	131478074	16066	16098	28697	28755	28547	30388	LIV5	L142	97124	97074	34449	34474	38168	0
1	131576691	16098	28547	30388	97124	34449	38168	0
1	131719374	16066	16098	28697	28755	28547	30388	LIV5	L142	97124	97074	34449	34474	38168	1
1	131805638	97124	97074	38168	1
1	132361981	16066	16098	28697	28755	28547	30388	LIV5	L142	97124	97074	34449	34474	38168	1
1	132519984	28697	LIV5	97124	34449	38168	1
1	132627422	16066	16098	28697	28755	28547	30388	LIV5	L142	97124	97074	34449	34474	38168	0
1	132741456	16066	16098	28697	28755	28547	30388	LIV5	L142	97124	97074	34449	34474	38168	1
1	133069754	16066	16098	28697	28755	28547	30388	LIV5	L142	97124	97074	34449	34474	38168	0
1	133168295	28697	28755	97074	38168	1
1	133281416	16066	16098	28697	28755	28547	30388	LIV5	L142	97124	97074	34449	34474	38168	0
1	133453274	16066	16098	28697	L142	97124	34449	34474	38168	0
1	133600839	16066	16098	28697	28547	30388	LIV5	L142	97124	97074	34449	34474	38168	1
1	133758647	16066	16098	28697	28755	28547	30388	LIV5	L142	97124	97074	34449	34474	38168	0
1	133816872	16098	30388	38168	0
1	134302760	28697	28755	28547	30388	LIV5	34449	34474	38168	0
1	134337816	16066	16098	28697	28755	28547	30388	LIV5	L142	34449	34474	38168	0
1	134521076	16066	16098	28697	28755	28547	30388	LIV5	L142	97124	97074	34449	34474	38168	1
1	134611410	16066	16098	28697	28755	28547	30388	LIV5	L142	97124	97074	34449	34474	38168	0
1	134633566	16066	16098	28697	28755	28547	30388	LIV5	L142	97124	97074	34449	34474	38168	0
1	134711195	16066	16098	28697	28755	28547	30388	LIV5	L142	97124	97074	34449	34474	38168	0
1	134786065	16066	16098	28697	28755	28547	30388	LIV5	L142	97124	97074	34449	34474	38168	1
1	134815718	16066	16098	28697	28547	30388	LIV5	L142	34449	34474	38168	1
1	134920297	16066	28697	28755	28547	L142	34449	34474	38168	0
1	134978758	16066	16098	28697	28755	28547	30388	LIV5	L142	97124	97074	34449	34474	38168	1
1	135114919	16066	16098	28697	28755	L142	97124	97074	34449	34474	38168	1
1	135237688	28697	28755	LIV5	97124	97074	34449	38168	1
1	135416379	16066	28697	28755	34449	34474	38168	0
1	135538510	LIV5	L142	38168	1
1	135541518	16066	16098	28697	28755	28547	30388	LIV5	L142	97124	97074	34449	34474	38168	0
1	135583938	16066	28697	28547	30388	LIV5	L142	97124	97074	34449	34474	38168	1
1	135617149	16098	28697	28755	38168	1
1	135618954	28547	30388	LIV5	L142	97124	97074	34449	38168	0
1	135622004	LIV5	L142	97124	34449	38168	0
1	135643191	16066	28547	LIV5	34449	38168	1
1	135762786	16066	16098	28697	28755	28547	30388	LIV5	L142	97124	97074	34449	34474	38168	0
1	135808162	16066	16098	28697	28755	28547	30388	LIV5	L142	97124	97074	34449	34474	38168	0
1	135863905	16066	16098	28697	28755	LIV5	L142	97124	97074	34449	34474	38168	0
1	135967746	16066	16098	28697	28755	28547	30388	LIV5	L142	97124	97074	34449	34474	38168	1
1	135981522	16066	16098	28697	28755	28547	30388	LIV5	L142	97124	97074	34449	34474	38168	1
1	136015609	16066	16098	28755	38168	1
1	136106409	16066	16098	28697	28755	28547	30388	LIV5	L142	97124	97074	34449	34474	38168	1
1	136107112	28697	28755	LIV5	L142	97074	34449	34474	38168	0
1	136107978	16066	16098	28697	28755	28547	30388	LIV5	L142	97124	97074	34449	34474	38168	0
1	136123000	16066	16098	28697	28755	28547	30388	LIV5	L142	97124	97074	34449	34474	38168	0
1	136325853	16066	16098	28697	28755	28547	30388	LIV5	L142	97124	97074	34449	34474	38168	0
1	136354423	16066	16098	34449	38168	0
1	136357856	28547	30388	L142	34449	34474	38168	0
1	136368875	28697	28755	38168	0
1	136448325	16066	16098	28697	28755	28547	30388	LIV5	L142	97124	97074	34449	34474	38168	0
1	136554686	16066	30388	LIV5	L142	97074	34449	34474	38168	0
1	136641925	16066	16098	28697	28755	28547	30388	LIV5	L142	97124	97074	34449	34474	38168	1
1	136861974	16066	16098	28697	28755	28547	30388	LIV5	L142	97124	97074	34449	34474	38168	1
1	136903103	16066	16098	28697	28755	28547	30388	LIV5	L142	97124	97074	34449	34474	38168	1
1	136978680	16066	16098	28697	28755	LIV5	L142	97124	97074	34449	34474	38168	0
1	137342712	16066	16098	28697	28755	28547	30388	LIV5	L142	97124	97074	34449	34474	38168	1
1	137590927	28697	28755	97124	97074	34449	34474	38168	0
1	137613821	L142	34449	34474	38168	0
1	137624821	16066	16098	28697	28755	28547	30388	LIV5	L142	97124	97074	34449	34474	38168	1
1	137698004	28697	28755	LIV5	97074	34449	34474	38168	0
1	137817377	16066	16098	28697	28755	28547	30388	LIV5	L142	97124	97074	34449	34474	38168	1
1	137837942	16066	16098	28697	28755	28547	30388	LIV5	L142	97124	97074	34449	34474	38168	1
1	138027753	16066	16098	28697	28755	28547	30388	LIV5	L142	97124	97074	34449	34474	38168	0
1	138387600	16066	16098	28697	28547	30388	LIV5	L142	97074	34449	34474	38168	1
1	138932247	16098	28697	30388	34474	38168	0
1	139001083	16066	16098	28697	28755	97124	97074	34449	34474	38168	0
1	139037511	16066	16098	28697	28755	28547	30388	LIV5	L142	97124	97074	34449	34474	38168	1
1	139113536	16066	16098	28697	28755	28547	30388	LIV5	L142	97124	97074	34449	34474	38168	1
1	139178381	16066	16098	28697	28755	28547	30388	LIV5	L142	97124	97074	34449	34474	38168	1
1	139198145	LIV5	97124	97074	38168	1
1	139475955	16066	16098	28697	28755	28547	30388	LIV5	L142	97124	97074	34449	34474	38168	0
1	139633793	16066	16098	28697	28755	28547	30388	LIV5	L142	97124	97074	34449	34474	38168	0
1	139822307	16066	16098	28697	28755	28547	30388	LIV5	97124	97074	34449	34474	38168	1
1	139850451	16066	16098	28697	28755	28547	30388	LIV5	L142	97124	97074	34449	34474	38168	1
1	139948909	16066	16098	28697	28755	28547	30388	LIV5	L142	97124	97074	34449	34474	38168	0
1	139954940	16066	16098	28697	28755	97074	34449	34474	38168	1
1	139958202	16066	16098	28697	28755	28547	30388	LIV5	L142	97124	97074	34449	38168	1
1	139981843	16066	16098	28697	28755	28547	30388	LIV5	L142	97124	97074	34449	34474	38168	0
1	140020805	16066	16098	28697	28755	28547	30388	LIV5	L142	97124	97074	34449	34474	38168	0
1	140046005	16066	16098	28697	28755	28547	30388	LIV5	L142	97124	97074	34449	34474	38168	1
1	140110518	16066	16098	28697	28755	28547	30388	LIV5	L142	97124	97074	34449	34474	38168	0
1	140141015	16066	16098	28697	28755	28547	30388	LIV5	L142	97124	97074	34449	34474	38168	1
1	140142135	16098	28547	30388	LIV5	L142	97124	97074	34449	34474	38168	1
1	140172532	16066	16098	28697	28755	28547	30388	L142	97124	97074	34449	34474	38168	1
1	140172876	16066	28697	28755	28547	30388	LIV5	L142	97124	97074	34449	34474	38168	1
1	140200887	16066	16098	28697	28547	30388	LIV5	97124	97074	34449	34474	38168	1
1	140222050	16098	28755	28547	30388	L142	97074	34449	38168	0
1	140229659	16066	16098	28697	28755	LIV5	L142	97124	97074	34449	34474	38168	1
1	140277745	16066	16098	28697	28755	28547	30388	LIV5	L142	97124	97074	34449	34474	38168	0
1	140303134	16066	16098	28697	28755	28547	30388	LIV5	L142	97124	34449	34474	38168	1
1	140317509	16066	28697	28755	28547	30388	97124	97074	34449	34474	38168	1
1	140367791	16066	16098	28697	28547	30388	LIV5	L142	97124	97074	34449	38168	1
1	140497775	16066	16098	28697	28755	28547	30388	LIV5	L142	97124	97074	34449	34474	38168	1
1	140719982	16066	16098	28697	28755	28547	30388	LIV5	L142	97124	97074	34449	34474	38168	1
1	140789776	16066	16098	28697	28755	28547	30388	LIV5	L142	97124	97074	34449	34474	38168	0
1	140875710	16066	16098	28697	28755	28547	30388	LIV5	L142	97124	97074	34449	34474	38168	1
1	140916944	16066	16098	28547	30388	97124	34449	34474	38168	1
1	140962531	28547	30388	LIV5	L142	97124	97074	34449	38168	1
1	141044214	16098	28547	LIV5	L142	38168	1
1	141231482	28697	28755	38168	0
1	141233919	16066	16098	28697	28755	28547	30388	LIV5	L142	97124	97074	34449	34474	38168	1
1	141503975	16066	16098	28697	28755	28547	30388	LIV5	L142	97124	97074	34449	34474	38168	0
1	141802527	16066	97124	97074	38168	0
1	141805532	16066	16098	28697	28755	28547	30388	LIV5	L142	97124	97074	34449	34474	38168	1
1	141859540	16066	16098	28697	28755	34449	34474	38168	1
1	141926594	16066	16098	28697	28755	28547	30388	LIV5	L142	97124	97074	34449	34474	38168	1
1	141945258	16066	16098	28697	28547	30388	LIV5	L142	97124	97074	34449	34474	38168	0
1	141971770	16066	16098	28697	28755	28547	30388	LIV5	L142	97124	97074	34449	34474	38168	0
1	142017607	34449	34474	38168	0
1	142039303	16066	16098	28697	28755	28547	30388	LIV5	L142	97124	97074	34449	34474	38168	0
1	142056583	16066	16098	28697	28755	28547	30388	LIV5	L142	97124	97074	34449	34474	38168	0
1	142088737	16066	16098	28697	28755	97124	97074	34449	34474	38168	0
1	142275691	16066	16098	28697	28755	28547	30388	LIV5	L142	97124	97074	34449	34474	38168	1
1	142293383	16066	16098	28697	28755	28547	30388	LIV5	L142	97124	97074	34449	34474	38168	1
1	142309997	16066	16098	28697	28755	28547	30388	LIV5	L142	97124	97074	34449	34474	38168	1
1	142317119	16066	16098	28697	28755	28547	30388	LIV5	L142	97124	97074	34449	34474	38168	0
1	142348185	28697	28755	28547	30388	L142	97074	34449	34474	38168	1
1	142433155	16066	28697	28755	28547	30388	97124	34449	34474	38168	1
1	142490293	16066	16098	28697	28755	28547	30388	LIV5	L142	97124	97074	34449	34474	38168	1
1	142526603	16066	16098	28697	28755	28547	30388	LIV5	L142	97124	97074	34449	34474	38168	0
1	142553342	16098	28697	28547	30388	LIV5	L142	97074	34449	34474	38168	1
1	142553880	16098	28697	28547	30388	LIV5	L142	97074	34449	38168	1
1	143007873	16066	16098	28697	28755	LIV5	L142	97124	97074	34449	34474	38168	0
1	143065591	16066	16098	28697	28755	28547	30388	LIV5	L142	97124	97074	34449	34474	38168	1
1	143191273	16066	16098	28697	28755	28547	30388	LIV5	L142	97124	97074	34449	34474	38168	0
1	143215811	16066	16098	28697	28755	28547	30388	LIV5	L142	97124	97074	34449	34474	38168	1
1	143440933	16066	16098	28697	28755	28547	30388	LIV5	L142	97124	97074	34449	34474	38168	1
1	143948064	16066	16098	28697	28755	28547	30388	LIV5	L142	97124	97074	34449	34474	38168	0
1	144028315	16066	16098	28697	28755	28547	30388	LIV5	L142	97124	97074	34449	34474	38168	1
1	144228512	16066	16098	28697	28755	28547	30388	LIV5	L142	97124	97074	34449	34474	38168	0
1	144252295	16066	28755	97124	97074	34449	38168	1
1	144625009	16098	28697	28755	28547	LIV5	97124	34449	34474	38168	1
1	144790219	16066	28697	28755	28547	30388	97124	97074	34449	34474	38168	0
1	144943418	16066	16098	28697	28755	28547	30388	34449	34474	38168	0
1	145072533	28697	28755	28547	30388	LIV5	L142	97124	97074	34474	38168	0
1	145106953	16066	16098	28697	28755	28547	30388	LIV5	L142	97124	34449	34474	38168	0
1	145165915	16066	16098	28697	28755	28547	30388	LIV5	L142	97124	97074	34449	34474	38168	0
1	145255544	30388	97074	34449	38168	0
1	145288445	16066	16098	28697	34449	34474	38168	0
1	145365038	16066	16098	28697	28755	28547	30388	LIV5	L142	97124	97074	34449	34474	38168	1
1	145371249	28755	LIV5	L142	97124	97074	34449	38168	1
1	145374516	16066	16098	28697	28755	28547	30388	LIV5	L142	97124	97074	34449	34474	38168	1
1	145538449	16066	16098	28547	30388	LIV5	L142	97124	97074	34449	34474	38168	1
1	145579324	28697	34449	38168	1
1	145614342	16066	16098	28697	28755	LIV5	97124	97074	34474	38168	1
1	145644764	16066	16098	28697	28755	28547	30388	LIV5	L142	97124	97074	34449	34474	38168	1
1	145925375	16066	16098	28697	28755	28547	30388	LIV5	L142	97074	34449	34474	38168	0
1	145969724	16066	16098	28697	28755	28547	30388	LIV5	L142	97124	97074	34449	34474	38168	1
1	146063600	16066	16098	28697	97124	97074	38168	0
1	146106125	16066	16098	28697	28755	28547	30388	LIV5	L142	97124	97074	34449	34474	38168	1
1	146149416	16066	16098	28697	28547	30388	LIV5	L142	97124	97074	34449	34474	38168	0
1	146260525	16066	16098	28697	28755	LIV5	L142	97124	97074	34449	34474	38168	0
1	146310156	16066	16098	28697	28755	28547	30388	LIV5	L142	97124	97074	34449	34474	38168	1
1	146323750	16066	16098	28697	28755	28547	30388	L142	97074	34449	38168	1
1	146463539	16066	16098	28697	28755	28547	30388	LIV5	L142	97124	97074	34449	34474	38168	0
1	146769961	16066	16098	28697	28755	28547	30388	LIV5	L142	97124	97074	34449	34474	38168	1
1	147184464	16098	28755	28547	30388	LIV5	L142	97124	97074	34449	34474	38168	0
1	147360776	16066	16098	28697	28755	28547	30388	LIV5	L142	97124	97074	34449	34474	38168	1
1	147400065	16066	28697	34449	34474	38168	1
1	147519460	16066	16098	28697	28755	28547	LIV5	34449	34474	38168	0
1	147922506	16066	16098	28697	28755	28547	30388	LIV5	L142	97124	97074	34449	34474	38168	0
1	148031928	16066	16098	28697	28755	28547	30388	LIV5	L142	97124	97074	34449	34474	38168	1
1	148106185	16066	16098	28697	28755	28547	30388	L142	97124	97074	34449	34474	38168	0
1	148187292	16066	16098	28697	28755	28547	30388	LIV5	L142	97124	97074	34449	34474	38168	0
1	148198781	16066	16098	28697	28755	28547	30388	LIV5	L142	97124	97074	34449	34474	38168	1
1	148343758	16066	16098	28697	28755	28547	30388	LIV5	L142	97124	97074	34449	34474	38168	0
1	148444111	28697	30388	LIV5	L142	34449	38168	1
1	148691354	16066	16098	28697	28755	28547	30388	LIV5	L142	97124	97074	34449	34474	38168	1
1	148705124	16098	28697	LIV5	97124	34474	38168	0
1	148815375	16066	16098	28697	28755	28547	30388	LIV5	L142	97124	97074	34449	34474	38168	1
1	148987467	16066	16098	28697	28755	28547	30388	LIV5	L142	97124	97074	34449	34474	38168	0
1	149039435	16066	30388	L142	97124	97074	34449	34474	38168	0
1	149204205	16098	28697	28755	28547	30388	LIV5	L142	97074	34449	34474	38168	1
1	149888191	16066	16098	28697	28755	28547	30388	LIV5	L142	97124	97074	34449	34474	38168	1
1	150067634	16066	16098	28697	28755	28547	30388	LIV5	L142	97124	97074	34449	34474	38168	0
1	150178170	16066	16098	28697	28755	28547	30388	LIV5	L142	97124	97074	34449	34474	38168	0
1	150312580	16066	16098	28697	28755	28547	30388	LIV5	L142	97124	97074	34449	34474	38168	0
1	150348836	16066	16098	28697	28755	28547	30388	LIV5	L142	97124	97074	34449	34474	38168	0
1	150750663	16066	16098	28697	28755	28547	30388	LIV5	L142	97124	97074	34449	34474	38168	0
1	150831653	28755	28547	30388	LIV5	L142	97124	97074	34449	34474	38168	1
1	150974844	16066	16098	28697	28755	28547	30388	LIV5	L142	97124	97074	34449	34474	38168	0
1	151020190	16066	16098	28697	28755	28547	30388	LIV5	L142	97124	97074	34449	34474	38168	1
1	151482175	16066	16098	28697	28755	28547	30388	LIV5	L142	97124	97074	34449	34474	38168	0
1	151588528	16066	16098	28697	28755	28547	30388	LIV5	L142	97124	97074	34449	34474	38168	0
1	151938420	16066	28697	28755	28547	30388	LIV5	L142	97124	97074	34449	34474	38168	0
1	151980815	16066	16098	28697	28755	28547	30388	LIV5	L142	97124	97074	34449	34474	38168	1
1	152082489	16066	28697	28755	34449	38168	1
1	152085023	28697	34449	34474	38168	1
1	152140072	16066	16098	28697	28755	28547	30388	LIV5	L142	97124	97074	34449	34474	38168	0
1	152202052	16066	16098	28697	28755	28547	30388	LIV5	L142	97124	97074	34449	34474	38168	1
1	152234110	16066	16098	28697	28755	28547	30388	LIV5	L142	97124	97074	34449	34474	38168	0
1	153250383	16066	16098	28697	28755	30388	LIV5	L142	97124	97074	34449	34474	38168	0
1	153470870	16066	28697	28755	28547	30388	LIV5	L142	97124	97074	34449	34474	38168	0
1	153506593	16098	28697	28755	28547	30388	LIV5	L142	97074	34449	34474	38168	1
1	153532187	16066	16098	28697	28755	LIV5	L142	97124	97074	34449	34474	38168	0
1	153634036	16066	16098	28697	28755	28547	30388	LIV5	L142	97124	97074	34449	34474	38168	1
1	153678281	16098	28755	28547	30388	LIV5	L142	97074	34449	34474	38168	0
1	153704502	16066	16098	28697	28755	28547	30388	LIV5	L142	97124	97074	34449	34474	38168	1
1	153792079	16066	16098	28697	28755	28547	30388	LIV5	L142	97124	97074	34449	34474	38168	0
1	153967969	16066	16098	28697	28755	28547	30388	LIV5	L142	97124	97074	34449	34474	38168	0
1	154047071	16066	16098	28697	28755	28547	30388	L142	97124	97074	34449	34474	38168	0
1	154093187	16098	28697	28755	28547	30388	LIV5	L142	97124	97074	34449	34474	38168	1
1	154155766	16066	16098	28697	28755	28547	30388	LIV5	L142	97124	97074	34449	34474	38168	1
1	154180398	16066	16098	28697	28755	28547	30388	LIV5	L142	97124	97074	34449	34474	38168	0
1	154234884	16066	16098	28697	28755	28547	30388	LIV5	L142	97124	97074	34449	34474	38168	1
1	154335979	16066	16098	28697	28755	28547	30388	LIV5	97124	97074	34449	34474	38168	0
1	154479500	16066	16098	28697	28755	28547	30388	LIV5	L142	97124	97074	34449	34474	38168	0
1	154652126	16066	16098	28697	28755	28547	30388	LIV5	L142	97124	97074	34449	34474	38168	1
1	154668230	16066	16098	28697	28755	28547	30388	LIV5	L142	97124	97074	34449	34474	38168	0
1	154832216	16066	16098	30388	L142	97074	34449	34474	38168	0
1	154852288	16066	16098	28697	28755	28547	30388	LIV5	L142	97124	97074	34449	34474	38168	0
1	154884629	16066	16098	28697	28755	28547	30388	LIV5	L142	97124	97074	34449	34474	38168	0
1	154943169	16066	16098	28697	28755	28547	30388	LIV5	L142	97124	97074	34449	34474	38168	1
1	154991033	16066	16098	28697	28755	28547	30388	LIV5	L142	97124	97074	34449	34474	38168	0
1	155037415	16066	16098	28697	28755	28547	30388	LIV5	L142	97124	97074	34449	34474	38168	0
1	155057203	16066	16098	28697	28755	28547	30388	LIV5	L142	97124	97074	34449	34474	38168	0
1	155086790	16066	16098	28755	28547	30388	LIV5	L142	97124	97074	34449	34474	38168	1
1	155090973	16066	16098	28697	28755	28547	30388	LIV5	L142	97124	97074	34449	34474	38168	1
1	155104577	16066	16098	28697	28755	28547	30388	LIV5	L142	97124	97074	34449	34474	38168	1
1	155163330	16098	28697	28755	28547	34449	34474	38168	1
1	155163865	16066	16098	28697	28755	28547	97074	34449	34474	38168	1
1	155192213	16066	16098	28697	28547	30388	LIV5	L142	97124	34449	34474	38168	0
1	155209064	16098	28697	34474	38168	1
1	155241756	16098	97074	34449	34474	38168	0
1	155283738	16098	28697	L142	34449	34474	38168	0
1	155286466	16066	16098	28697	28755	28547	30388	LIV5	L142	97124	97074	34449	34474	38168	0
1	155324258	L142	34474	38168	0
1	155460566	16066	16098	28697	28755	28547	30388	LIV5	L142	97124	97074	34449	34474	38168	1
1	155475346	16066	16098	28697	28755	28547	30388	LIV5	L142	97124	97074	34449	34474	38168	1
1	155496092	16066	16098	28697	28755	28547	30388	LIV5	L142	97124	97074	34449	34474	38168	1
1	155544083	16066	16098	28697	28547	30388	LIV5	L142	97074	34449	34474	38168	1
1	155756979	16098	28697	LIV5	L142	34449	34474	38168	1
1	155886150	16098	28697	28755	28547	30388	LIV5	L142	34449	34474	38168	1
1	155959898	16066	16098	28697	28755	28547	30388	LIV5	L142	97124	97074	34449	34474	38168	1
1	156138126	28697	30388	97124	97074	34449	38168	1
1	156324113	16066	16098	28697	28755	28547	30388	LIV5	L142	97124	97074	34449	34474	38168	0
1	156324467	16066	16098	28697	28755	28547	30388	LIV5	L142	97124	97074	34449	34474	38168	1
1	156756137	16066	16098	28697	28547	30388	LIV5	L142	97124	97074	34449	34474	38168	0
1	157646272	16066	16098	28697	28755	28547	LIV5	L142	97124	97074	34449	34474	38168	0
1	157706651	16066	16098	28697	28755	28547	30388	L142	97124	97074	34449	34474	38168	0
1	157804326	16066	16098	28697	28755	28547	30388	LIV5	L142	97124	97074	34449	34474	38168	0
1	158051368	16066	16098	28697	28755	28547	30388	LIV5	L142	97124	97074	34449	34474	38168	1
1	158394637	16066	16098	28697	28755	28547	30388	LIV5	L142	97124	97074	34449	34474	38168	1
1	158516286	16066	16098	28697	28755	28547	30388	LIV5	L142	97124	97074	34449	34474	38168	1
1	158542480	28755	28547	30388	LIV5	97074	34449	34474	38168	0
1	158722393	16066	16098	28697	28755	28547	30388	LIV5	L142	97124	97074	34449	34474	38168	1
1	158727621	16066	16098	28697	28755	28547	30388	LIV5	L142	97124	97074	34449	34474	38168	0
1	158830335	28755	LIV5	97124	97074	34449	34474	38168	0
1	158839943	16066	16098	28697	28755	28547	30388	LIV5	L142	97124	97074	34449	34474	38168	1
1	158925301	16066	16098	28697	28755	28547	30388	LIV5	L142	97124	97074	34449	34474	38168	0
1	159005821	28697	28547	LIV5	97124	34449	34474	38168	1
1	159216937	28697	28755	28547	30388	LIV5	34449	34474	38168	1
1	159238740	16066	16098	28697	28755	28547	30388	LIV5	L142	97124	97074	34449	34474	38168	0
1	159412059	16066	16098	28697	28755	28547	30388	LIV5	L142	97124	97074	34449	34474	38168	0
1	159499040	16066	16098	28697	28755	28547	30388	LIV5	L142	97124	97074	34449	34474	38168	0
1	159513833	16066	16098	28697	28755	28547	30388	LIV5	L142	97124	97074	34449	34474	38168	0
1	159568344	16066	16098	28697	28755	28547	30388	LIV5	L142	97074	34449	34474	38168	0
1	159789726	16066	16098	28697	28755	28547	30388	LIV5	L142	97124	97074	34449	34474	38168	1
1	159971657	16066	16098	28697	28755	28547	30388	LIV5	L142	97124	97074	34449	34474	38168	0
1	159993111	28697	28755	97124	34449	34474	38168	1
1	160314595	16066	16098	28697	28755	28547	30388	LIV5	L142	97124	97074	34449	34474	38168	1
1	160465676	16066	16098	28697	28755	28547	30388	LIV5	L142	97124	97074	34449	34474	38168	0
1	160571576	16066	16098	28697	28755	28547	30388	LIV5	L142	97074	34449	34474	38168	1
1	160602012	16066	16098	28697	34449	34474	38168	1
1	160635166	16066	16098	28697	28755	28547	30388	LIV5	L142	97124	97074	34449	34474	38168	1
1	160972166	16066	16098	28697	28755	28547	30388	LIV5	L142	97124	97074	34449	34474	38168	1
1	160985615	16066	16098	28697	28755	28547	30388	LIV5	L142	97124	97074	34449	34474	38168	1
1	161082260	16066	16098	28697	28755	30388	L142	97124	97074	34449	38168	0
1	161268499	16066	16098	28697	28755	28547	30388	LIV5	L142	97124	97074	34449	34474	38168	0
1	161278360	16066	16098	28697	28755	28547	LIV5	34449	34474	38168	0
1	161296357	16066	16098	28697	28755	28547	30388	LIV5	L142	97124	97074	34449	34474	38168	0
1	161372329	97124	97074	38168	1
1	161403858	16098	28697	28755	28547	30388	LIV5	L142	97124	97074	34474	38168	0
1	161448349	16066	97074	38168	0
1	161474991	16066	16098	28697	28755	28547	30388	LIV5	L142	97124	97074	34449	34474	38168	1
1	161477116	16066	28697	28755	30388	LIV5	L142	97074	34449	34474	38168	1
1	161489694	16066	16098	30388	LIV5	L142	97124	38168	0
1	161557644	28755	97074	34449	38168	1
1	161749304	16066	16098	28755	28547	30388	LIV5	L142	97124	97074	34449	34474	38168	0
1	161767150	16066	16098	28697	28755	28547	30388	LIV5	L142	97124	97074	34449	34474	38168	1
1	161778116	16066	16098	28697	28755	28547	30388	LIV5	L142	97124	97074	34449	34474	38168	0
1	161778839	97074	34449	38168	0
1	161933129	16066	16098	28697	28755	28547	30388	LIV5	L142	97124	97074	34449	34474	38168	0
1	161935286	16066	16098	28697	28755	28547	30388	LIV5	L142	97124	97074	34449	34474	38168	1
1	162015793	16066	16098	LIV5	L142	97124	97074	34449	38168	1
1	162020539	16066	16098	28697	28755	28547	30388	LIV5	L142	97124	97074	34449	34474	38168	0
1	162050712	16066	16098	28697	28755	28547	30388	LIV5	L142	97124	97074	34449	34474	38168	0
1	162050820	16066	16098	28697	28755	34449	34474	38168	0
1	162057436	16066	16098	28697	28755	28547	30388	LIV5	L142	97124	97074	34449	34474	38168	0
1	162076808	16066	16098	28697	28755	28547	30388	LIV5	L142	97124	97074	34449	34474	38168	1
1	162173505	16066	16098	28697	28755	28547	30388	LIV5	L142	97124	97074	34449	34474	38168	1
1	162283355	16066	28697	28755	28547	30388	LIV5	L142	97124	97074	34449	34474	38168	1
1	162722605	28697	34449	38168	0
1	162725139	16066	16098	28697	28755	28547	30388	LIV5	L142	97124	97074	34449	34474	38168	1
1	162811567	16098	28697	28755	LIV5	L142	34449	34474	38168	1
1	162837962	16066	16098	28697	28755	28547	30388	LIV5	L142	97124	97074	34449	34474	38168	0
1	162882248	16066	16098	28697	28755	28547	30388	LIV5	97124	97074	34449	34474	38168	1
1	162968860	16066	16098	28697	28755	28547	30388	LIV5	L142	97124	97074	34449	34474	38168	1
1	163022663	16066	16098	28697	28755	28547	30388	LIV5	L142	97124	97074	34449	34474	38168	0
1	163030158	16066	16098	28697	28755	28547	30388	LIV5	L142	97124	97074	34449	34474	38168	1
1	163056931	28547	30388	34474	38168	0
1	163084825	16066	16098	28697	28755	28547	30388	LIV5	L142	97124	97074	34449	34474	38168	1
1	163234827	LIV5	34449	38168	0
1	163515720	16066	28697	28547	30388	LIV5	L142	97124	97074	34449	34474	38168	1
1	163590075	16066	16098	28697	28755	97124	34449	38168	1
1	163659685	16066	16098	28697	28755	28547	30388	LIV5	L142	97124	97074	34449	34474	38168	1
1	163663785	16066	16098	28697	28755	28547	30388	LIV5	L142	97124	97074	34449	34474	38168	1
1	163725006	16066	16098	28697	28755	28547	30388	LIV5	L142	97124	97074	34449	34474	38168	0
1	163765959	16066	16098	28697	28755	28547	30388	LIV5	L142	97124	97074	34449	34474	38168	0
1	163766524	28697	28755	LIV5	L142	97124	97074	34449	34474	38168	0
1	163842561	16066	16098	28697	28755	28547	30388	LIV5	L142	97124	97074	34449	34474	38168	0
1	163871082	16066	16098	28697	28755	28547	30388	LIV5	L142	97124	97074	34449	34474	38168	0
1	163929768	16066	28697	28755	28547	30388	LIV5	97124	97074	34449	34474	38168	1
1	163949133	16066	30388	LIV5	34449	38168	1
1	163964529	16066	16098	28697	28755	28547	30388	LIV5	L142	97124	97074	34449	34474	38168	1
1	163995455	16098	30388	LIV5	L142	97124	97074	34449	34474	38168	0
1	164009243	16066	34449	38168	0
1	164062921	16066	16098	28697	28755	28547	30388	LIV5	L142	97124	97074	34449	34474	38168	1
1	164071720	16066	16098	28697	28755	28547	30388	LIV5	L142	97124	97074	34449	34474	38168	1
1	164222525	16066	16098	28697	28547	30388	LIV5	L142	97124	97074	34449	34474	38168	0
1	164277731	16066	16098	28697	28755	28547	30388	LIV5	L142	97124	97074	34449	34474	38168	0
1	164293464	34449	34474	38168	0
1	164293736	34449	34474	38168	0
1	164357120	16066	16098	28697	28755	28547	30388	LIV5	L142	97124	97074	34449	34474	38168	0
1	164398062	16066	16098	28697	28755	28547	30388	LIV5	L142	97124	97074	34449	34474	38168	0
1	164511241	16066	16098	28697	28755	28547	30388	LIV5	L142	97124	97074	34449	34474	38168	1
1	164568282	16066	16098	28697	28755	28547	30388	LIV5	L142	97124	97074	34449	34474	38168	0
1	164582610	16066	16098	28697	28755	28547	30388	LIV5	L142	97124	97074	34449	34474	38168	1
1	164614155	16066	16098	28697	28755	28547	30388	LIV5	L142	97124	97074	34449	34474	38168	1
1	164629740	16066	16098	28697	28755	28547	30388	LIV5	L142	97124	97074	34449	34474	38168	1
1	164691573	16066	16098	28697	28755	28547	30388	LIV5	L142	97124	97074	34449	34474	38168	1
1	164696588	16066	16098	28697	28547	30388	LIV5	L142	97124	97074	34449	34474	38168	0
1	164722771	16066	16098	28697	28755	28547	30388	LIV5	L142	97124	97074	34449	34474	38168	1
1	164871401	16098	28697	28755	28547	30388	LIV5	L142	97124	97074	34449	34474	38168	0
1	164917280	16066	16098	28697	28755	28547	30388	LIV5	L142	97124	97074	34449	34474	38168	1
1	164991655	16066	16098	28697	28755	28547	30388	LIV5	L142	97124	97074	34449	34474	38168	1
1	165046211	16066	16098	28697	28755	28547	30388	LIV5	L142	97124	97074	34449	34474	38168	0
1	165209823	16098	28755	30388	L142	97124	97074	34449	34474	38168	1
1	165241272	L142	34449	38168	1
1	165294360	97074	34449	34474	38168	0
1	165328280	16066	16098	28697	28755	28547	30388	LIV5	L142	97124	97074	34449	34474	38168	1
1	165403937	16066	16098	28755	28547	30388	LIV5	L142	97124	97074	34449	34474	38168	0
1	165422263	16066	16098	28697	28755	28547	30388	LIV5	L142	97124	97074	34449	34474	38168	1
1	165858539	16066	16098	28697	28755	28547	30388	LIV5	L142	97124	97074	34449	34474	38168	1
1	165892634	16066	16098	28697	28755	28547	30388	LIV5	L142	97124	97074	34449	34474	38168	0
1	165896662	16066	16098	28697	28755	28547	30388	LIV5	L142	97124	97074	34449	34474	38168	1
1	165955170	16098	28697	28755	28547	30388	LIV5	L142	97124	97074	34449	34474	38168	1
1	165988582	16066	16098	28697	28755	28547	30388	LIV5	L142	97124	97074	34449	34474	38168	0
1	165996699	16066	16098	28697	28755	28547	30388	LIV5	L142	97124	97074	34449	34474	38168	0
1	166082591	16066	16098	28697	28755	28547	30388	LIV5	L142	97124	97074	34449	34474	38168	1
1	166176640	16066	16098	28697	28755	28547	30388	LIV5	L142	97124	97074	34449	34474	38168	0
1	166179447	16066	16098	28697	28755	28547	30388	LIV5	L142	97124	97074	34449	34474	38168	1
1	166198763	16066	28547	30388	L142	97074	34449	34474	38168	0
1	166218823	16066	16098	28697	28755	LIV5	L142	97124	97074	34449	34474	38168	1
1	166237670	16066	16098	28697	28755	28547	30388	LIV5	L142	97124	97074	34449	34474	38168	0
1	166248628	16066	16098	28697	28755	28547	30388	LIV5	L142	97124	97074	34449	34474	38168	0
1	166384642	16066	16098	28697	28755	28547	30388	LIV5	L142	97124	97074	34449	34474	38168	0
1	166435225	16066	16098	28697	28755	28547	30388	LIV5	L142	97124	97074	34449	34474	38168	1
1	166528196	16066	16098	28697	28547	30388	LIV5	L142	97124	97074	34449	34474	38168	0
1	166582061	16066	16098	28697	28755	28547	30388	LIV5	L142	97124	97074	34474	38168	0
1	166651448	16066	16098	28697	28755	28547	30388	LIV5	L142	97124	97074	34449	34474	38168	0
1	166696919	16066	16098	28697	28755	28547	30388	LIV5	L142	97124	97074	34449	34474	38168	0
1	166790776	16066	16098	28697	28755	28547	30388	LIV5	L142	97124	97074	34449	34474	38168	1
1	166831314	16066	16098	28697	28755	28547	30388	LIV5	L142	97124	97074	34449	34474	38168	1
1	166833472	16066	16098	28697	28755	28547	30388	LIV5	L142	97124	97074	34449	34474	38168	1
1	166843230	16066	16098	28697	28755	28547	30388	LIV5	L142	97074	34449	34474	38168	1
1	166879610	16066	16098	28697	28755	28547	30388	LIV5	L142	97124	97074	34449	34474	38168	0
1	166970842	16098	28697	97074	34449	34474	38168	0
1	167150296	16066	16098	28755	30388	LIV5	L142	97074	34449	38168	0
1	167199942	16066	34474	38168	1
1	167289306	16066	16098	97074	34449	34474	38168	0
1	167558151	16066	16098	28697	28755	28547	30388	LIV5	L142	97124	97074	34449	34474	38168	1
1	167690524	28547	30388	LIV5	L142	97124	97074	34449	38168	0
1	167701723	16066	28697	30388	LIV5	L142	97074	34474	38168	1
1	168004832	16066	16098	28697	38168	0
1	168011152	16066	16098	28697	28755	28547	30388	LIV5	L142	97124	97074	34449	34474	38168	1
1	168079185	16066	16098	28697	28755	28547	30388	LIV5	L142	97124	97074	34449	34474	38168	1
1	168237802	16066	16098	28697	28755	28547	30388	LIV5	L142	97124	97074	34449	34474	38168	1
1	168412661	16066	16098	28697	28755	28547	30388	LIV5	L142	97124	97074	34449	34474	38168	0
1	168480497	16066	16098	28697	28755	LIV5	L142	97124	97074	34449	34474	38168	0
1	168660041	16066	28697	28755	28547	30388	LIV5	97124	97074	34449	34474	38168	1
1	168715668	16066	16098	28697	28755	28547	30388	LIV5	L142	97124	97074	34449	34474	38168	0
1	168789849	16066	28547	97074	34449	34474	38168	1
1	168942062	16066	34449	34474	38168	1
1	168943661	16066	16098	28697	28755	28547	30388	LIV5	L142	97124	97074	34449	34474	38168	0
1	168946621	16066	16098	28697	28755	28547	30388	LIV5	L142	97124	97074	34449	34474	38168	1
1	169421422	16066	28755	30388	LIV5	97124	34449	34474	38168	0
1	169451846	16098	LIV5	34449	38168	0
1	169760505	16098	28697	28547	30388	LIV5	97074	34449	34474	38168	1
1	169813210	16066	16098	28697	28755	28547	30388	L142	97124	97074	34449	34474	38168	1
1	169894602	16066	16098	28697	28755	28547	30388	LIV5	L142	97124	97074	34449	34474	38168	1
1	170255590	16066	16098	28697	28755	28547	30388	LIV5	L142	97124	97074	34449	34474	38168	1
1	170267784	16066	16098	28697	28755	28547	30388	LIV5	L142	97124	97074	34449	34474	38168	1
1	170695421	97074	34449	34474	38168	0
1	171068766	16066	16098	28697	28755	28547	30388	LIV5	L142	97124	97074	34449	34474	38168	0
1	171239333	16066	16098	97124	97074	38168	1
1	171312082	16098	28697	28547	30388	LIV5	L142	97124	97074	34449	34474	38168	0
1	171372354	16066	16098	28697	28755	28547	30388	LIV5	L142	97124	97074	34449	34474	38168	0
1	171571160	16066	16098	28697	28755	28547	30388	LIV5	L142	97124	97074	34449	34474	38168	1
1	171574872	16098	28697	28547	30388	38168	0
1	171601647	16066	16098	28547	97124	34474	38168	1
1	171659715	16066	16098	28697	28755	28547	30388	LIV5	L142	97124	97074	34449	34474	38168	1
1	171771719	16066	16098	28697	28755	28547	30388	LIV5	L142	97124	97074	34449	34474	38168	1
1	172219397	16098	34449	34474	38168	1
1	172268614	16066	16098	28697	28755	28547	30388	LIV5	L142	97124	97074	34449	34474	38168	1
1	172475292	16066	16098	28697	28755	28547	30388	LIV5	L142	97124	97074	34449	34474	38168	1
1	172520861	16066	16098	28697	28755	28547	30388	LIV5	L142	97124	97074	34449	34474	38168	1
1	172553946	16066	16098	28697	28755	28547	30388	LIV5	L142	97124	97074	34449	34474	38168	1
1	172812099	28547	30388	97124	97074	34449	34474	38168	0
1	172971215	16066	28697	30388	LIV5	L142	97124	97074	34449	34474	38168	1
1	172984634	16066	16098	28697	28755	28547	30388	LIV5	L142	97124	97074	34449	34474	38168	1
1	173213500	L142	34449	38168	0
1	173583429	16066	16098	28697	28755	28547	30388	LIV5	L142	97124	97074	34449	34474	38168	1
1	173708037	28697	30388	LIV5	L142	97124	38168	0
1	173778263	16066	16098	28697	28755	28547	30388	LIV5	L142	97124	97074	34449	34474	38168	0
1	173967546	16066	16098	28697	28755	28547	30388	LIV5	L142	97124	97074	34449	34474	38168	0
1	174022282	16066	16098	28697	28755	28547	30388	LIV5	L142	97124	97074	34449	34474	38168	1
1	174057984	16066	16098	28697	28755	28547	30388	LIV5	L142	97124	97074	34449	34474	38168	1
1	174063786	16066	16098	28697	28547	30388	LIV5	L142	97124	97074	34449	34474	38168	1
1	174469811	28697	28755	28547	30388	LIV5	L142	97124	97074	34449	38168	1
1	174701882	16066	16098	28697	28755	LIV5	L142	97124	97074	34449	34474	38168	0
1	174792420	16066	16098	28697	28755	28547	30388	LIV5	L142	97124	97074	34449	34474	38168	0
1	175014013	16098	28697	28755	30388	LIV5	97124	97074	34449	34474	38168	0
1	175217274	28697	28755	30388	34449	34474	38168	0
1	175567533	16066	16098	28697	28755	28547	30388	LIV5	L142	97124	97074	34449	34474	38168	0
1	176120372	16066	16098	28697	28755	28547	30388	LIV5	L142	97124	97074	34449	34474	38168	1
1	176136562	16066	16098	28697	28755	28547	30388	LIV5	L142	97124	97074	34449	34474	38168	0
1	176219184	16066	16098	28697	97124	97074	34449	34474	38168	0
1	176238880	16066	28697	L142	34474	38168	0
1	176301765	16066	16098	28697	28755	28547	30388	LIV5	L142	97074	34449	34474	38168	1
1	176511225	16066	16098	28697	28755	28547	30388	LIV5	L142	97124	97074	34449	34474	38168	1
1	176722520	16066	16098	28697	28755	28547	30388	LIV5	L142	97124	97074	34449	34474	38168	1
1	176808496	28547	30388	LIV5	L142	97124	34449	38168	1
1	176966880	16066	16098	28697	28755	28547	30388	LIV5	L142	97124	97074	34449	34474	38168	0
1	177196597	16066	28697	28547	30388	LIV5	97124	97074	34449	34474	38168	1
[truncated: 25,700 more rows]
